# Supplementary material
Source: publisher figshare collection journal article supplement (https://gsapubs.figshare.com/ndownloader/files/23317265)
Supplement: Supplementary file 1 [file 23317265]

## Sheet: Table S2 Comprehensive data set
Sample name	d13Cwood	d13Ccell	d13Cwood_sd	d13Ccell_sd	apparent enrichment (d13Ccell - d13Cwood)	Cellulose_pct	Reference.simp	Cellulose.method	Binomial nomenclature	Age.interval1	Age.Interval2	Habit	Gymnosperm.Angiosperm	Location	Age
NA	-26.8	-26.2	NA	NA	0.6	NA	Borella et al 1998	Jayme-Wise	Quercus sp.	Holocene	Pre-industrial	Deciduous	Angiosperm	Germany-Switzerland	>250 y
NA	-25.8	-25.1	NA	NA	0.7	NA	Borella et al 1998	Jayme-Wise	Quercus sp.	Holocene	Pre-industrial	Deciduous	Angiosperm	Germany-Switzerland	>250 y
NA	-26	-25.3	NA	NA	0.7	NA	Borella et al 1998	Jayme-Wise	Quercus sp.	Holocene	Pre-industrial	Deciduous	Angiosperm	Germany-Switzerland	>250 y
NA	-26.4	-25.7	NA	NA	0.7	NA	Borella et al 1998	Jayme-Wise	Quercus sp.	Holocene	Pre-industrial	Deciduous	Angiosperm	Germany-Switzerland	>250 y
NA	-26.2	-25.3	NA	NA	0.9	NA	Borella et al 1998	Jayme-Wise	Quercus sp.	Holocene	Pre-industrial	Deciduous	Angiosperm	Germany-Switzerland	>250 y
NA	-25.2	-24.2	NA	NA	1	NA	Borella et al 1998	Jayme-Wise	Quercus sp.	Holocene	Pre-industrial	Deciduous	Angiosperm	Germany-Switzerland	>250 y
NA	-26.1	-25.3	NA	NA	0.8	NA	Borella et al 1998	Jayme-Wise	Quercus sp.	Holocene	Pre-industrial	Deciduous	Angiosperm	Germany-Switzerland	>250 y
NA	-25.8	-25.1	NA	NA	0.7	NA	Borella et al 1998	Jayme-Wise	Quercus sp.	Holocene	Pre-industrial	Deciduous	Angiosperm	Germany-Switzerland	>250 y
NA	-26.2	-25.5	NA	NA	0.7	NA	Borella et al 1998	Jayme-Wise	Quercus sp.	Holocene	Pre-industrial	Deciduous	Angiosperm	Germany-Switzerland	>250 y
NA	-25	-23.8	NA	NA	1.2	NA	Borella et al 1998	Jayme-Wise	Quercus sp.	Holocene	Pre-industrial	Deciduous	Angiosperm	Germany-Switzerland	>250 y
NA	-25.5	-24.5	NA	NA	1	NA	Borella et al 1998	Jayme-Wise	Quercus sp.	Holocene	Pre-industrial	Deciduous	Angiosperm	Germany-Switzerland	>250 y
NA	-25.5	-24.6	NA	NA	0.9	NA	Borella et al 1998	Jayme-Wise	Quercus sp.	Holocene	Pre-industrial	Deciduous	Angiosperm	Germany-Switzerland	>250 y
NA	-24.6	-23.5	NA	NA	1.1	NA	Borella et al 1998	Jayme-Wise	Quercus sp.	Holocene	Pre-industrial	Deciduous	Angiosperm	Germany-Switzerland	>250 y
NA	-25.2	-24.2	NA	NA	1	NA	Borella et al 1998	Jayme-Wise	Quercus sp.	Holocene	Pre-industrial	Deciduous	Angiosperm	Germany-Switzerland	>250 y
NA	-25.5	-24.6	NA	NA	0.9	NA	Borella et al 1998	Jayme-Wise	Quercus sp.	Holocene	Pre-industrial	Deciduous	Angiosperm	Germany-Switzerland	>250 y
NA	-25.3	-24.2	NA	NA	1.1	NA	Borella et al 1998	Jayme-Wise	Quercus sp.	Holocene	Pre-industrial	Deciduous	Angiosperm	Germany-Switzerland	>250 y
NA	-24.6	-23.7	NA	NA	0.9	NA	Eglin et al 2008	Leavitt and Danzer 1993	Quercus petraea	Holocene	Post-industrial	Deciduous	Angiosperm	Brazil	NA
NA	-25	-24.2	NA	NA	0.8	NA	Eglin et al 2008	Leavitt and Danzer 1993	Quercus petraea	Holocene	Post-industrial	Deciduous	Angiosperm	Brazil	NA
NA	-24.8	-23.9	NA	NA	0.9	NA	Eglin et al 2008	Leavitt and Danzer 1993	Quercus petraea	Holocene	Post-industrial	Deciduous	Angiosperm	Brazil	NA
NA	-25.2	-24.4	NA	NA	0.8	NA	Eglin et al 2008	Leavitt and Danzer 1993	Quercus petraea	Holocene	Post-industrial	Deciduous	Angiosperm	Brazil	NA
NA	-25.2	-24.2	NA	NA	1	NA	Eglin et al 2008	Leavitt and Danzer 1993	Quercus petraea	Holocene	Post-industrial	Deciduous	Angiosperm	Brazil	NA
NA	-22.6	-21.3	NA	NA	1.3	NA	Evardsson et al 2014	Jayme-Wise	Pinus sylvestris L.	Holocene	Pre-industrial	Evergreen	Gymnosperm	Southern Sweden	4540-4460 BCE
NA	-22.1	-20.6	NA	NA	1.5	NA	Evardsson et al 2014	Jayme-Wise	Pinus sylvestris L.	Holocene	Pre-industrial	Evergreen	Gymnosperm	Southern Sweden	4540-4460 BCE
NA	-22.8	-21.5	NA	NA	1.3	NA	Evardsson et al 2014	Jayme-Wise	Pinus sylvestris L.	Holocene	Pre-industrial	Evergreen	Gymnosperm	Southern Sweden	4540-4460 BCE
NA	-23.2	-22	NA	NA	1.2	NA	Evardsson et al 2014	Jayme-Wise	Pinus sylvestris L.	Holocene	Pre-industrial	Evergreen	Gymnosperm	Southern Sweden	4540-4460 BCE
NA	-23.1	-21.9	NA	NA	1.2	NA	Evardsson et al 2014	Jayme-Wise	Pinus sylvestris L.	Holocene	Pre-industrial	Evergreen	Gymnosperm	Southern Sweden	4540-4460 BCE
NA	-22.6	-21.4	NA	NA	1.2	NA	Evardsson et al 2014	Jayme-Wise	Pinus sylvestris L.	Holocene	Pre-industrial	Evergreen	Gymnosperm	Southern Sweden	4540-4460 BCE
NA	-23	-21.8	NA	NA	1.2	NA	Evardsson et al 2014	Jayme-Wise	Pinus sylvestris L.	Holocene	Pre-industrial	Evergreen	Gymnosperm	Southern Sweden	4540-4460 BCE
NA	-23.2	-22.1	NA	NA	1.1	NA	Evardsson et al 2014	Jayme-Wise	Pinus sylvestris L.	Holocene	Pre-industrial	Evergreen	Gymnosperm	Southern Sweden	4540-4460 BCE
NA	-23.3	-22.2	NA	NA	1.1	NA	Evardsson et al 2014	Jayme-Wise	Pinus sylvestris L.	Holocene	Pre-industrial	Evergreen	Gymnosperm	Southern Sweden	4540-4460 BCE
NA	-23	-22	NA	NA	1	NA	Evardsson et al 2014	Jayme-Wise	Pinus sylvestris L.	Holocene	Pre-industrial	Evergreen	Gymnosperm	Southern Sweden	4540-4460 BCE
NA	-23.2	-22.1	NA	NA	1.1	NA	Evardsson et al 2014	Jayme-Wise	Pinus sylvestris L.	Holocene	Pre-industrial	Evergreen	Gymnosperm	Southern Sweden	4540-4460 BCE
NA	-23.2	-22.2	NA	NA	1	NA	Evardsson et al 2014	Jayme-Wise	Pinus sylvestris L.	Holocene	Pre-industrial	Evergreen	Gymnosperm	Southern Sweden	4540-4460 BCE
NA	-23.3	-22.1	NA	NA	1.2	NA	Evardsson et al 2014	Jayme-Wise	Pinus sylvestris L.	Holocene	Pre-industrial	Evergreen	Gymnosperm	Southern Sweden	4540-4460 BCE
NA	-23.1	-22.1	NA	NA	1	NA	Evardsson et al 2014	Jayme-Wise	Pinus sylvestris L.	Holocene	Pre-industrial	Evergreen	Gymnosperm	Southern Sweden	4540-4460 BCE
NA	-22.9	-21.7	NA	NA	1.2	NA	Evardsson et al 2014	Jayme-Wise	Pinus sylvestris L.	Holocene	Pre-industrial	Evergreen	Gymnosperm	Southern Sweden	4540-4460 BCE
NA	-22.3	-21	NA	NA	1.3	NA	Evardsson et al 2014	Jayme-Wise	Pinus sylvestris L.	Holocene	Pre-industrial	Evergreen	Gymnosperm	Southern Sweden	4540-4460 BCE
NA	-21.8	-20.7	NA	NA	1.1	NA	Evardsson et al 2014	Jayme-Wise	Pinus sylvestris L.	Holocene	Pre-industrial	Evergreen	Gymnosperm	Southern Sweden	4540-4460 BCE
NA	-22.5	-21.5	NA	NA	1	NA	Evardsson et al 2014	Jayme-Wise	Pinus sylvestris L.	Holocene	Pre-industrial	Evergreen	Gymnosperm	Southern Sweden	4540-4460 BCE
NA	-22.2	-21.3	NA	NA	0.9	NA	Evardsson et al 2014	Jayme-Wise	Pinus sylvestris L.	Holocene	Pre-industrial	Evergreen	Gymnosperm	Southern Sweden	4540-4460 BCE
NA	-22.3	-21.3	NA	NA	1	NA	Evardsson et al 2014	Jayme-Wise	Pinus sylvestris L.	Holocene	Pre-industrial	Evergreen	Gymnosperm	Southern Sweden	4540-4460 BCE
NA	-22.1	-21.3	NA	NA	0.8	NA	Evardsson et al 2014	Jayme-Wise	Pinus sylvestris L.	Holocene	Pre-industrial	Evergreen	Gymnosperm	Southern Sweden	4540-4460 BCE
NA	-22.1	-21.2	NA	NA	0.9	NA	Evardsson et al 2014	Jayme-Wise	Pinus sylvestris L.	Holocene	Pre-industrial	Evergreen	Gymnosperm	Southern Sweden	4540-4460 BCE
NA	-22.1	-21.1	NA	NA	1	NA	Evardsson et al 2014	Jayme-Wise	Pinus sylvestris L.	Holocene	Pre-industrial	Evergreen	Gymnosperm	Southern Sweden	4540-4460 BCE
NA	-22.1	-21.2	NA	NA	0.9	NA	Evardsson et al 2014	Jayme-Wise	Pinus sylvestris L.	Holocene	Pre-industrial	Evergreen	Gymnosperm	Southern Sweden	4540-4460 BCE
NA	-22.2	-21.3	NA	NA	0.9	NA	Evardsson et al 2014	Jayme-Wise	Pinus sylvestris L.	Holocene	Pre-industrial	Evergreen	Gymnosperm	Southern Sweden	4540-4460 BCE
NA	-24.3	-23.2	NA	NA	1.1	NA	Evardsson et al 2014	Jayme-Wise	Pinus sylvestris L.	Holocene	Pre-industrial	Evergreen	Gymnosperm	NA	1258-1301 BCE
NA	-24.1	-22.9	NA	NA	1.2	NA	Evardsson et al 2014	Jayme-Wise	Pinus sylvestris L.	Holocene	Pre-industrial	Evergreen	Gymnosperm	NA	1258-1301 BCE
NA	-24.4	-23.3	NA	NA	1.1	NA	Evardsson et al 2014	Jayme-Wise	Pinus sylvestris L.	Holocene	Pre-industrial	Evergreen	Gymnosperm	NA	1258-1301 BCE
NA	-24.5	-23.4	NA	NA	1.1	NA	Evardsson et al 2014	Jayme-Wise	Pinus sylvestris L.	Holocene	Pre-industrial	Evergreen	Gymnosperm	NA	1258-1301 BCE
NA	-24.6	-23.6	NA	NA	1	NA	Evardsson et al 2014	Jayme-Wise	Pinus sylvestris L.	Holocene	Pre-industrial	Evergreen	Gymnosperm	NA	1258-1301 BCE
NA	-24.5	-23.4	NA	NA	1.1	NA	Evardsson et al 2014	Jayme-Wise	Pinus sylvestris L.	Holocene	Pre-industrial	Evergreen	Gymnosperm	NA	1258-1301 BCE
NA	-24.4	-23.5	NA	NA	0.9	NA	Evardsson et al 2014	Jayme-Wise	Pinus sylvestris L.	Holocene	Pre-industrial	Evergreen	Gymnosperm	NA	1258-1301 BCE
NA	-24.2	-23.2	NA	NA	1	NA	Evardsson et al 2014	Jayme-Wise	Pinus sylvestris L.	Holocene	Pre-industrial	Evergreen	Gymnosperm	NA	1258-1301 BCE
NA	-24	-23	NA	NA	1	NA	Evardsson et al 2014	Jayme-Wise	Pinus sylvestris L.	Holocene	Pre-industrial	Evergreen	Gymnosperm	NA	1258-1301 BCE
NA	-24.5	-23.7	NA	NA	0.8	NA	Evardsson et al 2014	Jayme-Wise	Pinus sylvestris L.	Holocene	Pre-industrial	Evergreen	Gymnosperm	NA	1258-1301 BCE
NA	-23.9	-23	NA	NA	0.9	NA	Evardsson et al 2014	Jayme-Wise	Pinus sylvestris L.	Holocene	Pre-industrial	Evergreen	Gymnosperm	NA	1258-1301 BCE
NA	-23.8	-22.8	NA	NA	1	NA	Evardsson et al 2014	Jayme-Wise	Pinus sylvestris L.	Holocene	Pre-industrial	Evergreen	Gymnosperm	NA	1258-1301 BCE
NA	-23.9	-23	NA	NA	0.9	NA	Evardsson et al 2014	Jayme-Wise	Pinus sylvestris L.	Holocene	Pre-industrial	Evergreen	Gymnosperm	NA	1258-1301 BCE
NA	-24	-23.1	NA	NA	0.9	NA	Evardsson et al 2014	Jayme-Wise	Pinus sylvestris L.	Holocene	Pre-industrial	Evergreen	Gymnosperm	NA	1258-1301 BCE
NA	-24.3	-23.2	NA	NA	1.1	NA	Evardsson et al 2014	Jayme-Wise	Pinus sylvestris L.	Holocene	Pre-industrial	Evergreen	Gymnosperm	NA	1258-1301 BCE
NA	-24.1	-23.1	NA	NA	1	NA	Evardsson et al 2014	Jayme-Wise	Pinus sylvestris L.	Holocene	Pre-industrial	Evergreen	Gymnosperm	NA	1258-1301 BCE
NA	-24.2	-23	NA	NA	1.2	NA	Evardsson et al 2014	Jayme-Wise	Pinus sylvestris L.	Holocene	Pre-industrial	Evergreen	Gymnosperm	NA	1258-1301 BCE
NA	-23.7	-22.5	NA	NA	1.2	NA	Evardsson et al 2014	Jayme-Wise	Pinus sylvestris L.	Holocene	Pre-industrial	Evergreen	Gymnosperm	NA	1258-1301 BCE
NA	-23.6	-22.7	NA	NA	0.9	NA	Evardsson et al 2014	Jayme-Wise	Pinus sylvestris L.	Holocene	Pre-industrial	Evergreen	Gymnosperm	NA	1258-1301 BCE
NA	-23.3	-22.2	NA	NA	1.1	NA	Evardsson et al 2014	Jayme-Wise	Pinus sylvestris L.	Holocene	Pre-industrial	Evergreen	Gymnosperm	NA	1258-1301 BCE
NA	-23.9	-22.7	NA	NA	1.2	NA	Evardsson et al 2014	Jayme-Wise	Pinus sylvestris L.	Holocene	Pre-industrial	Evergreen	Gymnosperm	NA	1258-1301 BCE
NA	-23.3	-22.2	NA	NA	1.1	NA	Evardsson et al 2014	Jayme-Wise	Pinus sylvestris L.	Holocene	Pre-industrial	Evergreen	Gymnosperm	NA	1258-1301 BCE
NA	-23	-21.9	NA	NA	1.1	NA	Evardsson et al 2014	Jayme-Wise	Pinus sylvestris L.	Holocene	Pre-industrial	Evergreen	Gymnosperm	NA	1258-1301 BCE
NA	-23.6	-22.7	NA	NA	0.9	NA	Evardsson et al 2014	Jayme-Wise	Pinus sylvestris L.	Holocene	Pre-industrial	Evergreen	Gymnosperm	NA	1258-1301 BCE
NA	-23.2	-22.3	NA	NA	0.9	NA	Evardsson et al 2014	Jayme-Wise	Pinus sylvestris L.	Holocene	Pre-industrial	Evergreen	Gymnosperm	NA	1258-1301 BCE
NA	-28.4	-26	NA	NA	2.4	NA	Guerrieri et al 2017	Jayme-Wise	multiple species Carya tomentosa, Quercus ruba, Tsuga canadensis, Picea rubens, Quercus prinus, Pinus echinata)	Holocene	Post-industrial	Unknown	Unknown	NE United States	Modern
NA	-25.5	-22.8	NA	NA	2.7	NA	Guerrieri et al 2017	Jayme-Wise	multiple species	Holocene	Post-industrial	Unknown	Unknown	NE United States	Modern
NA	-25.5	-26.6	NA	NA	-1.1	NA	Guerrieri et al 2017	Jayme-Wise	multiple species	Holocene	Post-industrial	Unknown	Unknown	NE United States	Modern
NA	-28.3	-26.4	NA	NA	1.9	NA	Guerrieri et al 2017	Jayme-Wise	multiple species	Holocene	Post-industrial	Unknown	Unknown	NE United States	Modern
NA	-25.2	-23.8	NA	NA	1.4	NA	Guerrieri et al 2017	Jayme-Wise	multiple species	Holocene	Post-industrial	Unknown	Unknown	NE United States	Modern
NA	-25.1	-23.2	NA	NA	1.9	NA	Guerrieri et al 2017	Jayme-Wise	multiple species	Holocene	Post-industrial	Unknown	Unknown	NE United States	Modern
NA	-25	-23.2	NA	NA	1.8	NA	Guerrieri et al 2017	Jayme-Wise	multiple species	Holocene	Post-industrial	Unknown	Unknown	NE United States	Modern
NA	-25.1	-23.3	NA	NA	1.8	NA	Guerrieri et al 2017	Jayme-Wise	multiple species	Holocene	Post-industrial	Unknown	Unknown	NE United States	Modern
NA	-25.1	-22.4	NA	NA	2.7	NA	Guerrieri et al 2017	Jayme-Wise	multiple species	Holocene	Post-industrial	Unknown	Unknown	NE United States	Modern
NA	-25.1	-22.6	NA	NA	2.5	NA	Guerrieri et al 2017	Jayme-Wise	multiple species	Holocene	Post-industrial	Unknown	Unknown	NE United States	Modern
NA	-24.6	-22.7	NA	NA	1.9	NA	Guerrieri et al 2017	Jayme-Wise	multiple species	Holocene	Post-industrial	Unknown	Unknown	NE United States	Modern
NA	-24.6	-22.6	NA	NA	2	NA	Guerrieri et al 2017	Jayme-Wise	multiple species	Holocene	Post-industrial	Unknown	Unknown	NE United States	Modern
NA	-24.5	-23.6	NA	NA	0.9	NA	Guerrieri et al 2017	Jayme-Wise	multiple species	Holocene	Post-industrial	Unknown	Unknown	NE United States	Modern
NA	-24.4	-23.2	NA	NA	1.2	NA	Guerrieri et al 2017	Jayme-Wise	multiple species	Holocene	Post-industrial	Unknown	Unknown	NE United States	Modern
NA	-24.3	-22.9	NA	NA	1.4	NA	Guerrieri et al 2017	Jayme-Wise	multiple species	Holocene	Post-industrial	Unknown	Unknown	NE United States	Modern
NA	-24.3	-22.5	NA	NA	1.8	NA	Guerrieri et al 2017	Jayme-Wise	multiple species	Holocene	Post-industrial	Unknown	Unknown	NE United States	Modern
NA	-24.4	-25.3	NA	NA	-0.9	NA	Guerrieri et al 2017	Jayme-Wise	multiple species	Holocene	Post-industrial	Unknown	Unknown	NE United States	Modern
NA	-24.3	-25.9	NA	NA	-1.6	NA	Guerrieri et al 2017	Jayme-Wise	multiple species	Holocene	Post-industrial	Unknown	Unknown	NE United States	Modern
NA	-23.8	-24.3	NA	NA	-0.5	NA	Guerrieri et al 2017	Jayme-Wise	multiple species	Holocene	Post-industrial	Unknown	Unknown	NE United States	Modern
NA	-23.7	-24.3	NA	NA	-0.6	NA	Guerrieri et al 2017	Jayme-Wise	multiple species	Holocene	Post-industrial	Unknown	Unknown	NE United States	Modern
NA	-23.7	-23.7	NA	NA	0	NA	Guerrieri et al 2017	Jayme-Wise	multiple species	Holocene	Post-industrial	Unknown	Unknown	NE United States	Modern
NA	-28.1	-26.9	NA	NA	1.2	NA	Guerrieri et al 2017	Jayme-Wise	multiple species	Holocene	Post-industrial	Unknown	Unknown	NE United States	Modern
NA	-27.9	-25.4	NA	NA	2.5	NA	Guerrieri et al 2017	Jayme-Wise	multiple species	Holocene	Post-industrial	Unknown	Unknown	NE United States	Modern
NA	-27.8	-25.2	NA	NA	2.6	NA	Guerrieri et al 2017	Jayme-Wise	multiple species	Holocene	Post-industrial	Unknown	Unknown	NE United States	Modern
NA	-27.8	-25.7	NA	NA	2.1	NA	Guerrieri et al 2017	Jayme-Wise	multiple species	Holocene	Post-industrial	Unknown	Unknown	NE United States	Modern
NA	-27.8	-25.9	NA	NA	1.9	NA	Guerrieri et al 2017	Jayme-Wise	multiple species	Holocene	Post-industrial	Unknown	Unknown	NE United States	Modern
NA	-27.5	-24.9	NA	NA	2.6	NA	Guerrieri et al 2017	Jayme-Wise	multiple species	Holocene	Post-industrial	Unknown	Unknown	NE United States	Modern
NA	-27.3	-26.6	NA	NA	0.7	NA	Guerrieri et al 2017	Jayme-Wise	multiple species	Holocene	Post-industrial	Unknown	Unknown	NE United States	Modern
NA	-27.2	-25.6	NA	NA	1.6	NA	Guerrieri et al 2017	Jayme-Wise	multiple species	Holocene	Post-industrial	Unknown	Unknown	NE United States	Modern
NA	-27.2	-25.3	NA	NA	1.9	NA	Guerrieri et al 2017	Jayme-Wise	multiple species	Holocene	Post-industrial	Unknown	Unknown	NE United States	Modern
NA	-27.1	-25.8	NA	NA	1.3	NA	Guerrieri et al 2017	Jayme-Wise	multiple species	Holocene	Post-industrial	Unknown	Unknown	NE United States	Modern
NA	-27.2	-26.9	NA	NA	0.3	NA	Guerrieri et al 2017	Jayme-Wise	multiple species	Holocene	Post-industrial	Unknown	Unknown	NE United States	Modern
NA	-26.8	-25.4	NA	NA	1.4	NA	Guerrieri et al 2017	Jayme-Wise	multiple species	Holocene	Post-industrial	Unknown	Unknown	NE United States	Modern
NA	-26.9	-24.8	NA	NA	2.1	NA	Guerrieri et al 2017	Jayme-Wise	multiple species	Holocene	Post-industrial	Unknown	Unknown	NE United States	Modern
NA	-26.7	-25.4	NA	NA	1.3	NA	Guerrieri et al 2017	Jayme-Wise	multiple species	Holocene	Post-industrial	Unknown	Unknown	NE United States	Modern
NA	-26.8	-26.7	NA	NA	0.1	NA	Guerrieri et al 2017	Jayme-Wise	multiple species	Holocene	Post-industrial	Unknown	Unknown	NE United States	Modern
NA	-26.7	-26.6	NA	NA	0.1	NA	Guerrieri et al 2017	Jayme-Wise	multiple species	Holocene	Post-industrial	Unknown	Unknown	NE United States	Modern
NA	-26.5	-25.6	NA	NA	0.9	NA	Guerrieri et al 2017	Jayme-Wise	multiple species	Holocene	Post-industrial	Unknown	Unknown	NE United States	Modern
NA	-26.5	-25.2	NA	NA	1.3	NA	Guerrieri et al 2017	Jayme-Wise	multiple species	Holocene	Post-industrial	Unknown	Unknown	NE United States	Modern
NA	-27.2	-24.1	NA	NA	3.1	NA	Guerrieri et al 2017	Jayme-Wise	multiple species	Holocene	Post-industrial	Unknown	Unknown	NE United States	Modern
NA	-26.6	-24.6	NA	NA	2	NA	Guerrieri et al 2017	Jayme-Wise	multiple species	Holocene	Post-industrial	Unknown	Unknown	NE United States	Modern
NA	-26.5	-24.7	NA	NA	1.8	NA	Guerrieri et al 2017	Jayme-Wise	multiple species	Holocene	Post-industrial	Unknown	Unknown	NE United States	Modern
NA	-26.3	-25.9	NA	NA	0.4	NA	Guerrieri et al 2017	Jayme-Wise	multiple species	Holocene	Post-industrial	Unknown	Unknown	NE United States	Modern
NA	-26.4	-25.9	NA	NA	0.5	NA	Guerrieri et al 2017	Jayme-Wise	multiple species	Holocene	Post-industrial	Unknown	Unknown	NE United States	Modern
NA	-26.5	-26.2	NA	NA	0.3	NA	Guerrieri et al 2017	Jayme-Wise	multiple species	Holocene	Post-industrial	Unknown	Unknown	NE United States	Modern
NA	-26.4	-26.5	NA	NA	-0.1	NA	Guerrieri et al 2017	Jayme-Wise	multiple species	Holocene	Post-industrial	Unknown	Unknown	NE United States	Modern
NA	-26.2	-26.2	NA	NA	0	NA	Guerrieri et al 2017	Jayme-Wise	multiple species	Holocene	Post-industrial	Unknown	Unknown	NE United States	Modern
NA	-26.3	-24.8	NA	NA	1.5	NA	Guerrieri et al 2017	Jayme-Wise	multiple species	Holocene	Post-industrial	Unknown	Unknown	NE United States	Modern
NA	-26.3	-24.3	NA	NA	2	NA	Guerrieri et al 2017	Jayme-Wise	multiple species	Holocene	Post-industrial	Unknown	Unknown	NE United States	Modern
NA	-26.1	-24.5	NA	NA	1.6	NA	Guerrieri et al 2017	Jayme-Wise	multiple species	Holocene	Post-industrial	Unknown	Unknown	NE United States	Modern
NA	-26.1	-24.7	NA	NA	1.4	NA	Guerrieri et al 2017	Jayme-Wise	multiple species	Holocene	Post-industrial	Unknown	Unknown	NE United States	Modern
NA	-26.3	-24.8	NA	NA	1.5	NA	Guerrieri et al 2017	Jayme-Wise	multiple species	Holocene	Post-industrial	Unknown	Unknown	NE United States	Modern
NA	-26.2	-25.1	NA	NA	1.1	NA	Guerrieri et al 2017	Jayme-Wise	multiple species	Holocene	Post-industrial	Unknown	Unknown	NE United States	Modern
NA	-26.2	-25.3	NA	NA	0.9	NA	Guerrieri et al 2017	Jayme-Wise	multiple species	Holocene	Post-industrial	Unknown	Unknown	NE United States	Modern
NA	-26	-24.9	NA	NA	1.1	NA	Guerrieri et al 2017	Jayme-Wise	multiple species	Holocene	Post-industrial	Unknown	Unknown	NE United States	Modern
NA	-25.9	-24.9	NA	NA	1	NA	Guerrieri et al 2017	Jayme-Wise	multiple species	Holocene	Post-industrial	Unknown	Unknown	NE United States	Modern
NA	-26	-25.1	NA	NA	0.9	NA	Guerrieri et al 2017	Jayme-Wise	multiple species	Holocene	Post-industrial	Unknown	Unknown	NE United States	Modern
NA	-25.8	-25.9	NA	NA	-0.1	NA	Guerrieri et al 2017	Jayme-Wise	multiple species	Holocene	Post-industrial	Unknown	Unknown	NE United States	Modern
NA	-25.9	-25.6	NA	NA	0.3	NA	Guerrieri et al 2017	Jayme-Wise	multiple species	Holocene	Post-industrial	Unknown	Unknown	NE United States	Modern
NA	-25.8	-25.3	NA	NA	0.5	NA	Guerrieri et al 2017	Jayme-Wise	multiple species	Holocene	Post-industrial	Unknown	Unknown	NE United States	Modern
NA	-25.6	-25.1	NA	NA	0.5	NA	Guerrieri et al 2017	Jayme-Wise	multiple species	Holocene	Post-industrial	Unknown	Unknown	NE United States	Modern
NA	-25.2	-25	NA	NA	0.2	NA	Guerrieri et al 2017	Jayme-Wise	multiple species	Holocene	Post-industrial	Unknown	Unknown	NE United States	Modern
NA	-25.5	-24.8	NA	NA	0.7	NA	Guerrieri et al 2017	Jayme-Wise	multiple species	Holocene	Post-industrial	Unknown	Unknown	NE United States	Modern
NA	-25.5	-24.5	NA	NA	1	NA	Guerrieri et al 2017	Jayme-Wise	multiple species	Holocene	Post-industrial	Unknown	Unknown	NE United States	Modern
NA	-25.9	-24.6	NA	NA	1.3	NA	Guerrieri et al 2017	Jayme-Wise	multiple species	Holocene	Post-industrial	Unknown	Unknown	NE United States	Modern
NA	-25.8	-24.2	NA	NA	1.6	NA	Guerrieri et al 2017	Jayme-Wise	multiple species	Holocene	Post-industrial	Unknown	Unknown	NE United States	Modern
NA	-25.6	-24.3	NA	NA	1.3	NA	Guerrieri et al 2017	Jayme-Wise	multiple species	Holocene	Post-industrial	Unknown	Unknown	NE United States	Modern
NA	-25.4	-24.1	NA	NA	1.3	NA	Guerrieri et al 2017	Jayme-Wise	multiple species	Holocene	Post-industrial	Unknown	Unknown	NE United States	Modern
NA	-25.1	-24.2	NA	NA	0.9	NA	Guerrieri et al 2017	Jayme-Wise	multiple species	Holocene	Post-industrial	Unknown	Unknown	NE United States	Modern
NA	-26.2	-22.1	NA	NA	4.1	NA	Guerrieri et al 2017	Jayme-Wise	multiple species	Holocene	Post-industrial	Unknown	Unknown	NE United States	Modern
NA	-26	-22.5	NA	NA	3.5	NA	Guerrieri et al 2017	Jayme-Wise	multiple species	Holocene	Post-industrial	Unknown	Unknown	NE United States	Modern
NA	-26.3	-22.9	NA	NA	3.4	NA	Guerrieri et al 2017	Jayme-Wise	multiple species	Holocene	Post-industrial	Unknown	Unknown	NE United States	Modern
NA	-25.8	-23.2	NA	NA	2.6	NA	Guerrieri et al 2017	Jayme-Wise	multiple species	Holocene	Post-industrial	Unknown	Unknown	NE United States	Modern
NA	-25.5	-23.6	NA	NA	1.9	NA	Guerrieri et al 2017	Jayme-Wise	multiple species	Holocene	Post-industrial	Unknown	Unknown	NE United States	Modern
NA	-23.5	-22.9	NA	NA	0.6	NA	Guerrieri et al 2017	Jayme-Wise	multiple species	Holocene	Post-industrial	Unknown	Unknown	NE United States	Modern
NA	-23.3	-23	NA	NA	0.3	NA	Guerrieri et al 2017	Jayme-Wise	multiple species	Holocene	Post-industrial	Unknown	Unknown	NE United States	Modern
NA	-23.2	-22.9	NA	NA	0.3	NA	Guerrieri et al 2017	Jayme-Wise	multiple species	Holocene	Post-industrial	Unknown	Unknown	NE United States	Modern
NA	-23.5	-23.9	NA	NA	-0.4	NA	Guerrieri et al 2017	Jayme-Wise	multiple species	Holocene	Post-industrial	Unknown	Unknown	NE United States	Modern
NA	-23.3	-23.7	NA	NA	-0.4	NA	Guerrieri et al 2017	Jayme-Wise	multiple species	Holocene	Post-industrial	Unknown	Unknown	NE United States	Modern
NA	-23.1	-24.4	NA	NA	-1.3	NA	Guerrieri et al 2017	Jayme-Wise	multiple species	Holocene	Post-industrial	Unknown	Unknown	NE United States	Modern
NA	-25.9	-24.8	NA	NA	1.1	NA	Harlow et al 2006	Leavitt and Danzer 1993	Acer glabrum	Holocene	Post-industrial	Deciduous	Angiosperm	NA	Modern
NA	-27.4	-26.2	NA	NA	1.2	NA	Harlow et al 2006	Leavitt and Danzer 1993	Aesculus hippocastanum	Holocene	Post-industrial	Deciduous	Angiosperm	NA	Modern
NA	-26.8	-26.4	NA	NA	0.4	NA	Harlow et al 2006	Leavitt and Danzer 1993	Astronium sp.	Holocene	Post-industrial	Deciduous	Angiosperm	NA	Modern
NA	-28.1	-26.4	NA	NA	1.7	NA	Harlow et al 2006	Leavitt and Danzer 1993	Balanocarpus sp.	Holocene	Post-industrial	Deciduous	Angiosperm	NA	Modern
NA	-26.9	-25.5	NA	NA	1.4	NA	Harlow et al 2006	Leavitt and Danzer 1993	Bombacopsis sp.	Holocene	Post-industrial	Deciduous	Angiosperm	NA	Modern
NA	-25.1	-24	NA	NA	1.1	NA	Harlow et al 2006	Leavitt and Danzer 1993	Betula alleghaniensis	Holocene	Post-industrial	Deciduous	Angiosperm	NA	Modern
NA	-23.3	-21.8	NA	NA	1.5	NA	Harlow et al 2006	Leavitt and Danzer 1993	Calocedrus decurrens	Holocene	Post-industrial	Evergreen	Gymnosperm	NA	Modern
NA	-27.3	-25.9	NA	NA	1.4	NA	Harlow et al 2006	Leavitt and Danzer 1993	Cedrela sp.	Holocene	Post-industrial	Deciduous	Angiosperm	NA	Modern
NA	-26.8	-25.1	NA	NA	1.7	NA	Harlow et al 2006	Leavitt and Danzer 1993	Cedrelinga sp.	Holocene	Post-industrial	Deciduous	Angiosperm	NA	Modern
NA	-26	-24.7	NA	NA	1.3	NA	Harlow et al 2006	Leavitt and Danzer 1993	Chrysophyllum	Holocene	Post-industrial	Deciduous	Angiosperm	NA	Modern
NA	-27.5	-26.2	NA	NA	1.3	NA	Harlow et al 2006	Leavitt and Danzer 1993	Cordia alliodora	Holocene	Post-industrial	Deciduous	Angiosperm	NA	Modern
NA	-25.6	-24.1	NA	NA	1.5	NA	Harlow et al 2006	Leavitt and Danzer 1993	Dalbergia c.f. nigra	Holocene	Post-industrial	Deciduous	Angiosperm	NA	Modern
NA	-24.7	-23.2	NA	NA	1.5	NA	Harlow et al 2006	Leavitt and Danzer 1993	Distemonanthus sp.	Holocene	Post-industrial	Deciduous	Angiosperm	NA	Modern
NA	-27.6	-26.5	NA	NA	1.1	NA	Harlow et al 2006	Leavitt and Danzer 1993	Elaeagnus angustifolia	Holocene	Post-industrial	Deciduous	Angiosperm	NA	Modern
NA	-29.3	-27.5	NA	NA	1.8	NA	Harlow et al 2006	Leavitt and Danzer 1993	Eschweilera sp.	Holocene	Post-industrial	Deciduous	Angiosperm	NA	Modern
NA	-26	-24.6	NA	NA	1.4	NA	Harlow et al 2006	Leavitt and Danzer 1993	Gleditsia triacanthos	Holocene	Post-industrial	Deciduous	Angiosperm	NA	Modern
NA	-28.9	-27.1	NA	NA	1.8	NA	Harlow et al 2006	Leavitt and Danzer 1993	Hopea sp.	Holocene	Post-industrial	Deciduous	Angiosperm	NA	Modern
NA	-26	-24.7	NA	NA	1.3	NA	Harlow et al 2006	Leavitt and Danzer 1993	Hyeronima sp.	Holocene	Post-industrial	Deciduous	Angiosperm	NA	Modern
NA	-27.3	-25.7	NA	NA	1.6	NA	Harlow et al 2006	Leavitt and Danzer 1993	Hymenaea sp.	Holocene	Post-industrial	Deciduous	Angiosperm	NA	Modern
NA	-26	-24.8	NA	NA	1.2	NA	Harlow et al 2006	Leavitt and Danzer 1993	Hymenolobium sp.	Holocene	Post-industrial	Deciduous	Angiosperm	NA	Modern
NA	-25.1	-23.8	NA	NA	1.3	NA	Harlow et al 2006	Leavitt and Danzer 1993	Juniperus communis	Holocene	Post-industrial	Evergreen	Gymnosperm	NA	Modern
NA	-27.6	-26.2	NA	NA	1.4	NA	Harlow et al 2006	Leavitt and Danzer 1993	Koompassia sp.	Holocene	Post-industrial	Deciduous	Angiosperm	NA	Modern
NA	-23.1	-21.8	NA	NA	1.3	NA	Harlow et al 2006	Leavitt and Danzer 1993	Larix occidentalis	Holocene	Post-industrial	Deciduous	Gymnosperm	NA	Modern
NA	-22.2	-21.1	NA	NA	1.1	NA	Harlow et al 2006	Leavitt and Danzer 1993	Metasequoia glyptostroboides	Holocene	Post-industrial	Deciduous	Gymnosperm	NA	Modern
NA	-26.1	-25.4	NA	NA	0.7	NA	Harlow et al 2006	Leavitt and Danzer 1993	Myroxylon sp.	Holocene	Post-industrial	Deciduous	Angiosperm	NA	Modern
NA	-24.5	-23.4	NA	NA	1.1	NA	Harlow et al 2006	Leavitt and Danzer 1993	Nauclea sp.	Holocene	Post-industrial	Evergreen	Angiosperm	NA	Modern
NA	-26.8	-25.9	NA	NA	0.9	NA	Harlow et al 2006	Leavitt and Danzer 1993	Nyssa sylvatica	Holocene	Post-industrial	Deciduous	Angiosperm	NA	Modern
NA	-28.2	-26.5	NA	NA	1.7	NA	Harlow et al 2006	Leavitt and Danzer 1993	Ocotea sp.	Holocene	Post-industrial	Evergreen	Angiosperm	NA	Modern
NA	-24.8	-24.1	NA	NA	0.7	NA	Harlow et al 2006	Leavitt and Danzer 1993	Pinus monticola	Holocene	Post-industrial	Evergreen	Gymnosperm	NA	Modern
NA	-26.9	-25	NA	NA	1.9	NA	Harlow et al 2006	Leavitt and Danzer 1993	Platymiscium sp.	Holocene	Post-industrial	Deciduous	Angiosperm	NA	Modern
NA	-25.1	-24.2	NA	NA	0.9	NA	Harlow et al 2006	Leavitt and Danzer 1993	Populus alba	Holocene	Post-industrial	Deciduous	Angiosperm	NA	Modern
NA	-24.8	-24.1	NA	NA	0.7	NA	Harlow et al 2006	Leavitt and Danzer 1993	Psuedotsuga menziesii	Holocene	Post-industrial	Evergreen	Gymnosperm	NA	Modern
NA	-24.8	-23.3	NA	NA	1.5	NA	Harlow et al 2006	Leavitt and Danzer 1993	Quercus alba	Holocene	Post-industrial	Deciduous	Angiosperm	NA	Modern
NA	-24	-23.2	NA	NA	0.8	NA	Harlow et al 2006	Leavitt and Danzer 1993	Robinia pseudoacacia	Holocene	Post-industrial	Deciduous	Angiosperm	NA	Modern
NA	-25.3	-24.1	NA	NA	1.2	NA	Harlow et al 2006	Leavitt and Danzer 1993	Swintonia sp.	Holocene	Post-industrial	Deciduous	Angiosperm	NA	Modern
NA	-24.3	-22.8	NA	NA	1.5	NA	Harlow et al 2006	Leavitt and Danzer 1993	Taxus brevifolia	Holocene	Post-industrial	Evergreen	Gymnosperm	NA	Modern
NA	-24.5	-23.8	NA	NA	0.7	NA	Harlow et al 2006	Leavitt and Danzer 1993	Thuja plicata	Holocene	Post-industrial	Evergreen	Gymnosperm	NA	Modern
NA	-26.5	-24.9	NA	NA	1.6	NA	Harlow et al 2006	Leavitt and Danzer 1993	Tilia americana	Holocene	Post-industrial	Deciduous	Angiosperm	NA	Modern
NA	-27.5	-26.3	NA	NA	1.2	NA	Harlow et al 2006	Leavitt and Danzer 1993	Triplochiton sp.	Holocene	Post-industrial	Unknown	Angiosperm	NA	Modern
NA	-26.3	-24.6	NA	NA	1.7	NA	Harlow et al 2006	Leavitt and Danzer 1993	Tristania sp.	Holocene	Post-industrial	Evergreen	Gymnosperm	NA	Modern
NA	-27.7	-26.3	NA	NA	1.4	NA	Harlow et al 2006	Leavitt and Danzer 1993	Ulmus pumila	Holocene	Post-industrial	Deciduous	Angiosperm	NA	Modern
NA	-28.1	-26.8	NA	NA	1.3	NA	Harlow et al 2006	Leavitt and Danzer 1993	Vochysia sp.	Holocene	Post-industrial	Deciduous	Angiosperm	NA	Modern
NA	-26.3	-24.8	NA	NA	1.5	NA	Harlow et al 2006	Leavitt and Danzer 1993	Diaspyros sp.	Holocene	Post-industrial	Unknown	Unknown	NA	Modern
NA	-26.9	-25	NA	NA	1.9	NA	Harlow et al 2006	Leavitt and Danzer 1993	Lophira sp.	Holocene	Post-industrial	Unknown	Unknown	NA	Modern
NA	-29.7	-28.4	NA	NA	1.3	NA	Hietz et al 2005	Diglyme	Cedrela sp. and Swietenia sp.	Holocene	Post-industrial	NA	Angiosperm	Brazil	NA
NA	-29.7	-28.5	NA	NA	1.2	NA	Hietz et al 2005	Diglyme	Cedrela sp. and Swietenia sp.	Holocene	Post-industrial	NA	Angiosperm	Brazil	NA
NA	-29.2	-27.3	NA	NA	1.9	NA	Hietz et al 2005	Diglyme	Cedrela sp. and Swietenia sp.	Holocene	Post-industrial	NA	Angiosperm	Brazil	NA
NA	-29	-27.3	NA	NA	1.7	NA	Hietz et al 2005	Diglyme	Cedrela sp. and Swietenia sp.	Holocene	Post-industrial	NA	Angiosperm	Brazil	NA
NA	-29	-27.2	NA	NA	1.8	NA	Hietz et al 2005	Diglyme	Cedrela sp. and Swietenia sp.	Holocene	Post-industrial	NA	Angiosperm	Brazil	NA
NA	-28.8	-27	NA	NA	1.8	NA	Hietz et al 2005	Diglyme	Cedrela sp. and Swietenia sp.	Holocene	Post-industrial	NA	Angiosperm	Brazil	NA
NA	-28.9	-26.8	NA	NA	2.1	NA	Hietz et al 2005	Diglyme	Cedrela sp. and Swietenia sp.	Holocene	Post-industrial	NA	Angiosperm	Brazil	NA
NA	-28.7	-26.7	NA	NA	2	NA	Hietz et al 2005	Diglyme	Cedrela sp. and Swietenia sp.	Holocene	Post-industrial	NA	Angiosperm	Brazil	NA
NA	-28.9	-26.6	NA	NA	2.3	NA	Hietz et al 2005	Diglyme	Cedrela sp. and Swietenia sp.	Holocene	Post-industrial	NA	Angiosperm	Brazil	NA
NA	-28.4	-26.8	NA	NA	1.6	NA	Hietz et al 2005	Diglyme	Cedrela sp. and Swietenia sp.	Holocene	Post-industrial	NA	Angiosperm	Brazil	NA
NA	-28.5	-26.8	NA	NA	1.7	NA	Hietz et al 2005	Diglyme	Cedrela sp. and Swietenia sp.	Holocene	Post-industrial	NA	Angiosperm	Brazil	NA
NA	-28.4	-26.6	NA	NA	1.8	NA	Hietz et al 2005	Diglyme	Cedrela sp. and Swietenia sp.	Holocene	Post-industrial	NA	Angiosperm	Brazil	NA
NA	-28.4	-26.5	NA	NA	1.9	NA	Hietz et al 2005	Diglyme	Cedrela sp. and Swietenia sp.	Holocene	Post-industrial	NA	Angiosperm	Brazil	NA
NA	-28.3	-26.7	NA	NA	1.6	NA	Hietz et al 2005	Diglyme	Cedrela sp. and Swietenia sp.	Holocene	Post-industrial	NA	Angiosperm	Brazil	NA
NA	-28.1	-26.8	NA	NA	1.3	NA	Hietz et al 2005	Diglyme	Cedrela sp. and Swietenia sp.	Holocene	Post-industrial	NA	Angiosperm	Brazil	NA
NA	-28.2	-26.8	NA	NA	1.4	NA	Hietz et al 2005	Diglyme	Cedrela sp. and Swietenia sp.	Holocene	Post-industrial	NA	Angiosperm	Brazil	NA
NA	-28	-26.9	NA	NA	1.1	NA	Hietz et al 2005	Diglyme	Cedrela sp. and Swietenia sp.	Holocene	Post-industrial	NA	Angiosperm	Brazil	NA
NA	-28.1	-26.4	NA	NA	1.7	NA	Hietz et al 2005	Diglyme	Cedrela sp. and Swietenia sp.	Holocene	Post-industrial	NA	Angiosperm	Brazil	NA
NA	-28.3	-26.4	NA	NA	1.9	NA	Hietz et al 2005	Diglyme	Cedrela sp. and Swietenia sp.	Holocene	Post-industrial	NA	Angiosperm	Brazil	NA
NA	-28.6	-26.4	NA	NA	2.2	NA	Hietz et al 2005	Diglyme	Cedrela sp. and Swietenia sp.	Holocene	Post-industrial	NA	Angiosperm	Brazil	NA
NA	-28.4	-26.5	NA	NA	1.9	NA	Hietz et al 2005	Diglyme	Cedrela sp. and Swietenia sp.	Holocene	Post-industrial	NA	Angiosperm	Brazil	NA
NA	-28.2	-26	NA	NA	2.2	NA	Hietz et al 2005	Diglyme	Cedrela sp. and Swietenia sp.	Holocene	Post-industrial	NA	Angiosperm	Brazil	NA
NA	-28.6	-26	NA	NA	2.6	NA	Hietz et al 2005	Diglyme	Cedrela sp. and Swietenia sp.	Holocene	Post-industrial	NA	Angiosperm	Brazil	NA
NA	-28.1	-25.9	NA	NA	2.2	NA	Hietz et al 2005	Diglyme	Cedrela sp. and Swietenia sp.	Holocene	Post-industrial	NA	Angiosperm	Brazil	NA
NA	-27.9	-25.8	NA	NA	2.1	NA	Hietz et al 2005	Diglyme	Cedrela sp. and Swietenia sp.	Holocene	Post-industrial	NA	Angiosperm	Brazil	NA
NA	-27.7	-26	NA	NA	1.7	NA	Hietz et al 2005	Diglyme	Cedrela sp. and Swietenia sp.	Holocene	Post-industrial	NA	Angiosperm	Brazil	NA
NA	-27.6	-26.1	NA	NA	1.5	NA	Hietz et al 2005	Diglyme	Cedrela sp. and Swietenia sp.	Holocene	Post-industrial	NA	Angiosperm	Brazil	NA
NA	-27.7	-26.3	NA	NA	1.4	NA	Hietz et al 2005	Diglyme	Cedrela sp. and Swietenia sp.	Holocene	Post-industrial	NA	Angiosperm	Brazil	NA
NA	-27.5	-26.4	NA	NA	1.1	NA	Hietz et al 2005	Diglyme	Cedrela sp. and Swietenia sp.	Holocene	Post-industrial	NA	Angiosperm	Brazil	NA
NA	-27.6	-25.9	NA	NA	1.7	NA	Hietz et al 2005	Diglyme	Cedrela sp. and Swietenia sp.	Holocene	Post-industrial	NA	Angiosperm	Brazil	NA
NA	-27.5	-25.9	NA	NA	1.6	NA	Hietz et al 2005	Diglyme	Cedrela sp. and Swietenia sp.	Holocene	Post-industrial	NA	Angiosperm	Brazil	NA
NA	-27.4	-26.1	NA	NA	1.3	NA	Hietz et al 2005	Diglyme	Cedrela sp. and Swietenia sp.	Holocene	Post-industrial	NA	Angiosperm	Brazil	NA
NA	-27.4	-26.1	NA	NA	1.3	NA	Hietz et al 2005	Diglyme	Cedrela sp. and Swietenia sp.	Holocene	Post-industrial	NA	Angiosperm	Brazil	NA
NA	-27.3	-25.9	NA	NA	1.4	NA	Hietz et al 2005	Diglyme	Cedrela sp. and Swietenia sp.	Holocene	Post-industrial	NA	Angiosperm	Brazil	NA
NA	-27.1	-25.7	NA	NA	1.4	NA	Hietz et al 2005	Diglyme	Cedrela sp. and Swietenia sp.	Holocene	Post-industrial	NA	Angiosperm	Brazil	NA
NA	-27.2	-25.5	NA	NA	1.7	NA	Hietz et al 2005	Diglyme	Cedrela sp. and Swietenia sp.	Holocene	Post-industrial	NA	Angiosperm	Brazil	NA
NA	-27.2	-25.7	NA	NA	1.5	NA	Hietz et al 2005	Diglyme	Cedrela sp. and Swietenia sp.	Holocene	Post-industrial	NA	Angiosperm	Brazil	NA
NA	-27	-25.5	NA	NA	1.5	NA	Hietz et al 2005	Diglyme	Cedrela sp. and Swietenia sp.	Holocene	Post-industrial	NA	Angiosperm	Brazil	NA
NA	-27	-25.4	NA	NA	1.6	NA	Hietz et al 2005	Diglyme	Cedrela sp. and Swietenia sp.	Holocene	Post-industrial	NA	Angiosperm	Brazil	NA
NA	-27.3	-25.3	NA	NA	2	NA	Hietz et al 2005	Diglyme	Cedrela sp. and Swietenia sp.	Holocene	Post-industrial	NA	Angiosperm	Brazil	NA
NA	-27.3	-25.4	NA	NA	1.9	NA	Hietz et al 2005	Diglyme	Cedrela sp. and Swietenia sp.	Holocene	Post-industrial	NA	Angiosperm	Brazil	NA
NA	-27.3	-25.4	NA	NA	1.9	NA	Hietz et al 2005	Diglyme	Cedrela sp. and Swietenia sp.	Holocene	Post-industrial	NA	Angiosperm	Brazil	NA
NA	-26.8	-25.3	NA	NA	1.5	NA	Hietz et al 2005	Diglyme	Cedrela sp. and Swietenia sp.	Holocene	Post-industrial	NA	Angiosperm	Brazil	NA
NA	-26.7	-25.1	NA	NA	1.6	NA	Hietz et al 2005	Diglyme	Cedrela sp. and Swietenia sp.	Holocene	Post-industrial	NA	Angiosperm	Brazil	NA
NA	-26.4	-25.7	NA	NA	0.7	NA	Hietz et al 2005	Diglyme	Cedrela sp. and Swietenia sp.	Holocene	Post-industrial	NA	Angiosperm	Brazil	NA
NA	-26.4	-26.1	NA	NA	0.3	NA	Hietz et al 2005	Diglyme	Cedrela sp. and Swietenia sp.	Holocene	Post-industrial	NA	Angiosperm	Brazil	NA
NA	-23.6	-22.2	NA	NA	1.4	NA	Leavitt and Long 1982	Jayme-Wise	Juniperus deppeana	Holocene	Post-industrial	Evergreen	Gymnosperm	NA	1978-1979 CE
NA	-22.9	-21	NA	NA	1.9	NA	Leavitt and Long 1982	Jayme-Wise	Juniperus deppeana	Holocene	Post-industrial	Evergreen	Gymnosperm	NA	1978-1979 CE
NA	-22.5	-20.8	NA	NA	1.7	NA	Leavitt and Long 1982	Jayme-Wise	Juniperus deppeana	Holocene	Post-industrial	Evergreen	Gymnosperm	NA	1978-1979 CE
NA	-23.2	-22	NA	NA	1.2	NA	Leavitt and Long 1982	Jayme-Wise	Juniperus deppeana	Holocene	Post-industrial	Evergreen	Gymnosperm	NA	1978-1979 CE
NA	-22.5	-21.6	NA	NA	0.9	NA	Leavitt and Long 1982	Jayme-Wise	Juniperus deppeana	Holocene	Post-industrial	Evergreen	Gymnosperm	NA	1978-1979 CE
NA	-21.9	-20.8	NA	NA	1.1	NA	Leavitt and Long 1982	Jayme-Wise	Juniperus deppeana	Holocene	Post-industrial	Evergreen	Gymnosperm	NA	1978-1979 CE
NA	-21.6	-20.5	NA	NA	1.1	NA	Leavitt and Long 1982	Jayme-Wise	Juniperus deppeana	Holocene	Post-industrial	Evergreen	Gymnosperm	NA	1978-1979 CE
NA	-23.4	-21.2	NA	NA	2.2	NA	Leavitt and Long 1991	Jayme-Wise	Pseudotsuga menziesii	Holocene	Post-industrial	Evergreen	Gymnosperm	NA	1908-1909 CE
NA	-23.1	-20.7	NA	NA	2.4	NA	Leavitt and Long 1991	Jayme-Wise	Pseudotsuga menziesii	Holocene	Post-industrial	Evergreen	Gymnosperm	NA	1908-1909 CE
NA	-23	-21.2	NA	NA	1.8	NA	Leavitt and Long 1991	Jayme-Wise	Pseudotsuga menziesii	Holocene	Post-industrial	Evergreen	Gymnosperm	NA	1908-1909 CE
NA	-23.7	-22	NA	NA	1.7	NA	Leavitt and Long 1991	Jayme-Wise	Pseudotsuga menziesii	Holocene	Post-industrial	Evergreen	Gymnosperm	NA	1908-1909 CE
NA	-24	-21.3	NA	NA	2.7	NA	Leavitt and Long 1991	Jayme-Wise	Pseudotsuga menziesii	Holocene	Post-industrial	Evergreen	Gymnosperm	NA	1908-1909 CE
NA	-23.1	-21	NA	NA	2.1	NA	Leavitt and Long 1991	Jayme-Wise	Pseudotsuga menziesii	Holocene	Post-industrial	Evergreen	Gymnosperm	NA	1908-1909 CE
NA	-23	-20.8	NA	NA	2.2	NA	Leavitt and Long 1991	Jayme-Wise	Pseudotsuga menziesii	Holocene	Post-industrial	Evergreen	Gymnosperm	NA	1908-1909 CE
NA	-23.7	-21.8	NA	NA	1.9	NA	Leavitt and Long 1991	Jayme-Wise	Pseudotsuga menziesii	Holocene	Post-industrial	Evergreen	Gymnosperm	NA	1908-1909 CE
NA	-22.7	-20.8	NA	NA	1.9	NA	Leavitt and Long 1991	Jayme-Wise	Pinus ponderosa	Holocene	Post-industrial	Evergreen	Gymnosperm	NA	1908-1909 CE
NA	-22.1	-20.4	NA	NA	1.7	NA	Leavitt and Long 1991	Jayme-Wise	Pinus ponderosa	Holocene	Post-industrial	Evergreen	Gymnosperm	NA	1908-1909 CE
NA	-23	-21.5	NA	NA	1.5	NA	Leavitt and Long 1991	Jayme-Wise	Pinus ponderosa	Holocene	Post-industrial	Evergreen	Gymnosperm	NA	1908-1909 CE
NA	-23.7	-22.2	NA	NA	1.5	NA	Leavitt and Long 1991	Jayme-Wise	Pinus ponderosa	Holocene	Post-industrial	Evergreen	Gymnosperm	NA	1908-1909 CE
NA	-22	-20.2	NA	NA	1.8	NA	Leavitt and Long 1991	Jayme-Wise	Pinus ponderosa	Holocene	Post-industrial	Evergreen	Gymnosperm	NA	1908-1909 CE
NA	-21.2	-19.2	NA	NA	2	NA	Leavitt and Long 1991	Jayme-Wise	Pinus ponderosa	Holocene	Post-industrial	Evergreen	Gymnosperm	NA	1908-1909 CE
NA	-21.8	-20.4	NA	NA	1.4	NA	Leavitt and Long 1991	Jayme-Wise	Pinus ponderosa	Holocene	Post-industrial	Evergreen	Gymnosperm	NA	1908-1909 CE
NA	-24.3	-22	NA	NA	2.3	NA	Leavitt and Long 1991	Jayme-Wise	Pinus ponderosa	Holocene	Post-industrial	Evergreen	Gymnosperm	NA	1908-1909 CE
NA	-23.2	-21	NA	NA	2.2	NA	Leavitt and Long 1991	Jayme-Wise	Pinus ponderosa	Holocene	Post-industrial	Evergreen	Gymnosperm	NA	1908-1909 CE
NA	-22.7	-20.8	NA	NA	1.9	NA	Leavitt and Long 1991	Jayme-Wise	Pinus ponderosa	Holocene	Post-industrial	Evergreen	Gymnosperm	NA	1908-1909 CE
NA	-23.1	-21.4	NA	NA	1.7	NA	Leavitt and Long 1991	Jayme-Wise	Pinus ponderosa	Holocene	Post-industrial	Evergreen	Gymnosperm	NA	1908-1909 CE
NA	-23.7	-22	NA	NA	1.7	NA	Leavitt and Long 1991	Jayme-Wise	Pinus ponderosa	Holocene	Post-industrial	Evergreen	Gymnosperm	NA	1908-1909 CE
NA	-23.9	-22.4	NA	NA	1.5	NA	Leavitt and Long 1991	Jayme-Wise	Pinus ponderosa	Holocene	Post-industrial	Evergreen	Gymnosperm	NA	1908-1909 CE
NA	-23.3	-21.3	NA	NA	2	NA	Leavitt and Long 1991	Jayme-Wise	Pinus ponderosa	Holocene	Post-industrial	Evergreen	Gymnosperm	NA	1908-1909 CE
NA	-22.7	-20.8	NA	NA	1.9	NA	Leavitt and Long 1991	Jayme-Wise	Pinus ponderosa	Holocene	Post-industrial	Evergreen	Gymnosperm	NA	1908-1909 CE
NA	-22.6	-20.7	NA	NA	1.9	NA	Leavitt and Long 1991	Jayme-Wise	Pinus ponderosa	Holocene	Post-industrial	Evergreen	Gymnosperm	NA	1908-1909 CE
NA	-23	-20.9	NA	NA	2.1	NA	Leavitt and Long 1991	Jayme-Wise	Pinus ponderosa	Holocene	Post-industrial	Evergreen	Gymnosperm	NA	1908-1909 CE
NA	-24.1	-22.5	NA	NA	1.6	NA	Leavitt and Long 1991	Jayme-Wise	Pinus ponderosa	Holocene	Post-industrial	Evergreen	Gymnosperm	NA	1908-1909 CE
NA	-24.4	-23.2	NA	NA	1.2	NA	Leavitt and Long 1991	Jayme-Wise	Pseudotsuga menziesii	Holocene	Post-industrial	Evergreen	Gymnosperm	NA	1908-1909 CE
NA	-23.4	-22.6	NA	NA	0.8	NA	Leavitt and Long 1991	Jayme-Wise	Pseudotsuga menziesii	Holocene	Post-industrial	Evergreen	Gymnosperm	NA	1908-1909 CE
NA	-23.8	-22	NA	NA	1.8	NA	Leavitt and Long 1991	Jayme-Wise	Pseudotsuga menziesii	Holocene	Post-industrial	Evergreen	Gymnosperm	NA	1908-1909 CE
NA	-24.4	-23.8	NA	NA	0.6	NA	Leavitt and Long 1991	Jayme-Wise	Pseudotsuga menziesii	Holocene	Post-industrial	Evergreen	Gymnosperm	NA	1908-1909 CE
NA	-25.3	-23.8	NA	NA	1.5	NA	Leavitt and Long 1991	Jayme-Wise	Pseudotsuga menziesii	Holocene	Post-industrial	Evergreen	Gymnosperm	NA	1908-1909 CE
NA	-24.4	-23.3	NA	NA	1.1	NA	Leavitt and Long 1991	Jayme-Wise	Pseudotsuga menziesii	Holocene	Post-industrial	Evergreen	Gymnosperm	NA	1908-1909 CE
NA	-23.2	-22	NA	NA	1.2	NA	Leavitt and Long 1991	Jayme-Wise	Pseudotsuga menziesii	Holocene	Post-industrial	Evergreen	Gymnosperm	NA	1908-1909 CE
NA	-25	-23.8	NA	NA	1.2	NA	Leavitt and Long 1991	Jayme-Wise	Pseudotsuga menziesii	Holocene	Post-industrial	Evergreen	Gymnosperm	NA	1908-1909 CE
NA	-24.7	-23.3	NA	NA	1.4	NA	Leavitt and Long 1991	Jayme-Wise	Pseudotsuga menziesii	Holocene	Post-industrial	Evergreen	Gymnosperm	NA	1908-1909 CE
NA	-26.3	-24.1	NA	NA	2.2	NA	Leavitt and Long 1991	Jayme-Wise	Pseudotsuga menziesii	Holocene	Post-industrial	Evergreen	Gymnosperm	NA	1908-1909 CE
NA	-24.7	-23.5	NA	NA	1.2	NA	Leavitt and Long 1991	Jayme-Wise	Pseudotsuga menziesii	Holocene	Post-industrial	Evergreen	Gymnosperm	NA	1916-1917 CE
NA	-24.2	-22.3	NA	NA	1.9	NA	Leavitt and Long 1991	Jayme-Wise	Pseudotsuga menziesii	Holocene	Post-industrial	Evergreen	Gymnosperm	NA	1916-1917 CE
NA	-23.7	-22.2	NA	NA	1.5	NA	Leavitt and Long 1991	Jayme-Wise	Pseudotsuga menziesii	Holocene	Post-industrial	Evergreen	Gymnosperm	NA	1916-1917 CE
NA	-25.2	-22.8	NA	NA	2.4	NA	Leavitt and Long 1991	Jayme-Wise	Pseudotsuga menziesii	Holocene	Post-industrial	Evergreen	Gymnosperm	NA	1916-1917 CE
NA	-25.4	-24	NA	NA	1.4	NA	Leavitt and Long 1991	Jayme-Wise	Pseudotsuga menziesii	Holocene	Post-industrial	Evergreen	Gymnosperm	NA	1916-1917 CE
NA	-25.3	-24	NA	NA	1.3	NA	Leavitt and Long 1991	Jayme-Wise	Pseudotsuga menziesii	Holocene	Post-industrial	Evergreen	Gymnosperm	NA	1916-1917 CE
NA	-25.5	-24.1	NA	NA	1.4	NA	Leavitt and Long 1991	Jayme-Wise	Pseudotsuga menziesii	Holocene	Post-industrial	Evergreen	Gymnosperm	NA	1916-1917 CE
NA	-25.3	-24.2	NA	NA	1.1	NA	Leavitt and Long 1991	Jayme-Wise	Pseudotsuga menziesii	Holocene	Post-industrial	Evergreen	Gymnosperm	NA	1916-1917 CE
NA	-24.5	-23.3	NA	NA	1.2	NA	Leavitt and Long 1991	Jayme-Wise	Pseudotsuga menziesii	Holocene	Post-industrial	Evergreen	Gymnosperm	NA	1916-1917 CE
NA	-24.7	-23.8	NA	NA	0.9	NA	Leavitt and Long 1991	Jayme-Wise	Pseudotsuga menziesii	Holocene	Post-industrial	Evergreen	Gymnosperm	NA	1916-1917 CE
NA	-24	-22.3	NA	NA	1.7	NA	Leavitt and Long 1991	Jayme-Wise	Acer saccharinum	Holocene	Post-industrial	Deciduous	Angiosperm	NA	1978-1979 CE
NA	-25.1	-23.2	NA	NA	1.9	NA	Leavitt and Long 1991	Jayme-Wise	Acer saccharinum	Holocene	Post-industrial	Deciduous	Angiosperm	NA	1978-1979 CE
NA	-25.8	-23.8	NA	NA	2	NA	Leavitt and Long 1991	Jayme-Wise	Acer saccharinum	Holocene	Post-industrial	Deciduous	Angiosperm	NA	1978-1979 CE
NA	-26.2	-24.3	NA	NA	1.9	NA	Leavitt and Long 1991	Jayme-Wise	Acer saccharinum	Holocene	Post-industrial	Deciduous	Angiosperm	NA	1978-1979 CE
NA	-26.8	-24.6	NA	NA	2.2	NA	Leavitt and Long 1991	Jayme-Wise	Acer saccharinum	Holocene	Post-industrial	Deciduous	Angiosperm	NA	1978-1979 CE
NA	-26.9	-24.5	NA	NA	2.4	NA	Leavitt and Long 1991	Jayme-Wise	Acer saccharinum	Holocene	Post-industrial	Deciduous	Angiosperm	NA	1978-1979 CE
NA	-25	-23	NA	NA	2	NA	Leavitt and Long 1991	Jayme-Wise	Acer saccharinum	Holocene	Post-industrial	Deciduous	Angiosperm	NA	1978-1979 CE
NA	-24.9	-22.9	NA	NA	2	NA	Leavitt and Long 1991	Jayme-Wise	Acer saccharinum	Holocene	Post-industrial	Deciduous	Angiosperm	NA	1978-1979 CE
NA	-24.4	-22.5	NA	NA	1.9	NA	Leavitt and Long 1991	Jayme-Wise	Acer saccharinum	Holocene	Post-industrial	Deciduous	Angiosperm	NA	1978-1979 CE
NA	-24.4	-22.3	NA	NA	2.1	NA	Leavitt and Long 1991	Jayme-Wise	Acer saccharinum	Holocene	Post-industrial	Deciduous	Angiosperm	NA	1978-1979 CE
NA	-24.8	-22.9	NA	NA	1.9	NA	Leavitt and Long 1991	Jayme-Wise	Acer saccharinum	Holocene	Post-industrial	Deciduous	Angiosperm	NA	1978-1979 CE
NA	-24.6	-22.8	NA	NA	1.8	NA	Leavitt and Long 1991	Jayme-Wise	Juniperus occidentalis	Holocene	Post-industrial	Evergreen	Gymnosperm	NA	1977-1979 CE
NA	-24.3	-22.5	NA	NA	1.8	NA	Leavitt and Long 1991	Jayme-Wise	Juniperus occidentalis	Holocene	Post-industrial	Evergreen	Gymnosperm	NA	1977-1979 CE
NA	-23.9	-22.6	NA	NA	1.3	NA	Leavitt and Long 1991	Jayme-Wise	Juniperus occidentalis	Holocene	Post-industrial	Evergreen	Gymnosperm	NA	1977-1979 CE
NA	-23.7	-22	NA	NA	1.7	NA	Leavitt and Long 1991	Jayme-Wise	Juniperus occidentalis	Holocene	Post-industrial	Evergreen	Gymnosperm	NA	1977-1979 CE
NA	-23.6	-22.2	NA	NA	1.4	NA	Leavitt and Long 1991	Jayme-Wise	Juniperus deppeana	Holocene	Post-industrial	Evergreen	Gymnosperm	NA	1978-1979 CE
NA	-22.9	-21	NA	NA	1.9	NA	Leavitt and Long 1991	Jayme-Wise	Juniperus deppeana	Holocene	Post-industrial	Evergreen	Gymnosperm	NA	1978-1979 CE
NA	-22.5	-20.8	NA	NA	1.7	NA	Leavitt and Long 1991	Jayme-Wise	Juniperus deppeana	Holocene	Post-industrial	Evergreen	Gymnosperm	NA	1978-1979 CE
NA	-23.2	-21.9	NA	NA	1.3	NA	Leavitt and Long 1991	Jayme-Wise	Juniperus deppeana	Holocene	Post-industrial	Evergreen	Gymnosperm	NA	1978-1979 CE
NA	-22.5	-21.6	NA	NA	0.9	NA	Leavitt and Long 1991	Jayme-Wise	Juniperus deppeana	Holocene	Post-industrial	Evergreen	Gymnosperm	NA	1978-1979 CE
NA	-21.9	-20.7	NA	NA	1.2	NA	Leavitt and Long 1991	Jayme-Wise	Juniperus deppeana	Holocene	Post-industrial	Evergreen	Gymnosperm	NA	1978-1979 CE
NA	-21.6	-20.4	NA	NA	1.2	NA	Leavitt and Long 1991	Jayme-Wise	Juniperus deppeana	Holocene	Post-industrial	Evergreen	Gymnosperm	NA	1978-1979 CE
NA	-24	-22	NA	NA	2	NA	Leavitt and Long 1991	Jayme-Wise	Prosopis juliflora	Holocene	Post-industrial	Deciduous	Angiosperm	NA	NA
NA	-24.1	-22.4	NA	NA	1.7	NA	Leavitt and Long 1991	Jayme-Wise	Prosopis juliflora	Holocene	Post-industrial	Deciduous	Angiosperm	NA	NA
NA	-24.9	-23.8	NA	NA	1.1	NA	Leavitt and Long 1991	Jayme-Wise	Prosopis juliflora	Holocene	Post-industrial	Deciduous	Angiosperm	NA	NA
NA	-25.6	-24.4	NA	NA	1.2	NA	Leavitt and Long 1991	Jayme-Wise	Prosopis juliflora	Holocene	Post-industrial	Deciduous	Angiosperm	NA	NA
NA	-24.6	-23.2	NA	NA	1.4	NA	Leavitt and Long 1991	Jayme-Wise	Prosopis juliflora	Holocene	Post-industrial	Deciduous	Angiosperm	NA	NA
NA	-25.3	-23.9	NA	NA	1.4	NA	Leavitt and Long 1991	Jayme-Wise	Prosopis juliflora	Holocene	Post-industrial	Deciduous	Angiosperm	NA	NA
NA	-24.5	-22.6	NA	NA	1.9	NA	Leavitt and Long 1991	Jayme-Wise	Prosopis juliflora	Holocene	Post-industrial	Deciduous	Angiosperm	NA	NA
NA	-25	-23.2	NA	NA	1.8	NA	Leavitt and Long 1991	Jayme-Wise	Prosopis juliflora	Holocene	Post-industrial	Deciduous	Angiosperm	NA	NA
NA	-29.3	-28.3	NA	NA	1	NA	Livingston and Spittlehouse 1996	Jayme-Wise	Pseudotsuga menziesi	Holocene	Post-industrial	Evergreen	Gymnosperm	NA	1962-1981 CE
NA	-28.9	-26.3	NA	NA	2.6	NA	Livingston and Spittlehouse 1996	Jayme-Wise	Pseudotsuga menziesi	Holocene	Post-industrial	Evergreen	Gymnosperm	NA	NA
NA	-28.7	-26.4	NA	NA	2.3	NA	Livingston and Spittlehouse 1996	Jayme-Wise	Pseudotsuga menziesi	Holocene	Post-industrial	Evergreen	Gymnosperm	NA	NA
NA	-28.6	-25.8	NA	NA	2.8	NA	Livingston and Spittlehouse 1996	Jayme-Wise	Pseudotsuga menziesi	Holocene	Post-industrial	Evergreen	Gymnosperm	NA	NA
NA	-28.5	-26.8	NA	NA	1.7	NA	Livingston and Spittlehouse 1996	Jayme-Wise	Pseudotsuga menziesi	Holocene	Post-industrial	Evergreen	Gymnosperm	NA	NA
NA	-28.1	-25.9	NA	NA	2.2	NA	Livingston and Spittlehouse 1996	Jayme-Wise	Pseudotsuga menziesi	Holocene	Post-industrial	Evergreen	Gymnosperm	NA	NA
NA	-27.7	-25.3	NA	NA	2.4	NA	Livingston and Spittlehouse 1996	Jayme-Wise	Pseudotsuga menziesi	Holocene	Post-industrial	Evergreen	Gymnosperm	NA	NA
NA	-27.6	-25.4	NA	NA	2.2	NA	Livingston and Spittlehouse 1996	Jayme-Wise	Pseudotsuga menziesi	Holocene	Post-industrial	Evergreen	Gymnosperm	NA	NA
NA	-27.2	-25.9	NA	NA	1.3	NA	Livingston and Spittlehouse 1996	Jayme-Wise	Pseudotsuga menziesi	Holocene	Post-industrial	Evergreen	Gymnosperm	NA	NA
NA	-26.9	-24.7	NA	NA	2.2	NA	Livingston and Spittlehouse 1996	Jayme-Wise	Pseudotsuga menziesi	Holocene	Post-industrial	Evergreen	Gymnosperm	NA	NA
NA	-26.9	-25.2	NA	NA	1.7	NA	Livingston and Spittlehouse 1996	Jayme-Wise	Pseudotsuga menziesi	Holocene	Post-industrial	Evergreen	Gymnosperm	NA	NA
NA	-26.8	-25.5	NA	NA	1.3	NA	Livingston and Spittlehouse 1996	Jayme-Wise	Pseudotsuga menziesi	Holocene	Post-industrial	Evergreen	Gymnosperm	NA	NA
NA	-27	-23.6	NA	NA	3.4	NA	Livingston and Spittlehouse 1996	Jayme-Wise	Pseudotsuga menziesi	Holocene	Post-industrial	Evergreen	Gymnosperm	NA	NA
NA	-26.6	-24	NA	NA	2.6	NA	Livingston and Spittlehouse 1996	Jayme-Wise	Pseudotsuga menziesi	Holocene	Post-industrial	Evergreen	Gymnosperm	NA	NA
NA	-26.2	-24.3	NA	NA	1.9	NA	Livingston and Spittlehouse 1996	Jayme-Wise	Pseudotsuga menziesi	Holocene	Post-industrial	Evergreen	Gymnosperm	NA	NA
NA	-26.3	-25.1	NA	NA	1.2	NA	Livingston and Spittlehouse 1996	Jayme-Wise	Pseudotsuga menziesi	Holocene	Post-industrial	Evergreen	Gymnosperm	NA	NA
NA	-26.2	-24.8	NA	NA	1.4	NA	Livingston and Spittlehouse 1996	Jayme-Wise	Pseudotsuga menziesi	Holocene	Post-industrial	Evergreen	Gymnosperm	NA	NA
NA	-25.8	-24	NA	NA	1.8	NA	Livingston and Spittlehouse 1996	Jayme-Wise	Pseudotsuga menziesi	Holocene	Post-industrial	Evergreen	Gymnosperm	NA	NA
NA	-25.5	-26.3	NA	NA	-0.8	NA	Livingston and Spittlehouse 1996	Jayme-Wise	Pseudotsuga menziesi	Holocene	Post-industrial	Evergreen	Gymnosperm	NA	NA
NA	-25.6	-24.5	NA	NA	1.1	NA	Livingston and Spittlehouse 1996	Jayme-Wise	Pseudotsuga menziesi	Holocene	Post-industrial	Evergreen	Gymnosperm	NA	NA
NA	-25	-23.2	NA	NA	1.8	NA	Livingston and Spittlehouse 1996	Jayme-Wise	Pseudotsuga menziesi	Holocene	Post-industrial	Evergreen	Gymnosperm	NA	NA
NA	-24.7	-23.2	NA	NA	1.5	NA	Livingston and Spittlehouse 1996	Jayme-Wise	Pseudotsuga menziesi	Holocene	Post-industrial	Evergreen	Gymnosperm	NA	NA
NA	-24.4	-22.7	NA	NA	1.7	NA	Livingston and Spittlehouse 1996	Jayme-Wise	Pseudotsuga menziesi	Holocene	Post-industrial	Evergreen	Gymnosperm	NA	NA
NA	-24.2	-23.3	NA	NA	0.9	NA	Livingston and Spittlehouse 1996	Jayme-Wise	Pseudotsuga menziesi	Holocene	Post-industrial	Evergreen	Gymnosperm	NA	NA
NA	-24.1	-22.4	NA	NA	1.7	NA	Livingston and Spittlehouse 1996	Jayme-Wise	Pseudotsuga menziesi	Holocene	Post-industrial	Evergreen	Gymnosperm	NA	NA
NA	-23.2	-22.2	NA	NA	1	NA	Livingston and Spittlehouse 1996	Jayme-Wise	Pseudotsuga menziesi	Holocene	Post-industrial	Evergreen	Gymnosperm	NA	NA
NA	-23.2	-22	NA	NA	1.2	NA	Livingston and Spittlehouse 1996	Jayme-Wise	Pseudotsuga menziesi	Holocene	Post-industrial	Evergreen	Gymnosperm	NA	NA
NA	-26	-24.8	NA	NA	1.2	NA	Loader et al 2003	Jayme-Wise	Quercus robur	Holocene	Post-industrial	Deciduous	Angiosperm	SE United Kingdom	1978-1979 CE
NA	-25.6	-24.5	NA	NA	1.1	NA	Loader et al 2003	Jayme-Wise	Quercus robur	Holocene	Post-industrial	Deciduous	Angiosperm	SE United Kingdom	1978-1979 CE
NA	-25.5	-24.2	NA	NA	1.3	NA	Loader et al 2003	Jayme-Wise	Quercus robur	Holocene	Post-industrial	Deciduous	Angiosperm	SE United Kingdom	1978-1979 CE
NA	-26.2	-25	NA	NA	1.2	NA	Loader et al 2003	Jayme-Wise	Quercus robur	Holocene	Post-industrial	Deciduous	Angiosperm	SE United Kingdom	1978-1979 CE
NA	-26.9	-25.6	NA	NA	1.3	NA	Loader et al 2003	Jayme-Wise	Quercus robur	Holocene	Post-industrial	Deciduous	Angiosperm	SE United Kingdom	1978-1979 CE
NA	-26.4	-25.5	NA	NA	0.9	NA	Loader et al 2003	Jayme-Wise	Quercus robur	Holocene	Post-industrial	Deciduous	Angiosperm	SE United Kingdom	1978-1979 CE
NA	-26.5	-25.6	NA	NA	0.9	NA	Loader et al 2003	Jayme-Wise	Quercus robur	Holocene	Post-industrial	Deciduous	Angiosperm	SE United Kingdom	1978-1979 CE
NA	-26	-24.9	NA	NA	1.1	NA	Loader et al 2003	Jayme-Wise	Quercus robur	Holocene	Post-industrial	Deciduous	Angiosperm	SE United Kingdom	1978-1979 CE
NA	-26.2	-25.2	NA	NA	1	NA	Loader et al 2003	Jayme-Wise	Quercus robur	Holocene	Post-industrial	Deciduous	Angiosperm	SE United Kingdom	1978-1979 CE
NA	-25.6	-24.4	NA	NA	1.2	NA	Loader et al 2003	Jayme-Wise	Quercus robur	Holocene	Post-industrial	Deciduous	Angiosperm	SE United Kingdom	1978-1979 CE
NA	-25.9	-24.7	NA	NA	1.2	NA	Loader et al 2003	Jayme-Wise	Quercus robur	Holocene	Post-industrial	Deciduous	Angiosperm	SE United Kingdom	1978-1979 CE
NA	-26.4	-25.1	NA	NA	1.3	NA	Loader et al 2003	Jayme-Wise	Quercus robur	Holocene	Post-industrial	Deciduous	Angiosperm	SE United Kingdom	1978-1979 CE
NA	-26.1	-24.8	NA	NA	1.3	NA	Loader et al 2003	Jayme-Wise	Quercus robur	Holocene	Post-industrial	Deciduous	Angiosperm	SE United Kingdom	1978-1979 CE
NA	-26.2	-24.8	NA	NA	1.4	NA	Loader et al 2003	Jayme-Wise	Quercus robur	Holocene	Post-industrial	Deciduous	Angiosperm	SE United Kingdom	1978-1979 CE
NA	-26.5	-25.4	NA	NA	1.1	NA	Loader et al 2003	Jayme-Wise	Quercus robur	Holocene	Post-industrial	Deciduous	Angiosperm	SE United Kingdom	1978-1979 CE
NA	-25.7	-24.3	NA	NA	1.4	NA	Loader et al 2003	Jayme-Wise	Quercus robur	Holocene	Post-industrial	Deciduous	Angiosperm	SE United Kingdom	1978-1979 CE
NA	-26	-24.6	NA	NA	1.4	NA	Loader et al 2003	Jayme-Wise	Quercus robur	Holocene	Post-industrial	Deciduous	Angiosperm	SE United Kingdom	1978-1979 CE
NA	-26.4	-25.2	NA	NA	1.2	NA	Loader et al 2003	Jayme-Wise	Quercus robur	Holocene	Post-industrial	Deciduous	Angiosperm	SE United Kingdom	1978-1979 CE
NA	-25.8	-24.4	NA	NA	1.4	NA	Loader et al 2003	Jayme-Wise	Quercus robur	Holocene	Post-industrial	Deciduous	Angiosperm	SE United Kingdom	1978-1979 CE
NA	-26	-24.8	NA	NA	1.2	NA	Loader et al 2003	Jayme-Wise	Quercus robur	Holocene	Post-industrial	Deciduous	Angiosperm	SE United Kingdom	1978-1979 CE
NA	-26	-24.6	NA	NA	1.4	NA	Loader et al 2003	Jayme-Wise	Quercus robur	Holocene	Post-industrial	Deciduous	Angiosperm	SE United Kingdom	1978-1979 CE
NA	-25.9	-24.3	NA	NA	1.6	NA	Loader et al 2003	Jayme-Wise	Quercus robur	Holocene	Post-industrial	Deciduous	Angiosperm	SE United Kingdom	1978-1979 CE
NA	-26.2	-25.3	NA	NA	0.9	NA	Loader et al 2003	Jayme-Wise	Quercus robur	Holocene	Post-industrial	Deciduous	Angiosperm	SE United Kingdom	1978-1979 CE
NA	-26.5	-25.3	NA	NA	1.2	NA	Loader et al 2003	Jayme-Wise	Quercus robur	Holocene	Post-industrial	Deciduous	Angiosperm	SE United Kingdom	1978-1979 CE
NA	-26.7	-25.6	NA	NA	1.1	NA	Loader et al 2003	Jayme-Wise	Quercus robur	Holocene	Post-industrial	Deciduous	Angiosperm	SE United Kingdom	1978-1979 CE
NA	-26.6	-25.3	NA	NA	1.3	NA	Loader et al 2003	Jayme-Wise	Quercus robur	Holocene	Post-industrial	Deciduous	Angiosperm	SE United Kingdom	1978-1979 CE
NA	-26.2	-24.8	NA	NA	1.4	NA	Loader et al 2003	Jayme-Wise	Quercus robur	Holocene	Post-industrial	Deciduous	Angiosperm	SE United Kingdom	1978-1979 CE
NA	-26.5	-25.4	NA	NA	1.1	NA	Loader et al 2003	Jayme-Wise	Quercus robur	Holocene	Post-industrial	Deciduous	Angiosperm	SE United Kingdom	1978-1979 CE
NA	-26.7	-25.5	NA	NA	1.2	NA	Loader et al 2003	Jayme-Wise	Quercus robur	Holocene	Post-industrial	Deciduous	Angiosperm	SE United Kingdom	1978-1979 CE
NA	-26.3	-25.2	NA	NA	1.1	NA	Loader et al 2003	Jayme-Wise	Quercus robur	Holocene	Post-industrial	Deciduous	Angiosperm	SE United Kingdom	1978-1979 CE
NA	-26.3	-25	NA	NA	1.3	NA	Loader et al 2003	Jayme-Wise	Quercus robur	Holocene	Post-industrial	Deciduous	Angiosperm	SE United Kingdom	1978-1979 CE
NA	-26.7	-25.3	NA	NA	1.4	NA	Loader et al 2003	Jayme-Wise	Quercus robur	Holocene	Post-industrial	Deciduous	Angiosperm	SE United Kingdom	1978-1979 CE
NA	-27.4	-26.3	NA	NA	1.1	NA	Loader et al 2003	Jayme-Wise	Quercus robur	Holocene	Post-industrial	Deciduous	Angiosperm	SE United Kingdom	1978-1979 CE
NA	-27.4	-26.2	NA	NA	1.2	NA	Loader et al 2003	Jayme-Wise	Quercus robur	Holocene	Post-industrial	Deciduous	Angiosperm	SE United Kingdom	1978-1979 CE
NA	-26.9	-25.4	NA	NA	1.5	NA	Loader et al 2003	Jayme-Wise	Quercus robur	Holocene	Post-industrial	Deciduous	Angiosperm	SE United Kingdom	1978-1979 CE
NA	-27.4	-26.2	NA	NA	1.2	NA	Loader et al 2003	Jayme-Wise	Quercus robur	Holocene	Post-industrial	Deciduous	Angiosperm	SE United Kingdom	1978-1979 CE
NA	-27.3	-26.2	NA	NA	1.1	NA	Loader et al 2003	Jayme-Wise	Quercus robur	Holocene	Post-industrial	Deciduous	Angiosperm	SE United Kingdom	1978-1979 CE
NA	-26.8	-25.6	NA	NA	1.2	NA	Loader et al 2003	Jayme-Wise	Quercus robur	Holocene	Post-industrial	Deciduous	Angiosperm	SE United Kingdom	1978-1979 CE
NA	-26.7	-25.5	NA	NA	1.2	NA	Loader et al 2003	Jayme-Wise	Quercus robur	Holocene	Post-industrial	Deciduous	Angiosperm	SE United Kingdom	1978-1979 CE
NA	-26.8	-25.6	NA	NA	1.2	NA	Loader et al 2003	Jayme-Wise	Quercus robur	Holocene	Post-industrial	Deciduous	Angiosperm	SE United Kingdom	1978-1979 CE
NA	-27	-25.9	NA	NA	1.1	NA	Loader et al 2003	Jayme-Wise	Quercus robur	Holocene	Post-industrial	Deciduous	Angiosperm	SE United Kingdom	1978-1979 CE
NA	-26.9	-25.8	NA	NA	1.1	NA	Loader et al 2003	Jayme-Wise	Quercus robur	Holocene	Post-industrial	Deciduous	Angiosperm	SE United Kingdom	1978-1979 CE
NA	-27.2	-26.2	NA	NA	1	NA	Loader et al 2003	Jayme-Wise	Quercus robur	Holocene	Post-industrial	Deciduous	Angiosperm	SE United Kingdom	1978-1979 CE
NA	-27	-25.9	NA	NA	1.1	NA	Loader et al 2003	Jayme-Wise	Quercus robur	Holocene	Post-industrial	Deciduous	Angiosperm	SE United Kingdom	1978-1979 CE
NA	-26.6	-25.5	NA	NA	1.1	NA	Loader et al 2003	Jayme-Wise	Quercus robur	Holocene	Post-industrial	Deciduous	Angiosperm	SE United Kingdom	1978-1979 CE
NA	-26.9	-25.7	NA	NA	1.2	NA	Loader et al 2003	Jayme-Wise	Quercus robur	Holocene	Post-industrial	Deciduous	Angiosperm	SE United Kingdom	1978-1979 CE
NA	-27.9	-26.8	NA	NA	1.1	NA	Loader et al 2003	Jayme-Wise	Quercus robur	Holocene	Post-industrial	Deciduous	Angiosperm	SE United Kingdom	1978-1979 CE
NA	-27.1	-26.1	NA	NA	1	NA	Loader et al 2003	Jayme-Wise	Quercus robur	Holocene	Post-industrial	Deciduous	Angiosperm	SE United Kingdom	1978-1979 CE
NA	-27.6	-26.4	NA	NA	1.2	NA	Loader et al 2003	Jayme-Wise	Quercus robur	Holocene	Post-industrial	Deciduous	Angiosperm	SE United Kingdom	1978-1979 CE
NA	-27.5	-26.2	NA	NA	1.3	NA	Loader et al 2003	Jayme-Wise	Quercus robur	Holocene	Post-industrial	Deciduous	Angiosperm	SE United Kingdom	1978-1979 CE
NA	-28	-27	NA	NA	1	NA	Loader et al 2003	Jayme-Wise	Quercus robur	Holocene	Post-industrial	Deciduous	Angiosperm	SE United Kingdom	1978-1979 CE
NA	-27.6	-26.4	NA	NA	1.2	NA	Loader et al 2003	Jayme-Wise	Quercus robur	Holocene	Post-industrial	Deciduous	Angiosperm	SE United Kingdom	1978-1979 CE
NA	-28	-26.9	NA	NA	1.1	NA	Loader et al 2003	Jayme-Wise	Quercus robur	Holocene	Post-industrial	Deciduous	Angiosperm	SE United Kingdom	1978-1979 CE
NA	-28	-27.1	NA	NA	0.9	NA	Loader et al 2003	Jayme-Wise	Quercus robur	Holocene	Post-industrial	Deciduous	Angiosperm	SE United Kingdom	1978-1979 CE
NA	-27	-26.2	NA	NA	0.8	NA	Loader et al 2003	Jayme-Wise	Quercus robur	Holocene	Post-industrial	Deciduous	Angiosperm	SE United Kingdom	1978-1979 CE
NA	-24.2	-23.5	NA	NA	0.7	NA	Loader et al 2003	Jayme-Wise	Quercus robur	Holocene	Post-industrial	Deciduous	Angiosperm	SE United Kingdom	1978-1979 CE
NA	-22.8	-21.5	NA	NA	1.3	NA	Loader et al 2003	Jayme-Wise	Quercus robur	Holocene	Post-industrial	Deciduous	Angiosperm	SE United Kingdom	1978-1979 CE
NA	-23.9	-22.8	NA	NA	1.1	NA	Loader et al 2003	Jayme-Wise	Quercus robur	Holocene	Post-industrial	Deciduous	Angiosperm	SE United Kingdom	1978-1979 CE
NA	-23.4	-22.3	NA	NA	1.1	NA	Loader et al 2003	Jayme-Wise	Quercus robur	Holocene	Post-industrial	Deciduous	Angiosperm	SE United Kingdom	1978-1979 CE
NA	-23.6	-22.5	NA	NA	1.1	NA	Loader et al 2003	Jayme-Wise	Quercus robur	Holocene	Post-industrial	Deciduous	Angiosperm	SE United Kingdom	1978-1979 CE
NA	-23.6	-22.5	NA	NA	1.1	NA	Loader et al 2003	Jayme-Wise	Quercus robur	Holocene	Post-industrial	Deciduous	Angiosperm	SE United Kingdom	1978-1979 CE
NA	-23.1	-21.6	NA	NA	1.5	NA	Loader et al 2003	Jayme-Wise	Quercus robur	Holocene	Post-industrial	Deciduous	Angiosperm	SE United Kingdom	1978-1979 CE
NA	-23.8	-22.5	NA	NA	1.3	NA	Loader et al 2003	Jayme-Wise	Quercus robur	Holocene	Post-industrial	Deciduous	Angiosperm	SE United Kingdom	1978-1979 CE
NA	-24	-22.8	NA	NA	1.2	NA	Loader et al 2003	Jayme-Wise	Quercus robur	Holocene	Post-industrial	Deciduous	Angiosperm	SE United Kingdom	1978-1979 CE
NA	-22.9	-21.5	NA	NA	1.4	NA	Loader et al 2003	Jayme-Wise	Quercus robur	Holocene	Post-industrial	Deciduous	Angiosperm	SE United Kingdom	1978-1979 CE
NA	-24.1	-22.9	NA	NA	1.2	NA	Loader et al 2003	Jayme-Wise	Quercus robur	Holocene	Post-industrial	Deciduous	Angiosperm	SE United Kingdom	1978-1979 CE
NA	-23.4	-22.3	NA	NA	1.1	NA	Loader et al 2003	Jayme-Wise	Quercus robur	Holocene	Post-industrial	Deciduous	Angiosperm	SE United Kingdom	1978-1979 CE
NA	-23.7	-22.7	NA	NA	1	NA	Loader et al 2003	Jayme-Wise	Quercus robur	Holocene	Post-industrial	Deciduous	Angiosperm	SE United Kingdom	1978-1979 CE
NA	-22.7	-21.4	NA	NA	1.3	NA	Loader et al 2003	Jayme-Wise	Quercus robur	Holocene	Post-industrial	Deciduous	Angiosperm	SE United Kingdom	1978-1979 CE
NA	-24.1	-23	NA	NA	1.1	NA	Loader et al 2003	Jayme-Wise	Quercus robur	Holocene	Post-industrial	Deciduous	Angiosperm	SE United Kingdom	1978-1979 CE
NA	-24	-22.8	NA	NA	1.2	NA	Loader et al 2003	Jayme-Wise	Quercus robur	Holocene	Post-industrial	Deciduous	Angiosperm	SE United Kingdom	1978-1979 CE
NA	-24.8	-23.8	NA	NA	1	NA	Loader et al 2003	Jayme-Wise	Quercus robur	Holocene	Post-industrial	Deciduous	Angiosperm	SE United Kingdom	1978-1979 CE
NA	-24.8	-24.2	NA	NA	0.6	NA	Loader et al 2003	Jayme-Wise	Quercus robur	Holocene	Post-industrial	Deciduous	Angiosperm	SE United Kingdom	1978-1979 CE
NA	-24.6	-23.6	NA	NA	1	NA	Loader et al 2003	Jayme-Wise	Quercus robur	Holocene	Post-industrial	Deciduous	Angiosperm	SE United Kingdom	1978-1979 CE
NA	-25.4	-24.5	NA	NA	0.9	NA	Loader et al 2003	Jayme-Wise	Quercus robur	Holocene	Post-industrial	Deciduous	Angiosperm	SE United Kingdom	1978-1979 CE
NA	-25.3	-24.5	NA	NA	0.8	NA	Loader et al 2003	Jayme-Wise	Quercus robur	Holocene	Post-industrial	Deciduous	Angiosperm	SE United Kingdom	1978-1979 CE
NA	-25	-24	NA	NA	1	NA	Loader et al 2003	Jayme-Wise	Quercus robur	Holocene	Post-industrial	Deciduous	Angiosperm	SE United Kingdom	1978-1979 CE
NA	-24.9	-24	NA	NA	0.9	NA	Loader et al 2003	Jayme-Wise	Quercus robur	Holocene	Post-industrial	Deciduous	Angiosperm	SE United Kingdom	1978-1979 CE
NA	-24.6	-23.4	NA	NA	1.2	NA	Loader et al 2003	Jayme-Wise	Quercus robur	Holocene	Post-industrial	Deciduous	Angiosperm	SE United Kingdom	1978-1979 CE
NA	-24.7	-23.6	NA	NA	1.1	NA	Loader et al 2003	Jayme-Wise	Quercus robur	Holocene	Post-industrial	Deciduous	Angiosperm	SE United Kingdom	1978-1979 CE
NA	-23.9	-22.7	NA	NA	1.2	NA	Loader et al 2003	Jayme-Wise	Quercus robur	Holocene	Post-industrial	Deciduous	Angiosperm	SE United Kingdom	1978-1979 CE
NA	-24.3	-23	NA	NA	1.3	NA	Loader et al 2003	Jayme-Wise	Quercus robur	Holocene	Post-industrial	Deciduous	Angiosperm	SE United Kingdom	1978-1979 CE
NA	-24.5	-23.2	NA	NA	1.3	NA	Loader et al 2003	Jayme-Wise	Quercus robur	Holocene	Post-industrial	Deciduous	Angiosperm	SE United Kingdom	1978-1979 CE
NA	-24.5	-23.2	NA	NA	1.3	NA	Loader et al 2003	Jayme-Wise	Quercus robur	Holocene	Post-industrial	Deciduous	Angiosperm	SE United Kingdom	1978-1979 CE
NA	-23.8	-22.3	NA	NA	1.5	NA	Loader et al 2003	Jayme-Wise	Quercus robur	Holocene	Post-industrial	Deciduous	Angiosperm	SE United Kingdom	1978-1979 CE
NA	-22.9	-21.1	NA	NA	1.8	NA	Loader et al 2003	Jayme-Wise	Quercus robur	Holocene	Post-industrial	Deciduous	Angiosperm	SE United Kingdom	1978-1979 CE
NA	-25.1	-24	NA	NA	1.1	NA	Loader et al 2003	Jayme-Wise	Quercus robur	Holocene	Post-industrial	Deciduous	Angiosperm	SE United Kingdom	1978-1979 CE
NA	-25.2	-24.3	NA	NA	0.9	NA	Loader et al 2003	Jayme-Wise	Quercus robur	Holocene	Post-industrial	Deciduous	Angiosperm	SE United Kingdom	1978-1979 CE
NA	-24.9	-23.9	NA	NA	1	NA	Loader et al 2003	Jayme-Wise	Quercus robur	Holocene	Post-industrial	Deciduous	Angiosperm	SE United Kingdom	1978-1979 CE
NA	-24.6	-23.4	NA	NA	1.2	NA	Loader et al 2003	Jayme-Wise	Quercus robur	Holocene	Post-industrial	Deciduous	Angiosperm	SE United Kingdom	1978-1979 CE
NA	-24.9	-24.1	NA	NA	0.8	NA	Loader et al 2003	Jayme-Wise	Quercus robur	Holocene	Post-industrial	Deciduous	Angiosperm	SE United Kingdom	1978-1979 CE
NA	-25.2	-24.6	NA	NA	0.6	NA	Loader et al 2003	Jayme-Wise	Quercus robur	Holocene	Post-industrial	Deciduous	Angiosperm	SE United Kingdom	1978-1979 CE
NA	-24.3	-23.6	NA	NA	0.7	NA	Loader et al 2003	Jayme-Wise	Quercus robur	Holocene	Post-industrial	Deciduous	Angiosperm	SE United Kingdom	1978-1979 CE
NA	-24.6	-23.6	NA	NA	1	NA	Loader et al 2003	Jayme-Wise	Quercus robur	Holocene	Post-industrial	Deciduous	Angiosperm	SE United Kingdom	1978-1979 CE
NA	-24.9	-23.9	NA	NA	1	NA	Loader et al 2003	Jayme-Wise	Quercus robur	Holocene	Post-industrial	Deciduous	Angiosperm	SE United Kingdom	1978-1979 CE
NA	-25.4	-24.4	NA	NA	1	NA	Loader et al 2003	Jayme-Wise	Quercus robur	Holocene	Post-industrial	Deciduous	Angiosperm	SE United Kingdom	1978-1979 CE
NA	-25.3	-24.2	NA	NA	1.1	NA	Loader et al 2003	Jayme-Wise	Quercus robur	Holocene	Post-industrial	Deciduous	Angiosperm	SE United Kingdom	1978-1979 CE
NA	-25.3	-24.2	NA	NA	1.1	NA	Loader et al 2003	Jayme-Wise	Quercus robur	Holocene	Post-industrial	Deciduous	Angiosperm	SE United Kingdom	1978-1979 CE
NA	-24.4	-23.1	NA	NA	1.3	NA	Loader et al 2003	Jayme-Wise	Quercus robur	Holocene	Post-industrial	Deciduous	Angiosperm	SE United Kingdom	1978-1979 CE
NA	-24.2	-23.4	NA	NA	0.8	NA	Loader et al 2003	Jayme-Wise	Quercus robur	Holocene	Post-industrial	Deciduous	Angiosperm	SE United Kingdom	1978-1979 CE
NA	-24.6	-23.7	NA	NA	0.9	NA	Loader et al 2003	Jayme-Wise	Quercus robur	Holocene	Post-industrial	Deciduous	Angiosperm	SE United Kingdom	1978-1979 CE
NA	-25.3	-24.3	NA	NA	1	NA	Loader et al 2003	Jayme-Wise	Quercus robur	Holocene	Post-industrial	Deciduous	Angiosperm	SE United Kingdom	1978-1979 CE
NA	-24.5	-23.5	NA	NA	1	NA	Loader et al 2003	Jayme-Wise	Quercus robur	Holocene	Post-industrial	Deciduous	Angiosperm	SE United Kingdom	1978-1979 CE
NA	-24	-22.8	NA	NA	1.2	NA	Loader et al 2003	Jayme-Wise	Quercus robur	Holocene	Post-industrial	Deciduous	Angiosperm	SE United Kingdom	1978-1979 CE
NA	-23.6	-22.6	NA	NA	1	NA	Loader et al 2003	Jayme-Wise	Quercus robur	Holocene	Post-industrial	Deciduous	Angiosperm	SE United Kingdom	1978-1979 CE
NA	-24.5	-23.3	NA	NA	1.2	NA	Loader et al 2003	Jayme-Wise	Quercus robur	Holocene	Post-industrial	Deciduous	Angiosperm	SE United Kingdom	1978-1979 CE
NA	-24.9	-24	NA	NA	0.9	NA	Loader et al 2003	Jayme-Wise	Quercus robur	Holocene	Post-industrial	Deciduous	Angiosperm	SE United Kingdom	1978-1979 CE
NA	-25.2	-24.3	NA	NA	0.9	NA	Loader et al 2003	Jayme-Wise	Quercus robur	Holocene	Post-industrial	Deciduous	Angiosperm	SE United Kingdom	1978-1979 CE
NA	-25.2	-24.4	NA	NA	0.8	NA	Loader et al 2003	Jayme-Wise	Quercus robur	Holocene	Post-industrial	Deciduous	Angiosperm	SE United Kingdom	1978-1979 CE
NA	-25.4	-24.5	NA	NA	0.9	NA	Loader et al 2003	Jayme-Wise	Quercus robur	Holocene	Post-industrial	Deciduous	Angiosperm	SE United Kingdom	1978-1979 CE
NA	-23.7	-22.2	NA	NA	1.5	NA	Loader et al 2003	Jayme-Wise	Quercus robur L.	Holocene	Pre-industrial	Deciduous	Angiosperm	NA	2340-2360 BCE
NA	-24	-22.5	NA	NA	1.5	NA	Loader et al 2003	Jayme-Wise	Quercus robur L.	Holocene	Pre-industrial	Deciduous	Angiosperm	NA	2340-2360 BCE
NA	-24.1	-22.8	NA	NA	1.3	NA	Loader et al 2003	Jayme-Wise	Quercus robur L.	Holocene	Pre-industrial	Deciduous	Angiosperm	NA	2340-2360 BCE
NA	-24.7	-23.6	NA	NA	1.1	NA	Loader et al 2003	Jayme-Wise	Quercus robur L.	Holocene	Pre-industrial	Deciduous	Angiosperm	NA	2340-2360 BCE
NA	-24.4	-23.3	NA	NA	1.1	NA	Loader et al 2003	Jayme-Wise	Quercus robur L.	Holocene	Pre-industrial	Deciduous	Angiosperm	NA	2340-2360 BCE
NA	-24.2	-23.3	NA	NA	0.9	NA	Loader et al 2003	Jayme-Wise	Quercus robur L.	Holocene	Pre-industrial	Deciduous	Angiosperm	NA	2340-2360 BCE
NA	-24.8	-24.1	NA	NA	0.7	NA	Loader et al 2003	Jayme-Wise	Quercus robur L.	Holocene	Pre-industrial	Deciduous	Angiosperm	NA	2340-2360 BCE
NA	-23.9	-22.8	NA	NA	1.1	NA	Loader et al 2003	Jayme-Wise	Quercus robur L.	Holocene	Pre-industrial	Deciduous	Angiosperm	NA	2340-2360 BCE
NA	-23.7	-22.5	NA	NA	1.2	NA	Loader et al 2003	Jayme-Wise	Quercus robur L.	Holocene	Pre-industrial	Deciduous	Angiosperm	NA	2340-2360 BCE
NA	-23.6	-22.1	NA	NA	1.5	NA	Loader et al 2003	Jayme-Wise	Quercus robur L.	Holocene	Pre-industrial	Deciduous	Angiosperm	NA	2340-2360 BCE
NA	-24.3	-22.9	NA	NA	1.4	NA	Loader et al 2003	Jayme-Wise	Quercus robur L.	Holocene	Pre-industrial	Deciduous	Angiosperm	NA	2340-2360 BCE
NA	-24.2	-22.9	NA	NA	1.3	NA	Loader et al 2003	Jayme-Wise	Quercus robur L.	Holocene	Pre-industrial	Deciduous	Angiosperm	NA	2340-2360 BCE
NA	-24.7	-23.7	NA	NA	1	NA	Loader et al 2003	Jayme-Wise	Quercus robur L.	Holocene	Pre-industrial	Deciduous	Angiosperm	NA	2340-2360 BCE
NA	-24.7	-23.6	NA	NA	1.1	NA	Loader et al 2003	Jayme-Wise	Quercus robur L.	Holocene	Pre-industrial	Deciduous	Angiosperm	NA	2340-2360 BCE
NA	-25.5	-24.8	NA	NA	0.7	NA	Loader et al 2003	Jayme-Wise	Quercus robur L.	Holocene	Pre-industrial	Deciduous	Angiosperm	NA	2340-2360 BCE
NA	-24.8	-23.9	NA	NA	0.9	NA	Loader et al 2003	Jayme-Wise	Quercus robur L.	Holocene	Pre-industrial	Deciduous	Angiosperm	NA	2340-2360 BCE
NA	-24.1	-23	NA	NA	1.1	NA	Loader et al 2003	Jayme-Wise	Quercus robur L.	Holocene	Pre-industrial	Deciduous	Angiosperm	NA	2340-2360 BCE
NA	-24.2	-22.9	NA	NA	1.3	NA	Loader et al 2003	Jayme-Wise	Quercus robur L.	Holocene	Pre-industrial	Deciduous	Angiosperm	NA	2340-2360 BCE
NA	-24.5	-23.2	NA	NA	1.3	NA	Loader et al 2003	Jayme-Wise	Quercus robur L.	Holocene	Pre-industrial	Deciduous	Angiosperm	NA	2340-2360 BCE
NA	-24.8	-23.6	NA	NA	1.2	NA	Loader et al 2003	Jayme-Wise	Quercus robur L.	Holocene	Pre-industrial	Deciduous	Angiosperm	NA	2340-2360 BCE
NA	-27.9	-27.1	NA	NA	0.8	NA	MacFarlane et al 1999	Diglyme	Eucalyptus globulus	Holocene	Post-industrial	Deciduous	Angiosperm	NA	NA
NA	-27.8	-27.3	NA	NA	0.5	NA	MacFarlane et al 1999	Diglyme	Eucalyptus globulus	Holocene	Post-industrial	Deciduous	Angiosperm	NA	NA
NA	-27.5	-27.3	NA	NA	0.2	NA	MacFarlane et al 1999	Diglyme	Eucalyptus globulus	Holocene	Post-industrial	Deciduous	Angiosperm	NA	NA
NA	-27.2	-26.7	NA	NA	0.5	NA	MacFarlane et al 1999	Diglyme	Eucalyptus globulus	Holocene	Post-industrial	Deciduous	Angiosperm	NA	NA
NA	-27.4	-26.5	NA	NA	0.9	NA	MacFarlane et al 1999	Diglyme	Eucalyptus globulus	Holocene	Post-industrial	Deciduous	Angiosperm	NA	NA
NA	-27.3	-26	NA	NA	1.3	NA	MacFarlane et al 1999	Diglyme	Eucalyptus globulus	Holocene	Post-industrial	Deciduous	Angiosperm	NA	NA
NA	-27.1	-25.8	NA	NA	1.3	NA	MacFarlane et al 1999	Diglyme	Eucalyptus globulus	Holocene	Post-industrial	Deciduous	Angiosperm	NA	NA
NA	-26.8	-26.2	NA	NA	0.6	NA	MacFarlane et al 1999	Diglyme	Eucalyptus globulus	Holocene	Post-industrial	Deciduous	Angiosperm	NA	NA
NA	-26.8	-26.3	NA	NA	0.5	NA	MacFarlane et al 1999	Diglyme	Eucalyptus globulus	Holocene	Post-industrial	Deciduous	Angiosperm	NA	NA
NA	-26.8	-26.3	NA	NA	0.5	NA	MacFarlane et al 1999	Diglyme	Eucalyptus globulus	Holocene	Post-industrial	Deciduous	Angiosperm	NA	NA
NA	-26.7	-26.3	NA	NA	0.4	NA	MacFarlane et al 1999	Diglyme	Eucalyptus globulus	Holocene	Post-industrial	Deciduous	Angiosperm	NA	NA
NA	-27	-26.5	NA	NA	0.5	NA	MacFarlane et al 1999	Diglyme	Eucalyptus globulus	Holocene	Post-industrial	Deciduous	Angiosperm	NA	NA
NA	-27.1	-26.4	NA	NA	0.7	NA	MacFarlane et al 1999	Diglyme	Eucalyptus globulus	Holocene	Post-industrial	Deciduous	Angiosperm	NA	NA
NA	-26.6	-26.2	NA	NA	0.4	NA	MacFarlane et al 1999	Diglyme	Eucalyptus globulus	Holocene	Post-industrial	Deciduous	Angiosperm	NA	NA
NA	-26.7	-26.3	NA	NA	0.4	NA	MacFarlane et al 1999	Diglyme	Eucalyptus globulus	Holocene	Post-industrial	Deciduous	Angiosperm	NA	NA
NA	-26.5	-26.1	NA	NA	0.4	NA	MacFarlane et al 1999	Diglyme	Eucalyptus globulus	Holocene	Post-industrial	Deciduous	Angiosperm	NA	NA
NA	-26.5	-26	NA	NA	0.5	NA	MacFarlane et al 1999	Diglyme	Eucalyptus globulus	Holocene	Post-industrial	Deciduous	Angiosperm	NA	NA
NA	-26.5	-26	NA	NA	0.5	NA	MacFarlane et al 1999	Diglyme	Eucalyptus globulus	Holocene	Post-industrial	Deciduous	Angiosperm	NA	NA
NA	-26.7	-26	NA	NA	0.7	NA	MacFarlane et al 1999	Diglyme	Eucalyptus globulus	Holocene	Post-industrial	Deciduous	Angiosperm	NA	NA
NA	-26.3	-26	NA	NA	0.3	NA	MacFarlane et al 1999	Diglyme	Eucalyptus globulus	Holocene	Post-industrial	Deciduous	Angiosperm	NA	NA
NA	-26.3	-26.1	NA	NA	0.2	NA	MacFarlane et al 1999	Diglyme	Eucalyptus globulus	Holocene	Post-industrial	Deciduous	Angiosperm	NA	NA
NA	-26.1	-25.9	NA	NA	0.2	NA	MacFarlane et al 1999	Diglyme	Eucalyptus globulus	Holocene	Post-industrial	Deciduous	Angiosperm	NA	NA
NA	-26.3	-25.9	NA	NA	0.4	NA	MacFarlane et al 1999	Diglyme	Eucalyptus globulus	Holocene	Post-industrial	Deciduous	Angiosperm	NA	NA
NA	-26.3	-25.8	NA	NA	0.5	NA	MacFarlane et al 1999	Diglyme	Eucalyptus globulus	Holocene	Post-industrial	Deciduous	Angiosperm	NA	NA
NA	-26.4	-25.7	NA	NA	0.7	NA	MacFarlane et al 1999	Diglyme	Eucalyptus globulus	Holocene	Post-industrial	Deciduous	Angiosperm	NA	NA
NA	-26.5	-25.7	NA	NA	0.8	NA	MacFarlane et al 1999	Diglyme	Eucalyptus globulus	Holocene	Post-industrial	Deciduous	Angiosperm	NA	NA
NA	-26.3	-25.5	NA	NA	0.8	NA	MacFarlane et al 1999	Diglyme	Eucalyptus globulus	Holocene	Post-industrial	Deciduous	Angiosperm	NA	NA
NA	-26.1	-25.7	NA	NA	0.4	NA	MacFarlane et al 1999	Diglyme	Eucalyptus globulus	Holocene	Post-industrial	Deciduous	Angiosperm	NA	NA
NA	-26.4	-25.4	NA	NA	1	NA	MacFarlane et al 1999	Diglyme	Eucalyptus globulus	Holocene	Post-industrial	Deciduous	Angiosperm	NA	NA
NA	-26.3	-25.2	NA	NA	1.1	NA	MacFarlane et al 1999	Diglyme	Eucalyptus globulus	Holocene	Post-industrial	Deciduous	Angiosperm	NA	NA
NA	-25.7	-25.5	NA	NA	0.2	NA	MacFarlane et al 1999	Diglyme	Eucalyptus globulus	Holocene	Post-industrial	Deciduous	Angiosperm	NA	NA
NA	-25.7	-25.5	NA	NA	0.2	NA	MacFarlane et al 1999	Diglyme	Eucalyptus globulus	Holocene	Post-industrial	Deciduous	Angiosperm	NA	NA
NA	-25.9	-25.5	NA	NA	0.4	NA	MacFarlane et al 1999	Diglyme	Eucalyptus globulus	Holocene	Post-industrial	Deciduous	Angiosperm	NA	NA
NA	-25.9	-25.5	NA	NA	0.4	NA	MacFarlane et al 1999	Diglyme	Eucalyptus globulus	Holocene	Post-industrial	Deciduous	Angiosperm	NA	NA
NA	-26	-25.4	NA	NA	0.6	NA	MacFarlane et al 1999	Diglyme	Eucalyptus globulus	Holocene	Post-industrial	Deciduous	Angiosperm	NA	NA
NA	-26.1	-25.5	NA	NA	0.6	NA	MacFarlane et al 1999	Diglyme	Eucalyptus globulus	Holocene	Post-industrial	Deciduous	Angiosperm	NA	NA
NA	-25.8	-25.7	NA	NA	0.1	NA	MacFarlane et al 1999	Diglyme	Eucalyptus globulus	Holocene	Post-industrial	Deciduous	Angiosperm	NA	NA
NA	-25.9	-25.2	NA	NA	0.7	NA	MacFarlane et al 1999	Diglyme	Eucalyptus globulus	Holocene	Post-industrial	Deciduous	Angiosperm	NA	NA
NA	-26.1	-25.1	NA	NA	1	NA	MacFarlane et al 1999	Diglyme	Eucalyptus globulus	Holocene	Post-industrial	Deciduous	Angiosperm	NA	NA
NA	-25.7	-25.1	NA	NA	0.6	NA	MacFarlane et al 1999	Diglyme	Eucalyptus globulus	Holocene	Post-industrial	Deciduous	Angiosperm	NA	NA
NA	-25.7	-25	NA	NA	0.7	NA	MacFarlane et al 1999	Diglyme	Eucalyptus globulus	Holocene	Post-industrial	Deciduous	Angiosperm	NA	NA
NA	-25.7	-25.2	NA	NA	0.5	NA	MacFarlane et al 1999	Diglyme	Eucalyptus globulus	Holocene	Post-industrial	Deciduous	Angiosperm	NA	NA
NA	-25.5	-24.8	NA	NA	0.7	NA	MacFarlane et al 1999	Diglyme	Eucalyptus globulus	Holocene	Post-industrial	Deciduous	Angiosperm	NA	NA
NA	-25.6	-24.6	NA	NA	1	NA	MacFarlane et al 1999	Diglyme	Eucalyptus globulus	Holocene	Post-industrial	Deciduous	Angiosperm	NA	NA
NA	-25.7	-24.6	NA	NA	1.1	NA	MacFarlane et al 1999	Diglyme	Eucalyptus globulus	Holocene	Post-industrial	Deciduous	Angiosperm	NA	NA
NA	-25.8	-24.7	NA	NA	1.1	NA	MacFarlane et al 1999	Diglyme	Eucalyptus globulus	Holocene	Post-industrial	Deciduous	Angiosperm	NA	NA
NA	-25.8	-24.8	NA	NA	1	NA	MacFarlane et al 1999	Diglyme	Eucalyptus globulus	Holocene	Post-industrial	Deciduous	Angiosperm	NA	NA
NA	-25.5	-24.5	NA	NA	1	NA	MacFarlane et al 1999	Diglyme	Eucalyptus globulus	Holocene	Post-industrial	Deciduous	Angiosperm	NA	NA
NA	-25.5	-24.4	NA	NA	1.1	NA	MacFarlane et al 1999	Diglyme	Eucalyptus globulus	Holocene	Post-industrial	Deciduous	Angiosperm	NA	NA
NA	-25.5	-24.4	NA	NA	1.1	NA	MacFarlane et al 1999	Diglyme	Eucalyptus globulus	Holocene	Post-industrial	Deciduous	Angiosperm	NA	NA
NA	-25.1	-24.3	NA	NA	0.8	NA	MacFarlane et al 1999	Diglyme	Eucalyptus globulus	Holocene	Post-industrial	Deciduous	Angiosperm	NA	NA
NA	-25.3	-24.7	NA	NA	0.6	NA	MacFarlane et al 1999	Diglyme	Eucalyptus globulus	Holocene	Post-industrial	Deciduous	Angiosperm	NA	NA
NA	-25.4	-24.9	NA	NA	0.5	NA	MacFarlane et al 1999	Diglyme	Eucalyptus globulus	Holocene	Post-industrial	Deciduous	Angiosperm	NA	NA
NA	-25.3	-25	NA	NA	0.3	NA	MacFarlane et al 1999	Diglyme	Eucalyptus globulus	Holocene	Post-industrial	Deciduous	Angiosperm	NA	NA
NA	-25.1	-24.6	NA	NA	0.5	NA	MacFarlane et al 1999	Diglyme	Eucalyptus globulus	Holocene	Post-industrial	Deciduous	Angiosperm	NA	NA
NA	-24.7	-23.8	NA	NA	0.9	NA	MacFarlane et al 1999	Diglyme	Eucalyptus globulus	Holocene	Post-industrial	Deciduous	Angiosperm	NA	NA
NA	-24.7	-24.4	NA	NA	0.3	NA	MacFarlane et al 1999	Diglyme	Eucalyptus globulus	Holocene	Post-industrial	Deciduous	Angiosperm	NA	NA
NA	-24.7	-24.5	NA	NA	0.2	NA	MacFarlane et al 1999	Diglyme	Eucalyptus globulus	Holocene	Post-industrial	Deciduous	Angiosperm	NA	NA
NA	-24.9	-24.1	NA	NA	0.8	NA	MacFarlane et al 1999	Diglyme	Eucalyptus globulus	Holocene	Post-industrial	Deciduous	Angiosperm	NA	NA
NA	-26.4	-25.9	NA	NA	0.5	NA	MacFarlane et al 1999	Diglyme	Pinus sp.	Holocene	Post-industrial	Evergreen	Gymnosperm	NA	NA
NA	-26.3	-25.7	NA	NA	0.6	NA	MacFarlane et al 1999	Diglyme	Pinus sp.	Holocene	Post-industrial	Evergreen	Gymnosperm	NA	NA
NA	-25.7	-25.3	NA	NA	0.4	NA	MacFarlane et al 1999	Diglyme	Pinus sp.	Holocene	Post-industrial	Evergreen	Gymnosperm	NA	NA
NA	-25.5	-25.2	NA	NA	0.3	NA	MacFarlane et al 1999	Diglyme	Pinus sp.	Holocene	Post-industrial	Evergreen	Gymnosperm	NA	NA
NA	-25.2	-24.5	NA	NA	0.7	NA	MacFarlane et al 1999	Diglyme	Pinus sp.	Holocene	Post-industrial	Evergreen	Gymnosperm	NA	NA
NA	-24.9	-24.6	NA	NA	0.3	NA	MacFarlane et al 1999	Diglyme	Pinus sp.	Holocene	Post-industrial	Evergreen	Gymnosperm	NA	NA
NA	-24.9	-24.3	NA	NA	0.6	NA	MacFarlane et al 1999	Diglyme	Pinus sp.	Holocene	Post-industrial	Evergreen	Gymnosperm	NA	NA
NA	-25.5	-24.9	NA	NA	0.6	NA	MacFarlane et al 1999	Diglyme	Pinus sp.	Holocene	Post-industrial	Evergreen	Gymnosperm	NA	NA
NA	-24.1	-23.7	NA	NA	0.4	NA	MacFarlane et al 1999	Diglyme	Pinus sp.	Holocene	Post-industrial	Evergreen	Gymnosperm	NA	NA
NA	-24.1	-23.8	NA	NA	0.3	NA	MacFarlane et al 1999	Diglyme	Pinus sp.	Holocene	Post-industrial	Evergreen	Gymnosperm	NA	NA
NA	-24.6	-23.7	NA	NA	0.9	NA	MacFarlane et al 1999	Diglyme	Pinus sp.	Holocene	Post-industrial	Evergreen	Gymnosperm	NA	NA
NA	-23.9	-23.5	NA	NA	0.4	NA	MacFarlane et al 1999	Diglyme	Pinus sp.	Holocene	Post-industrial	Evergreen	Gymnosperm	NA	NA
NA	-24.1	-23.1	NA	NA	1	NA	MacFarlane et al 1999	Diglyme	Pinus sp.	Holocene	Post-industrial	Evergreen	Gymnosperm	NA	NA
NA	-23.9	-22.6	NA	NA	1.3	NA	MacFarlane et al 1999	Diglyme	Pinus sp.	Holocene	Post-industrial	Evergreen	Gymnosperm	NA	NA
NA	-23.1	-22.6	NA	NA	0.5	NA	MacFarlane et al 1999	Diglyme	Pinus sp.	Holocene	Post-industrial	Evergreen	Gymnosperm	NA	NA
NA	-23	-22.9	NA	NA	0.1	NA	MacFarlane et al 1999	Diglyme	Pinus sp.	Holocene	Post-industrial	Evergreen	Gymnosperm	NA	NA
NA	-22.7	-21.8	NA	NA	0.9	NA	MacFarlane et al 1999	Diglyme	Pinus sp.	Holocene	Post-industrial	Evergreen	Gymnosperm	NA	NA
NA	-25	-24.2	NA	NA	0.8	NA	MacFarlane et al 1999	Diglyme	Pinus sp.	Holocene	Post-industrial	Evergreen	Gymnosperm	NA	NA
NA	-25.5	-23.9	NA	NA	1.6	NA	MacFarlane et al 1999	Diglyme	Pinus sp.	Holocene	Post-industrial	Evergreen	Gymnosperm	NA	NA
NA	-26.2	-25.8	NA	NA	0.4	NA	MacFarlane et al 1999	Diglyme	Pinus sp.	Holocene	Post-industrial	Evergreen	Gymnosperm	NA	NA
NA	-25.1	-24.5	NA	NA	0.6	NA	MacFarlane et al 1999	Diglyme	Pinus sp.	Holocene	Post-industrial	Evergreen	Gymnosperm	NA	NA
NA	-24.9	-23.8	NA	NA	1.1	NA	MacFarlane et al 1999	Diglyme	Pinus sp.	Holocene	Post-industrial	Evergreen	Gymnosperm	NA	NA
NA	-27.2	-26.2	NA	NA	1	NA	Pons and Helle 2011	Jayme-Wise	Carapa guianensis	Holocene	Post-industrial	Deciduous	Angiosperm	Guyana	Modern
NA	-27.3	-26.3	NA	NA	1	NA	Pons and Helle 2011	Jayme-Wise	Carapa guianensis	Holocene	Post-industrial	Deciduous	Angiosperm	Guyana	Modern
NA	-27.1	-26.2	NA	NA	0.9	NA	Pons and Helle 2011	Jayme-Wise	Carapa guianensis	Holocene	Post-industrial	Deciduous	Angiosperm	Guyana	Modern
NA	-27.1	-25.9	NA	NA	1.2	NA	Pons and Helle 2011	Jayme-Wise	Carapa guianensis	Holocene	Post-industrial	Deciduous	Angiosperm	Guyana	Modern
NA	-27	-25.5	NA	NA	1.5	NA	Pons and Helle 2011	Jayme-Wise	Carapa guianensis	Holocene	Post-industrial	Deciduous	Angiosperm	Guyana	Modern
NA	-26.6	-25.1	NA	NA	1.5	NA	Pons and Helle 2011	Jayme-Wise	Carapa guianensis	Holocene	Post-industrial	Deciduous	Angiosperm	Guyana	Modern
NA	-25.9	-24.5	NA	NA	1.4	NA	Pons and Helle 2011	Jayme-Wise	Carapa guianensis	Holocene	Post-industrial	Deciduous	Angiosperm	Guyana	Modern
NA	-25.8	-24.3	NA	NA	1.5	NA	Pons and Helle 2011	Jayme-Wise	Carapa guianensis	Holocene	Post-industrial	Deciduous	Angiosperm	Guyana	Modern
NA	-25.7	-24.4	NA	NA	1.3	NA	Pons and Helle 2011	Jayme-Wise	Carapa guianensis	Holocene	Post-industrial	Deciduous	Angiosperm	Guyana	Modern
NA	-25.9	-25.2	NA	NA	0.7	NA	Pons and Helle 2011	Jayme-Wise	Carapa guianensis	Holocene	Post-industrial	Deciduous	Angiosperm	Guyana	Modern
NA	-26.4	-25.3	NA	NA	1.1	NA	Pons and Helle 2011	Jayme-Wise	Carapa guianensis	Holocene	Post-industrial	Deciduous	Angiosperm	Guyana	Modern
NA	-26.5	-25.6	NA	NA	0.9	NA	Pons and Helle 2011	Jayme-Wise	Carapa guianensis	Holocene	Post-industrial	Deciduous	Angiosperm	Guyana	Modern
NA	-26.5	-25.6	NA	NA	0.9	NA	Pons and Helle 2011	Jayme-Wise	Carapa guianensis	Holocene	Post-industrial	Deciduous	Angiosperm	Guyana	Modern
NA	-26.6	-25.6	NA	NA	1	NA	Pons and Helle 2011	Jayme-Wise	Carapa guianensis	Holocene	Post-industrial	Deciduous	Angiosperm	Guyana	Modern
NA	-26.6	-25.5	NA	NA	1.1	NA	Pons and Helle 2011	Jayme-Wise	Carapa guianensis	Holocene	Post-industrial	Deciduous	Angiosperm	Guyana	Modern
NA	-26.5	-25.4	NA	NA	1.1	NA	Pons and Helle 2011	Jayme-Wise	Carapa guianensis	Holocene	Post-industrial	Deciduous	Angiosperm	Guyana	Modern
NA	-26.4	-25.2	NA	NA	1.2	NA	Pons and Helle 2011	Jayme-Wise	Carapa guianensis	Holocene	Post-industrial	Deciduous	Angiosperm	Guyana	Modern
NA	-26.3	-24.8	NA	NA	1.5	NA	Pons and Helle 2011	Jayme-Wise	Carapa guianensis	Holocene	Post-industrial	Deciduous	Angiosperm	Guyana	Modern
NA	-26.1	-24.8	NA	NA	1.3	NA	Pons and Helle 2011	Jayme-Wise	Carapa guianensis	Holocene	Post-industrial	Deciduous	Angiosperm	Guyana	Modern
NA	-26	-25.2	NA	NA	0.8	NA	Pons and Helle 2011	Jayme-Wise	Carapa guianensis	Holocene	Post-industrial	Deciduous	Angiosperm	Guyana	Modern
NA	-26.4	-25.7	NA	NA	0.7	NA	Pons and Helle 2011	Jayme-Wise	Carapa guianensis	Holocene	Post-industrial	Deciduous	Angiosperm	Guyana	Modern
NA	-26.6	-25.3	NA	NA	1.3	NA	Pons and Helle 2011	Jayme-Wise	Carapa guianensis	Holocene	Post-industrial	Deciduous	Angiosperm	Guyana	Modern
NA	-26.4	-25.3	NA	NA	1.1	NA	Pons and Helle 2011	Jayme-Wise	Carapa guianensis	Holocene	Post-industrial	Deciduous	Angiosperm	Guyana	Modern
NA	-26.2	-25.1	NA	NA	1.1	NA	Pons and Helle 2011	Jayme-Wise	Carapa guianensis	Holocene	Post-industrial	Deciduous	Angiosperm	Guyana	Modern
NA	-26.3	-26.1	NA	NA	0.2	NA	Pons and Helle 2011	Jayme-Wise	Carapa guianensis	Holocene	Post-industrial	Deciduous	Angiosperm	Guyana	Modern
NA	-27.2	-26.6	NA	NA	0.6	NA	Pons and Helle 2011	Jayme-Wise	Carapa guianensis	Holocene	Post-industrial	Deciduous	Angiosperm	Guyana	Modern
NA	-27.5	-26.5	NA	NA	1	NA	Pons and Helle 2011	Jayme-Wise	Carapa guianensis	Holocene	Post-industrial	Deciduous	Angiosperm	Guyana	Modern
NA	-27.3	-26.4	NA	NA	0.9	NA	Pons and Helle 2011	Jayme-Wise	Carapa guianensis	Holocene	Post-industrial	Deciduous	Angiosperm	Guyana	Modern
NA	-27.1	-26.1	NA	NA	1	NA	Pons and Helle 2011	Jayme-Wise	Carapa guianensis	Holocene	Post-industrial	Deciduous	Angiosperm	Guyana	Modern
NA	-26.9	-25.8	NA	NA	1.1	NA	Pons and Helle 2011	Jayme-Wise	Carapa guianensis	Holocene	Post-industrial	Deciduous	Angiosperm	Guyana	Modern
NA	-26.7	-25.5	NA	NA	1.2	NA	Pons and Helle 2011	Jayme-Wise	Carapa guianensis	Holocene	Post-industrial	Deciduous	Angiosperm	Guyana	Modern
NA	-26.4	-25.1	NA	NA	1.3	NA	Pons and Helle 2011	Jayme-Wise	Carapa guianensis	Holocene	Post-industrial	Deciduous	Angiosperm	Guyana	Modern
NA	-26.3	-25.2	NA	NA	1.1	NA	Pons and Helle 2011	Jayme-Wise	Carapa guianensis	Holocene	Post-industrial	Deciduous	Angiosperm	Guyana	Modern
NA	-26.6	-25.5	NA	NA	1.1	NA	Pons and Helle 2011	Jayme-Wise	Carapa guianensis	Holocene	Post-industrial	Deciduous	Angiosperm	Guyana	Modern
NA	-26.5	-25.5	NA	NA	1	NA	Pons and Helle 2011	Jayme-Wise	Carapa guianensis	Holocene	Post-industrial	Deciduous	Angiosperm	Guyana	Modern
NA	-26.6	-25.4	NA	NA	1.2	NA	Pons and Helle 2011	Jayme-Wise	Carapa guianensis	Holocene	Post-industrial	Deciduous	Angiosperm	Guyana	Modern
NA	-26.4	-25.2	NA	NA	1.2	NA	Pons and Helle 2011	Jayme-Wise	Carapa guianensis	Holocene	Post-industrial	Deciduous	Angiosperm	Guyana	Modern
NA	-26.2	-24.9	NA	NA	1.3	NA	Pons and Helle 2011	Jayme-Wise	Carapa guianensis	Holocene	Post-industrial	Deciduous	Angiosperm	Guyana	Modern
NA	-26.1	-24.6	NA	NA	1.5	NA	Pons and Helle 2011	Jayme-Wise	Carapa guianensis	Holocene	Post-industrial	Deciduous	Angiosperm	Guyana	Modern
NA	-25.8	-24.3	NA	NA	1.5	NA	Pons and Helle 2011	Jayme-Wise	Carapa guianensis	Holocene	Post-industrial	Deciduous	Angiosperm	Guyana	Modern
NA	-25.9	-24.5	NA	NA	1.4	NA	Pons and Helle 2011	Jayme-Wise	Carapa guianensis	Holocene	Post-industrial	Deciduous	Angiosperm	Guyana	Modern
NA	-25.9	-24.8	NA	NA	1.1	NA	Pons and Helle 2011	Jayme-Wise	Carapa guianensis	Holocene	Post-industrial	Deciduous	Angiosperm	Guyana	Modern
NA	-26.6	-25.4	NA	NA	1.2	NA	Pons and Helle 2011	Jayme-Wise	Carapa guianensis	Holocene	Post-industrial	Deciduous	Angiosperm	Guyana	Modern
NA	-26.8	-25.3	NA	NA	1.5	NA	Pons and Helle 2011	Jayme-Wise	Carapa guianensis	Holocene	Post-industrial	Deciduous	Angiosperm	Guyana	Modern
NA	-26.6	-25	NA	NA	1.6	NA	Pons and Helle 2011	Jayme-Wise	Carapa guianensis	Holocene	Post-industrial	Deciduous	Angiosperm	Guyana	Modern
NA	-26.8	-25.5	NA	NA	1.3	NA	Pons and Helle 2011	Jayme-Wise	Carapa guianensis	Holocene	Post-industrial	Deciduous	Angiosperm	Guyana	Modern
NA	-27	-25.8	NA	NA	1.2	NA	Pons and Helle 2011	Jayme-Wise	Carapa guianensis	Holocene	Post-industrial	Deciduous	Angiosperm	Guyana	Modern
NA	-26.9	-25.5	NA	NA	1.4	NA	Pons and Helle 2011	Jayme-Wise	Carapa guianensis	Holocene	Post-industrial	Deciduous	Angiosperm	Guyana	Modern
NA	-25.8	-25	NA	NA	0.8	NA	Pons and Helle 2011	Jayme-Wise	Goupia glabra	Holocene	Post-industrial	Evergreen	Angiosperm	Guyana	Modern
NA	-26	-25.2	NA	NA	0.8	NA	Pons and Helle 2011	Jayme-Wise	Goupia glabra	Holocene	Post-industrial	Evergreen	Angiosperm	Guyana	Modern
NA	-26.3	-25.2	NA	NA	1.1	NA	Pons and Helle 2011	Jayme-Wise	Goupia glabra	Holocene	Post-industrial	Evergreen	Angiosperm	Guyana	Modern
NA	-26.3	-25.5	NA	NA	0.8	NA	Pons and Helle 2011	Jayme-Wise	Goupia glabra	Holocene	Post-industrial	Evergreen	Angiosperm	Guyana	Modern
NA	-26.3	-25.6	NA	NA	0.7	NA	Pons and Helle 2011	Jayme-Wise	Goupia glabra	Holocene	Post-industrial	Evergreen	Angiosperm	Guyana	Modern
NA	-26.1	-25.4	NA	NA	0.7	NA	Pons and Helle 2011	Jayme-Wise	Goupia glabra	Holocene	Post-industrial	Evergreen	Angiosperm	Guyana	Modern
NA	-26.1	-25.4	NA	NA	0.7	NA	Pons and Helle 2011	Jayme-Wise	Goupia glabra	Holocene	Post-industrial	Evergreen	Angiosperm	Guyana	Modern
NA	-26.4	-25.5	NA	NA	0.9	NA	Pons and Helle 2011	Jayme-Wise	Goupia glabra	Holocene	Post-industrial	Evergreen	Angiosperm	Guyana	Modern
NA	-26.6	-25.6	NA	NA	1	NA	Pons and Helle 2011	Jayme-Wise	Goupia glabra	Holocene	Post-industrial	Evergreen	Angiosperm	Guyana	Modern
NA	-26.6	-25.9	NA	NA	0.7	NA	Pons and Helle 2011	Jayme-Wise	Goupia glabra	Holocene	Post-industrial	Evergreen	Angiosperm	Guyana	Modern
NA	-26.6	-25.9	NA	NA	0.7	NA	Pons and Helle 2011	Jayme-Wise	Goupia glabra	Holocene	Post-industrial	Evergreen	Angiosperm	Guyana	Modern
NA	-26.5	-25.8	NA	NA	0.7	NA	Pons and Helle 2011	Jayme-Wise	Goupia glabra	Holocene	Post-industrial	Evergreen	Angiosperm	Guyana	Modern
NA	-26.5	-25.5	NA	NA	1	NA	Pons and Helle 2011	Jayme-Wise	Goupia glabra	Holocene	Post-industrial	Evergreen	Angiosperm	Guyana	Modern
NA	-26.8	-25.7	NA	NA	1.1	NA	Pons and Helle 2011	Jayme-Wise	Goupia glabra	Holocene	Post-industrial	Evergreen	Angiosperm	Guyana	Modern
NA	-26.9	-25.9	NA	NA	1	NA	Pons and Helle 2011	Jayme-Wise	Goupia glabra	Holocene	Post-industrial	Evergreen	Angiosperm	Guyana	Modern
NA	-26.9	-26.2	NA	NA	0.7	NA	Pons and Helle 2011	Jayme-Wise	Goupia glabra	Holocene	Post-industrial	Evergreen	Angiosperm	Guyana	Modern
NA	-26.6	-25.8	NA	NA	0.8	NA	Pons and Helle 2011	Jayme-Wise	Goupia glabra	Holocene	Post-industrial	Evergreen	Angiosperm	Guyana	Modern
NA	-26.2	-25.5	NA	NA	0.7	NA	Pons and Helle 2011	Jayme-Wise	Goupia glabra	Holocene	Post-industrial	Evergreen	Angiosperm	Guyana	Modern
NA	-26	-25.2	NA	NA	0.8	NA	Pons and Helle 2011	Jayme-Wise	Goupia glabra	Holocene	Post-industrial	Evergreen	Angiosperm	Guyana	Modern
NA	-25.7	-24.9	NA	NA	0.8	NA	Pons and Helle 2011	Jayme-Wise	Goupia glabra	Holocene	Post-industrial	Evergreen	Angiosperm	Guyana	Modern
NA	-25.6	-24.7	NA	NA	0.9	NA	Pons and Helle 2011	Jayme-Wise	Goupia glabra	Holocene	Post-industrial	Evergreen	Angiosperm	Guyana	Modern
NA	-25.6	-24.5	NA	NA	1.1	NA	Pons and Helle 2011	Jayme-Wise	Goupia glabra	Holocene	Post-industrial	Evergreen	Angiosperm	Guyana	Modern
NA	-25.5	-24.5	NA	NA	1	NA	Pons and Helle 2011	Jayme-Wise	Goupia glabra	Holocene	Post-industrial	Evergreen	Angiosperm	Guyana	Modern
NA	-25.9	-24.7	NA	NA	1.2	NA	Pons and Helle 2011	Jayme-Wise	Goupia glabra	Holocene	Post-industrial	Evergreen	Angiosperm	Guyana	Modern
NA	-26.3	-25.1	NA	NA	1.2	NA	Pons and Helle 2011	Jayme-Wise	Goupia glabra	Holocene	Post-industrial	Evergreen	Angiosperm	Guyana	Modern
NA	-26.4	-25.4	NA	NA	1	NA	Pons and Helle 2011	Jayme-Wise	Goupia glabra	Holocene	Post-industrial	Evergreen	Angiosperm	Guyana	Modern
NA	-26.1	-25.2	NA	NA	0.9	NA	Pons and Helle 2011	Jayme-Wise	Goupia glabra	Holocene	Post-industrial	Evergreen	Angiosperm	Guyana	Modern
NA	-26.1	-25.2	NA	NA	0.9	NA	Pons and Helle 2011	Jayme-Wise	Goupia glabra	Holocene	Post-industrial	Evergreen	Angiosperm	Guyana	Modern
NA	-26.2	-24.9	NA	NA	1.3	NA	Pons and Helle 2011	Jayme-Wise	Goupia glabra	Holocene	Post-industrial	Evergreen	Angiosperm	Guyana	Modern
NA	-26.9	-25.8	NA	NA	1.1	NA	Pons and Helle 2011	Jayme-Wise	Goupia glabra	Holocene	Post-industrial	Evergreen	Angiosperm	Guyana	Modern
NA	-26.9	-25.9	NA	NA	1	NA	Pons and Helle 2011	Jayme-Wise	Goupia glabra	Holocene	Post-industrial	Evergreen	Angiosperm	Guyana	Modern
NA	-26.8	-25.9	NA	NA	0.9	NA	Pons and Helle 2011	Jayme-Wise	Goupia glabra	Holocene	Post-industrial	Evergreen	Angiosperm	Guyana	Modern
NA	-26.7	-25.6	NA	NA	1.1	NA	Pons and Helle 2011	Jayme-Wise	Goupia glabra	Holocene	Post-industrial	Evergreen	Angiosperm	Guyana	Modern
NA	-26.6	-25.6	NA	NA	1	NA	Pons and Helle 2011	Jayme-Wise	Goupia glabra	Holocene	Post-industrial	Evergreen	Angiosperm	Guyana	Modern
NA	-26.4	-25.6	NA	NA	0.8	NA	Pons and Helle 2011	Jayme-Wise	Goupia glabra	Holocene	Post-industrial	Evergreen	Angiosperm	Guyana	Modern
NA	-26.3	-25.4	NA	NA	0.9	NA	Pons and Helle 2011	Jayme-Wise	Goupia glabra	Holocene	Post-industrial	Evergreen	Angiosperm	Guyana	Modern
NA	-26.2	-25.2	NA	NA	1	NA	Pons and Helle 2011	Jayme-Wise	Goupia glabra	Holocene	Post-industrial	Evergreen	Angiosperm	Guyana	Modern
NA	-26.4	-25.3	NA	NA	1.1	NA	Pons and Helle 2011	Jayme-Wise	Goupia glabra	Holocene	Post-industrial	Evergreen	Angiosperm	Guyana	Modern
NA	-26.6	-25.6	NA	NA	1	NA	Pons and Helle 2011	Jayme-Wise	Goupia glabra	Holocene	Post-industrial	Evergreen	Angiosperm	Guyana	Modern
NA	-26.4	-25.5	NA	NA	0.9	NA	Pons and Helle 2011	Jayme-Wise	Goupia glabra	Holocene	Post-industrial	Evergreen	Angiosperm	Guyana	Modern
NA	-26.3	-25.4	NA	NA	0.9	NA	Pons and Helle 2011	Jayme-Wise	Goupia glabra	Holocene	Post-industrial	Evergreen	Angiosperm	Guyana	Modern
NA	-27.2	-25.7	NA	NA	1.5	NA	Pons and Helle 2011	Jayme-Wise	Goupia glabra	Holocene	Post-industrial	Evergreen	Angiosperm	Guyana	Modern
NA	-27.2	-26.1	NA	NA	1.1	NA	Pons and Helle 2011	Jayme-Wise	Goupia glabra	Holocene	Post-industrial	Evergreen	Angiosperm	Guyana	Modern
NA	-26.9	-26.5	NA	NA	0.4	NA	Pons and Helle 2011	Jayme-Wise	Goupia glabra	Holocene	Post-industrial	Evergreen	Angiosperm	Guyana	Modern
NA	-26.8	-26.1	NA	NA	0.7	NA	Pons and Helle 2011	Jayme-Wise	Goupia glabra	Holocene	Post-industrial	Evergreen	Angiosperm	Guyana	Modern
NA	-26.8	-25.9	NA	NA	0.9	NA	Pons and Helle 2011	Jayme-Wise	Goupia glabra	Holocene	Post-industrial	Evergreen	Angiosperm	Guyana	Modern
NA	-26.4	-25.5	NA	NA	0.9	NA	Pons and Helle 2011	Jayme-Wise	Goupia glabra	Holocene	Post-industrial	Evergreen	Angiosperm	Guyana	Modern
NA	-26.4	-25.5	NA	NA	0.9	NA	Pons and Helle 2011	Jayme-Wise	Goupia glabra	Holocene	Post-industrial	Evergreen	Angiosperm	Guyana	Modern
NA	-26.3	-25.4	NA	NA	0.9	NA	Pons and Helle 2011	Jayme-Wise	Goupia glabra	Holocene	Post-industrial	Evergreen	Angiosperm	Guyana	Modern
NA	-26.4	-25.2	NA	NA	1.2	NA	Pons and Helle 2011	Jayme-Wise	Goupia glabra	Holocene	Post-industrial	Evergreen	Angiosperm	Guyana	Modern
NA	-29	-27.7	NA	NA	1.3	NA	Roden and Farquhar 2012	Jayme-Wise	Eucalyptus globulus Labill.	Holocene	Post-industrial	Evergreen	Angiosperm	NA	Modern
NA	-28.6	-27.4	NA	NA	1.2	NA	Roden and Farquhar 2012	Jayme-Wise	Eucalyptus globulus Labill.	Holocene	Post-industrial	Evergreen	Angiosperm	NA	Modern
NA	-28.4	-27.3	NA	NA	1.1	NA	Roden and Farquhar 2012	Jayme-Wise	Eucalyptus globulus Labill.	Holocene	Post-industrial	Evergreen	Angiosperm	NA	Modern
NA	-28.7	-27.2	NA	NA	1.5	NA	Roden and Farquhar 2012	Jayme-Wise	Eucalyptus globulus Labill.	Holocene	Post-industrial	Evergreen	Angiosperm	NA	Modern
NA	-28.4	-27.2	NA	NA	1.2	NA	Roden and Farquhar 2012	Jayme-Wise	Eucalyptus globulus Labill.	Holocene	Post-industrial	Evergreen	Angiosperm	NA	Modern
NA	-28.1	-27.3	NA	NA	0.8	NA	Roden and Farquhar 2012	Jayme-Wise	Eucalyptus globulus Labill.	Holocene	Post-industrial	Evergreen	Angiosperm	NA	Modern
NA	-28.2	-27.1	NA	NA	1.1	NA	Roden and Farquhar 2012	Jayme-Wise	Eucalyptus globulus Labill.	Holocene	Post-industrial	Evergreen	Angiosperm	NA	Modern
NA	-28.2	-27	NA	NA	1.2	NA	Roden and Farquhar 2012	Jayme-Wise	Eucalyptus globulus Labill.	Holocene	Post-industrial	Evergreen	Angiosperm	NA	Modern
NA	-28.1	-26.9	NA	NA	1.2	NA	Roden and Farquhar 2012	Jayme-Wise	Eucalyptus globulus Labill.	Holocene	Post-industrial	Evergreen	Angiosperm	NA	Modern
NA	-27.9	-26.8	NA	NA	1.1	NA	Roden and Farquhar 2012	Jayme-Wise	Eucalyptus globulus Labill.	Holocene	Post-industrial	Evergreen	Angiosperm	NA	Modern
NA	-28	-26.7	NA	NA	1.3	NA	Roden and Farquhar 2012	Jayme-Wise	Eucalyptus globulus Labill.	Holocene	Post-industrial	Evergreen	Angiosperm	NA	Modern
NA	-27.8	-26.6	NA	NA	1.2	NA	Roden and Farquhar 2012	Jayme-Wise	Eucalyptus globulus Labill.	Holocene	Post-industrial	Evergreen	Angiosperm	NA	Modern
NA	-27.8	-26.6	NA	NA	1.2	NA	Roden and Farquhar 2012	Jayme-Wise	Eucalyptus globulus Labill.	Holocene	Post-industrial	Evergreen	Angiosperm	NA	Modern
NA	-28.1	-26.5	NA	NA	1.6	NA	Roden and Farquhar 2012	Jayme-Wise	Eucalyptus globulus Labill.	Holocene	Post-industrial	Evergreen	Angiosperm	NA	Modern
NA	-27.6	-26.5	NA	NA	1.1	NA	Roden and Farquhar 2012	Jayme-Wise	Eucalyptus globulus Labill.	Holocene	Post-industrial	Evergreen	Angiosperm	NA	Modern
NA	-27.6	-26.4	NA	NA	1.2	NA	Roden and Farquhar 2012	Jayme-Wise	Eucalyptus globulus Labill.	Holocene	Post-industrial	Evergreen	Angiosperm	NA	Modern
NA	-27.8	-26.4	NA	NA	1.4	NA	Roden and Farquhar 2012	Jayme-Wise	Eucalyptus globulus Labill.	Holocene	Post-industrial	Evergreen	Angiosperm	NA	Modern
NA	-27.3	-26.1	NA	NA	1.2	NA	Roden and Farquhar 2012	Jayme-Wise	Eucalyptus globulus Labill.	Holocene	Post-industrial	Evergreen	Angiosperm	NA	Modern
NA	-27.2	-26.1	NA	NA	1.1	NA	Roden and Farquhar 2012	Jayme-Wise	Eucalyptus globulus Labill.	Holocene	Post-industrial	Evergreen	Angiosperm	NA	Modern
NA	-26.9	-26	NA	NA	0.9	NA	Roden and Farquhar 2012	Jayme-Wise	Eucalyptus globulus Labill.	Holocene	Post-industrial	Evergreen	Angiosperm	NA	Modern
NA	-27	-25.7	NA	NA	1.3	NA	Roden and Farquhar 2012	Jayme-Wise	Eucalyptus globulus Labill.	Holocene	Post-industrial	Evergreen	Angiosperm	NA	Modern
NA	-27	-25.6	NA	NA	1.4	NA	Roden and Farquhar 2012	Jayme-Wise	Eucalyptus globulus Labill.	Holocene	Post-industrial	Evergreen	Angiosperm	NA	Modern
NA	-26.6	-25.7	NA	NA	0.9	NA	Roden and Farquhar 2012	Jayme-Wise	Eucalyptus globulus Labill.	Holocene	Post-industrial	Evergreen	Angiosperm	NA	Modern
NA	-26.5	-25.6	NA	NA	0.9	NA	Roden and Farquhar 2012	Jayme-Wise	Eucalyptus globulus Labill.	Holocene	Post-industrial	Evergreen	Angiosperm	NA	Modern
NA	-26.8	-25.6	NA	NA	1.2	NA	Roden and Farquhar 2012	Jayme-Wise	Eucalyptus globulus Labill.	Holocene	Post-industrial	Evergreen	Angiosperm	NA	Modern
NA	-26.8	-25.5	NA	NA	1.3	NA	Roden and Farquhar 2012	Jayme-Wise	Eucalyptus globulus Labill.	Holocene	Post-industrial	Evergreen	Angiosperm	NA	Modern
NA	-26.9	-25.4	NA	NA	1.5	NA	Roden and Farquhar 2012	Jayme-Wise	Eucalyptus globulus Labill.	Holocene	Post-industrial	Evergreen	Angiosperm	NA	Modern
NA	-26.7	-25.5	NA	NA	1.2	NA	Roden and Farquhar 2012	Jayme-Wise	Eucalyptus globulus Labill.	Holocene	Post-industrial	Evergreen	Angiosperm	NA	Modern
NA	-26.6	-25.5	NA	NA	1.1	NA	Roden and Farquhar 2012	Jayme-Wise	Eucalyptus globulus Labill.	Holocene	Post-industrial	Evergreen	Angiosperm	NA	Modern
NA	-26.5	-25.4	NA	NA	1.1	NA	Roden and Farquhar 2012	Jayme-Wise	Eucalyptus globulus Labill.	Holocene	Post-industrial	Evergreen	Angiosperm	NA	Modern
NA	-26.3	-25.6	NA	NA	0.7	NA	Roden and Farquhar 2012	Jayme-Wise	Eucalyptus globulus Labill.	Holocene	Post-industrial	Evergreen	Angiosperm	NA	Modern
NA	-26.1	-25.1	NA	NA	1	NA	Roden and Farquhar 2012	Jayme-Wise	Eucalyptus globulus Labill.	Holocene	Post-industrial	Evergreen	Angiosperm	NA	Modern
NA	-26.2	-25	NA	NA	1.2	NA	Roden and Farquhar 2012	Jayme-Wise	Eucalyptus globulus Labill.	Holocene	Post-industrial	Evergreen	Angiosperm	NA	Modern
NA	-26.3	-24.9	NA	NA	1.4	NA	Roden and Farquhar 2012	Jayme-Wise	Eucalyptus globulus Labill.	Holocene	Post-industrial	Evergreen	Angiosperm	NA	Modern
NA	-25.9	-24.9	NA	NA	1	NA	Roden and Farquhar 2012	Jayme-Wise	Eucalyptus globulus Labill.	Holocene	Post-industrial	Evergreen	Angiosperm	NA	Modern
NA	-25.8	-24.7	NA	NA	1.1	NA	Roden and Farquhar 2012	Jayme-Wise	Eucalyptus globulus Labill.	Holocene	Post-industrial	Evergreen	Angiosperm	NA	Modern
NA	-25.6	-24.6	NA	NA	1	NA	Roden and Farquhar 2012	Jayme-Wise	Eucalyptus globulus Labill.	Holocene	Post-industrial	Evergreen	Angiosperm	NA	Modern
NA	-25.8	-24.3	NA	NA	1.5	NA	Roden and Farquhar 2012	Jayme-Wise	Eucalyptus globulus Labill.	Holocene	Post-industrial	Evergreen	Angiosperm	NA	Modern
NA	-28.1	-27.1	NA	NA	1	NA	Roden and Farquhar 2012	Jayme-Wise	Pinus radiata	Holocene	Post-industrial	Evergreen	Gymnosperm	NA	Modern
NA	-27.4	-26.6	NA	NA	0.8	NA	Roden and Farquhar 2012	Jayme-Wise	Pinus radiata	Holocene	Post-industrial	Evergreen	Gymnosperm	NA	Modern
NA	-27.5	-26.5	NA	NA	1	NA	Roden and Farquhar 2012	Jayme-Wise	Pinus radiata	Holocene	Post-industrial	Evergreen	Gymnosperm	NA	Modern
NA	-27	-26.3	NA	NA	0.7	NA	Roden and Farquhar 2012	Jayme-Wise	Pinus radiata	Holocene	Post-industrial	Evergreen	Gymnosperm	NA	Modern
NA	-26.9	-26.2	NA	NA	0.7	NA	Roden and Farquhar 2012	Jayme-Wise	Pinus radiata	Holocene	Post-industrial	Evergreen	Gymnosperm	NA	Modern
NA	-26.9	-25.9	NA	NA	1	NA	Roden and Farquhar 2012	Jayme-Wise	Pinus radiata	Holocene	Post-industrial	Evergreen	Gymnosperm	NA	Modern
NA	-26.7	-26.1	NA	NA	0.6	NA	Roden and Farquhar 2012	Jayme-Wise	Pinus radiata	Holocene	Post-industrial	Evergreen	Gymnosperm	NA	Modern
NA	-26.3	-25.6	NA	NA	0.7	NA	Roden and Farquhar 2012	Jayme-Wise	Pinus radiata	Holocene	Post-industrial	Evergreen	Gymnosperm	NA	Modern
NA	-26.3	-25.5	NA	NA	0.8	NA	Roden and Farquhar 2012	Jayme-Wise	Pinus radiata	Holocene	Post-industrial	Evergreen	Gymnosperm	NA	Modern
NA	-25.8	-25.1	NA	NA	0.7	NA	Roden and Farquhar 2012	Jayme-Wise	Pinus radiata	Holocene	Post-industrial	Evergreen	Gymnosperm	NA	Modern
NA	-25.8	-24.9	NA	NA	0.9	NA	Roden and Farquhar 2012	Jayme-Wise	Pinus radiata	Holocene	Post-industrial	Evergreen	Gymnosperm	NA	Modern
NA	-25.5	-24.8	NA	NA	0.7	NA	Roden and Farquhar 2012	Jayme-Wise	Pinus radiata	Holocene	Post-industrial	Evergreen	Gymnosperm	NA	Modern
NA	-25.4	-24.6	NA	NA	0.8	NA	Roden and Farquhar 2012	Jayme-Wise	Pinus radiata	Holocene	Post-industrial	Evergreen	Gymnosperm	NA	Modern
NA	-25	-23.8	NA	NA	1.2	NA	Roden and Farquhar 2012	Jayme-Wise	Pinus radiata	Holocene	Post-industrial	Evergreen	Gymnosperm	NA	Modern
NA	-24.7	-23.7	NA	NA	1	NA	Roden and Farquhar 2012	Jayme-Wise	Pinus radiata	Holocene	Post-industrial	Evergreen	Gymnosperm	NA	Modern
NA	-24.4	-23.5	NA	NA	0.9	NA	Roden and Farquhar 2012	Jayme-Wise	Pinus radiata	Holocene	Post-industrial	Evergreen	Gymnosperm	NA	Modern
NA	-24.4	-23.5	NA	NA	0.9	NA	Roden and Farquhar 2012	Jayme-Wise	Pinus radiata	Holocene	Post-industrial	Evergreen	Gymnosperm	NA	Modern
NA	-25.6	-24.7	NA	NA	0.9	NA	Sass-Klaassmenn et al 2005	Jayme-Wise	Quercus sp.	Holocene	Pre-industrial	Deciduous	Angiosperm	E. Netherlands	137 BCE - 193 CE
NA	-26.8	-25.1	NA	NA	1.7	NA	Sass-Klaassmenn et al 2005	Jayme-Wise	Quercus sp.	Holocene	Pre-industrial	Deciduous	Angiosperm	E. Netherlands	138 BCE - 193 CE
NA	-28	-26.3	NA	NA	1.7	NA	Sass-Klaassmenn et al 2005	Jayme-Wise	Quercus sp.	Holocene	Pre-industrial	Deciduous	Angiosperm	E. Netherlands	139 BCE - 193 CE
NA	-27.5	-26	NA	NA	1.5	NA	Sass-Klaassmenn et al 2005	Jayme-Wise	Quercus sp.	Holocene	Pre-industrial	Deciduous	Angiosperm	E. Netherlands	140 BCE - 193 CE
NA	-27.3	-26.2	NA	NA	1.1	NA	Sass-Klaassmenn et al 2005	Jayme-Wise	Quercus sp.	Holocene	Pre-industrial	Deciduous	Angiosperm	E. Netherlands	141 BCE - 193 CE
NA	-26.6	-24.5	NA	NA	2.1	NA	Sass-Klaassmenn et al 2005	Jayme-Wise	Quercus sp.	Holocene	Pre-industrial	Deciduous	Angiosperm	E. Netherlands	142 BCE - 193 CE
NA	-26.8	-25.7	NA	NA	1.1	NA	Sass-Klaassmenn et al 2005	Jayme-Wise	Quercus sp.	Holocene	Pre-industrial	Deciduous	Angiosperm	E. Netherlands	143 BCE - 193 CE
NA	-27.4	-26.4	NA	NA	1	NA	Sass-Klaassmenn et al 2005	Jayme-Wise	Quercus sp.	Holocene	Pre-industrial	Deciduous	Angiosperm	E. Netherlands	144 BCE - 193 CE
NA	-26.2	-25	NA	NA	1.2	NA	Sass-Klaassmenn et al 2005	Jayme-Wise	Quercus sp.	Holocene	Pre-industrial	Deciduous	Angiosperm	E. Netherlands	145 BCE - 193 CE
NA	-26.6	-25.9	NA	NA	0.7	NA	Sass-Klaassmenn et al 2005	Jayme-Wise	Quercus sp.	Holocene	Pre-industrial	Deciduous	Angiosperm	E. Netherlands	146 BCE - 193 CE
NA	-26.3	-25.7	NA	NA	0.6	NA	Sass-Klaassmenn et al 2005	Jayme-Wise	Quercus sp.	Holocene	Pre-industrial	Deciduous	Angiosperm	E. Netherlands	147 BCE - 193 CE
NA	-26.9	-26	NA	NA	0.9	NA	Sass-Klaassmenn et al 2005	Jayme-Wise	Quercus sp.	Holocene	Pre-industrial	Deciduous	Angiosperm	E. Netherlands	148 BCE - 193 CE
NA	-26.1	-25.5	NA	NA	0.6	NA	Sass-Klaassmenn et al 2005	Jayme-Wise	Quercus sp.	Holocene	Pre-industrial	Deciduous	Angiosperm	E. Netherlands	149 BCE - 193 CE
NA	-26.5	-25.6	NA	NA	0.9	NA	Sass-Klaassmenn et al 2005	Jayme-Wise	Quercus sp.	Holocene	Pre-industrial	Deciduous	Angiosperm	E. Netherlands	150 BCE - 193 CE
NA	-26.6	-25.4	NA	NA	1.2	NA	Sass-Klaassmenn et al 2005	Jayme-Wise	Quercus sp.	Holocene	Pre-industrial	Deciduous	Angiosperm	E. Netherlands	151 BCE - 193 CE
NA	-26.3	-25.3	NA	NA	1	NA	Sass-Klaassmenn et al 2005	Jayme-Wise	Quercus sp.	Holocene	Pre-industrial	Deciduous	Angiosperm	E. Netherlands	152 BCE - 193 CE
NA	-27.1	-25.9	NA	NA	1.2	NA	Sass-Klaassmenn et al 2005	Jayme-Wise	Quercus sp.	Holocene	Pre-industrial	Deciduous	Angiosperm	E. Netherlands	153 BCE - 193 CE
NA	-27	-25.9	NA	NA	1.1	NA	Sass-Klaassmenn et al 2005	Jayme-Wise	Quercus sp.	Holocene	Pre-industrial	Deciduous	Angiosperm	E. Netherlands	154 BCE - 193 CE
NA	-26.9	-25.6	NA	NA	1.3	NA	Sass-Klaassmenn et al 2005	Jayme-Wise	Quercus sp.	Holocene	Pre-industrial	Deciduous	Angiosperm	E. Netherlands	155 BCE - 193 CE
NA	-27.1	-25.7	NA	NA	1.4	NA	Sass-Klaassmenn et al 2005	Jayme-Wise	Quercus sp.	Holocene	Pre-industrial	Deciduous	Angiosperm	E. Netherlands	156 BCE - 193 CE
NA	-27.1	-25.5	NA	NA	1.6	NA	Sass-Klaassmenn et al 2005	Jayme-Wise	Quercus sp.	Holocene	Pre-industrial	Deciduous	Angiosperm	E. Netherlands	157 BCE - 193 CE
NA	-27.4	-25.4	NA	NA	2	NA	Sass-Klaassmenn et al 2005	Jayme-Wise	Quercus sp.	Holocene	Pre-industrial	Deciduous	Angiosperm	E. Netherlands	158 BCE - 193 CE
NA	-27.2	-25.5	NA	NA	1.7	NA	Sass-Klaassmenn et al 2005	Jayme-Wise	Quercus sp.	Holocene	Pre-industrial	Deciduous	Angiosperm	E. Netherlands	159 BCE - 193 CE
NA	-25.8	-23.7	NA	NA	2.1	NA	Sidorova et al 2008	Jayme-Wise	Larix cajanderi Mayr	Holocene	Post-industrial	Deciduous	Gymnosperm	NE Russia	1880-2004 CE
NA	-25.9	-23.7	NA	NA	2.2	NA	Sidorova et al 2008	Jayme-Wise	Larix cajanderi Mayr	Holocene	Post-industrial	Deciduous	Gymnosperm	NE Russia	1880-2004 CE
NA	-26	-23.6	NA	NA	2.4	NA	Sidorova et al 2008	Jayme-Wise	Larix cajanderi Mayr	Holocene	Post-industrial	Deciduous	Gymnosperm	NE Russia	1880-2004 CE
NA	-26.3	-24.4	NA	NA	1.9	NA	Sidorova et al 2008	Jayme-Wise	Larix cajanderi Mayr	Holocene	Post-industrial	Deciduous	Gymnosperm	NE Russia	1880-2004 CE
NA	-26.5	-24.3	NA	NA	2.2	NA	Sidorova et al 2008	Jayme-Wise	Larix cajanderi Mayr	Holocene	Post-industrial	Deciduous	Gymnosperm	NE Russia	1880-2004 CE
NA	-26.9	-25.1	NA	NA	1.8	NA	Sidorova et al 2008	Jayme-Wise	Larix cajanderi Mayr	Holocene	Post-industrial	Deciduous	Gymnosperm	NE Russia	1880-2004 CE
NA	-27	-25.4	NA	NA	1.6	NA	Sidorova et al 2008	Jayme-Wise	Larix cajanderi Mayr	Holocene	Post-industrial	Deciduous	Gymnosperm	NE Russia	1880-2004 CE
NA	-26.6	-25.1	NA	NA	1.5	NA	Sidorova et al 2008	Jayme-Wise	Larix cajanderi Mayr	Holocene	Post-industrial	Deciduous	Gymnosperm	NE Russia	1880-2004 CE
NA	-26.3	-24.3	NA	NA	2	NA	Sidorova et al 2008	Jayme-Wise	Larix cajanderi Mayr	Holocene	Post-industrial	Deciduous	Gymnosperm	NE Russia	1880-2004 CE
NA	-26.6	-24.5	NA	NA	2.1	NA	Sidorova et al 2008	Jayme-Wise	Larix cajanderi Mayr	Holocene	Post-industrial	Deciduous	Gymnosperm	NE Russia	1880-2004 CE
NA	-26.8	-24.9	NA	NA	1.9	NA	Sidorova et al 2008	Jayme-Wise	Larix cajanderi Mayr	Holocene	Post-industrial	Deciduous	Gymnosperm	NE Russia	1880-2004 CE
NA	-26.3	-24.3	NA	NA	2	NA	Sidorova et al 2008	Jayme-Wise	Larix cajanderi Mayr	Holocene	Post-industrial	Deciduous	Gymnosperm	NE Russia	1880-2004 CE
NA	-26.3	-24.3	NA	NA	2	NA	Sidorova et al 2008	Jayme-Wise	Larix cajanderi Mayr	Holocene	Post-industrial	Deciduous	Gymnosperm	NE Russia	1880-2004 CE
NA	-26.3	-24.5	NA	NA	1.8	NA	Sidorova et al 2008	Jayme-Wise	Larix cajanderi Mayr	Holocene	Post-industrial	Deciduous	Gymnosperm	NE Russia	1880-2004 CE
NA	-26	-23.7	NA	NA	2.3	NA	Sidorova et al 2008	Jayme-Wise	Larix cajanderi Mayr	Holocene	Post-industrial	Deciduous	Gymnosperm	NE Russia	1880-2004 CE
NA	-26.2	-23.6	NA	NA	2.6	NA	Sidorova et al 2008	Jayme-Wise	Larix cajanderi Mayr	Holocene	Post-industrial	Deciduous	Gymnosperm	NE Russia	1880-2004 CE
NA	-26.2	-23.7	NA	NA	2.5	NA	Sidorova et al 2008	Jayme-Wise	Larix cajanderi Mayr	Holocene	Post-industrial	Deciduous	Gymnosperm	NE Russia	1880-2004 CE
NA	-26	-23.5	NA	NA	2.5	NA	Sidorova et al 2008	Jayme-Wise	Larix cajanderi Mayr	Holocene	Post-industrial	Deciduous	Gymnosperm	NE Russia	1880-2004 CE
NA	-25.9	-23.4	NA	NA	2.5	NA	Sidorova et al 2008	Jayme-Wise	Larix cajanderi Mayr	Holocene	Post-industrial	Deciduous	Gymnosperm	NE Russia	1880-2004 CE
NA	-26.2	-23.8	NA	NA	2.4	NA	Sidorova et al 2008	Jayme-Wise	Larix cajanderi Mayr	Holocene	Post-industrial	Deciduous	Gymnosperm	NE Russia	1880-2004 CE
NA	-25.9	-23.9	NA	NA	2	NA	Sidorova et al 2008	Jayme-Wise	Larix cajanderi Mayr	Holocene	Post-industrial	Deciduous	Gymnosperm	NE Russia	1880-2004 CE
NA	-26.3	-24.3	NA	NA	2	NA	Sidorova et al 2008	Jayme-Wise	Larix cajanderi Mayr	Holocene	Post-industrial	Deciduous	Gymnosperm	NE Russia	1880-2004 CE
NA	-26	-24.1	NA	NA	1.9	NA	Sidorova et al 2008	Jayme-Wise	Larix cajanderi Mayr	Holocene	Post-industrial	Deciduous	Gymnosperm	NE Russia	1880-2004 CE
NA	-25.9	-24.1	NA	NA	1.8	NA	Sidorova et al 2008	Jayme-Wise	Larix cajanderi Mayr	Holocene	Post-industrial	Deciduous	Gymnosperm	NE Russia	1880-2004 CE
NA	-26.1	-24.2	NA	NA	1.9	NA	Sidorova et al 2008	Jayme-Wise	Larix cajanderi Mayr	Holocene	Post-industrial	Deciduous	Gymnosperm	NE Russia	1880-2004 CE
NA	-26.4	-24.5	NA	NA	1.9	NA	Sidorova et al 2008	Jayme-Wise	Larix cajanderi Mayr	Holocene	Post-industrial	Deciduous	Gymnosperm	NE Russia	1880-2004 CE
NA	-26.3	-24.8	NA	NA	1.5	NA	Sidorova et al 2008	Jayme-Wise	Larix cajanderi Mayr	Holocene	Post-industrial	Deciduous	Gymnosperm	NE Russia	1880-2004 CE
NA	-26.1	-24.1	NA	NA	2	NA	Sidorova et al 2008	Jayme-Wise	Larix cajanderi Mayr	Holocene	Post-industrial	Deciduous	Gymnosperm	NE Russia	1880-2004 CE
NA	-25.8	-23.7	NA	NA	2.1	NA	Sidorova et al 2008	Jayme-Wise	Larix cajanderi Mayr	Holocene	Post-industrial	Deciduous	Gymnosperm	NE Russia	1880-2004 CE
NA	-26.3	-24.4	NA	NA	1.9	NA	Sidorova et al 2008	Jayme-Wise	Larix cajanderi Mayr	Holocene	Post-industrial	Deciduous	Gymnosperm	NE Russia	1880-2004 CE
NA	-26.1	-24.3	NA	NA	1.8	NA	Sidorova et al 2008	Jayme-Wise	Larix cajanderi Mayr	Holocene	Post-industrial	Deciduous	Gymnosperm	NE Russia	1880-2004 CE
NA	-25.8	-23.8	NA	NA	2	NA	Sidorova et al 2008	Jayme-Wise	Larix cajanderi Mayr	Holocene	Post-industrial	Deciduous	Gymnosperm	NE Russia	1880-2004 CE
NA	-25.6	-23.6	NA	NA	2	NA	Sidorova et al 2008	Jayme-Wise	Larix cajanderi Mayr	Holocene	Post-industrial	Deciduous	Gymnosperm	NE Russia	1880-2004 CE
NA	-25.8	-23.7	NA	NA	2.1	NA	Sidorova et al 2008	Jayme-Wise	Larix cajanderi Mayr	Holocene	Post-industrial	Deciduous	Gymnosperm	NE Russia	1880-2004 CE
NA	-26.2	-23.8	NA	NA	2.4	NA	Sidorova et al 2008	Jayme-Wise	Larix cajanderi Mayr	Holocene	Post-industrial	Deciduous	Gymnosperm	NE Russia	1880-2004 CE
NA	-26.2	-24.5	NA	NA	1.7	NA	Sidorova et al 2008	Jayme-Wise	Larix cajanderi Mayr	Holocene	Post-industrial	Deciduous	Gymnosperm	NE Russia	1880-2004 CE
NA	-26.4	-24.8	NA	NA	1.6	NA	Sidorova et al 2008	Jayme-Wise	Larix cajanderi Mayr	Holocene	Post-industrial	Deciduous	Gymnosperm	NE Russia	1880-2004 CE
NA	-26.1	-25	NA	NA	1.1	NA	Sidorova et al 2008	Jayme-Wise	Larix cajanderi Mayr	Holocene	Post-industrial	Deciduous	Gymnosperm	NE Russia	1880-2004 CE
NA	-26.3	-24.8	NA	NA	1.5	NA	Sidorova et al 2008	Jayme-Wise	Larix cajanderi Mayr	Holocene	Post-industrial	Deciduous	Gymnosperm	NE Russia	1880-2004 CE
NA	-26.2	-24.7	NA	NA	1.5	NA	Sidorova et al 2008	Jayme-Wise	Larix cajanderi Mayr	Holocene	Post-industrial	Deciduous	Gymnosperm	NE Russia	1880-2004 CE
NA	-26.2	-24.8	NA	NA	1.4	NA	Sidorova et al 2008	Jayme-Wise	Larix cajanderi Mayr	Holocene	Post-industrial	Deciduous	Gymnosperm	NE Russia	1880-2004 CE
NA	-26.2	-24.9	NA	NA	1.3	NA	Sidorova et al 2008	Jayme-Wise	Larix cajanderi Mayr	Holocene	Post-industrial	Deciduous	Gymnosperm	NE Russia	1880-2004 CE
NA	-26.1	-24.8	NA	NA	1.3	NA	Sidorova et al 2008	Jayme-Wise	Larix cajanderi Mayr	Holocene	Post-industrial	Deciduous	Gymnosperm	NE Russia	1880-2004 CE
NA	-26.2	-24.7	NA	NA	1.5	NA	Sidorova et al 2008	Jayme-Wise	Larix cajanderi Mayr	Holocene	Post-industrial	Deciduous	Gymnosperm	NE Russia	1880-2004 CE
NA	-26.2	-25	NA	NA	1.2	NA	Sidorova et al 2008	Jayme-Wise	Larix cajanderi Mayr	Holocene	Post-industrial	Deciduous	Gymnosperm	NE Russia	1880-2004 CE
NA	-26.4	-25	NA	NA	1.4	NA	Sidorova et al 2008	Jayme-Wise	Larix cajanderi Mayr	Holocene	Post-industrial	Deciduous	Gymnosperm	NE Russia	1880-2004 CE
NA	-26.2	-24.8	NA	NA	1.4	NA	Sidorova et al 2008	Jayme-Wise	Larix cajanderi Mayr	Holocene	Post-industrial	Deciduous	Gymnosperm	NE Russia	1880-2004 CE
NA	-26.1	-24.7	NA	NA	1.4	NA	Sidorova et al 2008	Jayme-Wise	Larix cajanderi Mayr	Holocene	Post-industrial	Deciduous	Gymnosperm	NE Russia	1880-2004 CE
NA	-26.3	-24.8	NA	NA	1.5	NA	Sidorova et al 2008	Jayme-Wise	Larix cajanderi Mayr	Holocene	Post-industrial	Deciduous	Gymnosperm	NE Russia	1880-2004 CE
NA	-26.3	-24.9	NA	NA	1.4	NA	Sidorova et al 2008	Jayme-Wise	Larix cajanderi Mayr	Holocene	Post-industrial	Deciduous	Gymnosperm	NE Russia	1880-2004 CE
NA	-26.3	-25	NA	NA	1.3	NA	Sidorova et al 2008	Jayme-Wise	Larix cajanderi Mayr	Holocene	Post-industrial	Deciduous	Gymnosperm	NE Russia	1880-2004 CE
NA	-25.6	-24	NA	NA	1.6	NA	Sidorova et al 2008	Jayme-Wise	Larix cajanderi Mayr	Holocene	Post-industrial	Deciduous	Gymnosperm	NE Russia	1880-2004 CE
NA	-25.3	-23.6	NA	NA	1.7	NA	Sidorova et al 2008	Jayme-Wise	Larix cajanderi Mayr	Holocene	Post-industrial	Deciduous	Gymnosperm	NE Russia	1880-2004 CE
NA	-25.5	-23.8	NA	NA	1.7	NA	Sidorova et al 2008	Jayme-Wise	Larix cajanderi Mayr	Holocene	Post-industrial	Deciduous	Gymnosperm	NE Russia	1880-2004 CE
NA	-25.2	-23.4	NA	NA	1.8	NA	Sidorova et al 2008	Jayme-Wise	Larix cajanderi Mayr	Holocene	Post-industrial	Deciduous	Gymnosperm	NE Russia	1880-2004 CE
NA	-24.9	-23.3	NA	NA	1.6	NA	Sidorova et al 2008	Jayme-Wise	Larix cajanderi Mayr	Holocene	Post-industrial	Deciduous	Gymnosperm	NE Russia	1880-2004 CE
NA	-24.8	-23.1	NA	NA	1.7	NA	Sidorova et al 2008	Jayme-Wise	Larix cajanderi Mayr	Holocene	Post-industrial	Deciduous	Gymnosperm	NE Russia	1880-2004 CE
NA	-25.1	-23.3	NA	NA	1.8	NA	Sidorova et al 2008	Jayme-Wise	Larix cajanderi Mayr	Holocene	Post-industrial	Deciduous	Gymnosperm	NE Russia	1880-2004 CE
NA	-25.4	-23.8	NA	NA	1.6	NA	Sidorova et al 2008	Jayme-Wise	Larix cajanderi Mayr	Holocene	Post-industrial	Deciduous	Gymnosperm	NE Russia	1880-2004 CE
NA	-25.5	-24.4	NA	NA	1.1	NA	Sidorova et al 2008	Jayme-Wise	Larix cajanderi Mayr	Holocene	Post-industrial	Deciduous	Gymnosperm	NE Russia	1880-2004 CE
NA	-25.3	-23.9	NA	NA	1.4	NA	Sidorova et al 2008	Jayme-Wise	Larix cajanderi Mayr	Holocene	Post-industrial	Deciduous	Gymnosperm	NE Russia	1880-2004 CE
NA	-25.3	-23.7	NA	NA	1.6	NA	Sidorova et al 2008	Jayme-Wise	Larix cajanderi Mayr	Holocene	Post-industrial	Deciduous	Gymnosperm	NE Russia	1880-2004 CE
NA	-26.2	-24.7	NA	NA	1.5	NA	Sidorova et al 2008	Jayme-Wise	Larix cajanderi Mayr	Holocene	Post-industrial	Deciduous	Gymnosperm	NE Russia	1880-2004 CE
NA	-26.1	-24.7	NA	NA	1.4	NA	Sidorova et al 2008	Jayme-Wise	Larix cajanderi Mayr	Holocene	Post-industrial	Deciduous	Gymnosperm	NE Russia	1880-2004 CE
NA	-25.5	-24	NA	NA	1.5	NA	Sidorova et al 2008	Jayme-Wise	Larix cajanderi Mayr	Holocene	Post-industrial	Deciduous	Gymnosperm	NE Russia	1880-2004 CE
NA	-25.9	-24	NA	NA	1.9	NA	Sidorova et al 2008	Jayme-Wise	Larix cajanderi Mayr	Holocene	Post-industrial	Deciduous	Gymnosperm	NE Russia	1880-2004 CE
NA	-26	-24.2	NA	NA	1.8	NA	Sidorova et al 2008	Jayme-Wise	Larix cajanderi Mayr	Holocene	Post-industrial	Deciduous	Gymnosperm	NE Russia	1880-2004 CE
NA	-26.1	-24.2	NA	NA	1.9	NA	Sidorova et al 2008	Jayme-Wise	Larix cajanderi Mayr	Holocene	Post-industrial	Deciduous	Gymnosperm	NE Russia	1880-2004 CE
NA	-26.3	-24.6	NA	NA	1.7	NA	Sidorova et al 2008	Jayme-Wise	Larix cajanderi Mayr	Holocene	Post-industrial	Deciduous	Gymnosperm	NE Russia	1880-2004 CE
NA	-26.4	-24.6	NA	NA	1.8	NA	Sidorova et al 2008	Jayme-Wise	Larix cajanderi Mayr	Holocene	Post-industrial	Deciduous	Gymnosperm	NE Russia	1880-2004 CE
NA	-26.9	-25.2	NA	NA	1.7	NA	Sidorova et al 2008	Jayme-Wise	Larix cajanderi Mayr	Holocene	Post-industrial	Deciduous	Gymnosperm	NE Russia	1880-2004 CE
NA	-26.4	-24.5	NA	NA	1.9	NA	Sidorova et al 2008	Jayme-Wise	Larix cajanderi Mayr	Holocene	Post-industrial	Deciduous	Gymnosperm	NE Russia	1880-2004 CE
NA	-25.9	-23.9	NA	NA	2	NA	Sidorova et al 2008	Jayme-Wise	Larix cajanderi Mayr	Holocene	Post-industrial	Deciduous	Gymnosperm	NE Russia	1880-2004 CE
NA	-26.1	-24.2	NA	NA	1.9	NA	Sidorova et al 2008	Jayme-Wise	Larix cajanderi Mayr	Holocene	Post-industrial	Deciduous	Gymnosperm	NE Russia	1880-2004 CE
NA	-26.4	-24.6	NA	NA	1.8	NA	Sidorova et al 2008	Jayme-Wise	Larix cajanderi Mayr	Holocene	Post-industrial	Deciduous	Gymnosperm	NE Russia	1880-2004 CE
NA	-25.9	-23.9	NA	NA	2	NA	Sidorova et al 2008	Jayme-Wise	Larix cajanderi Mayr	Holocene	Post-industrial	Deciduous	Gymnosperm	NE Russia	1880-2004 CE
NA	-25.5	-23.5	NA	NA	2	NA	Sidorova et al 2008	Jayme-Wise	Larix cajanderi Mayr	Holocene	Post-industrial	Deciduous	Gymnosperm	NE Russia	1880-2004 CE
NA	-25.6	-23.5	NA	NA	2.1	NA	Sidorova et al 2008	Jayme-Wise	Larix cajanderi Mayr	Holocene	Post-industrial	Deciduous	Gymnosperm	NE Russia	1880-2004 CE
NA	-25.5	-23.3	NA	NA	2.2	NA	Sidorova et al 2008	Jayme-Wise	Larix cajanderi Mayr	Holocene	Post-industrial	Deciduous	Gymnosperm	NE Russia	1880-2004 CE
NA	-26	-23.9	NA	NA	2.1	NA	Sidorova et al 2008	Jayme-Wise	Larix cajanderi Mayr	Holocene	Post-industrial	Deciduous	Gymnosperm	NE Russia	1880-2004 CE
NA	-24.9	-22.4	NA	NA	2.5	NA	Sidorova et al 2008	Jayme-Wise	Larix cajanderi Mayr	Holocene	Post-industrial	Deciduous	Gymnosperm	NE Russia	1880-2004 CE
NA	-25.9	-23.6	NA	NA	2.3	NA	Sidorova et al 2008	Jayme-Wise	Larix cajanderi Mayr	Holocene	Post-industrial	Deciduous	Gymnosperm	NE Russia	1880-2004 CE
NA	-26.2	-23.9	NA	NA	2.3	NA	Sidorova et al 2008	Jayme-Wise	Larix cajanderi Mayr	Holocene	Post-industrial	Deciduous	Gymnosperm	NE Russia	1880-2004 CE
NA	-26	-23.7	NA	NA	2.3	NA	Sidorova et al 2008	Jayme-Wise	Larix cajanderi Mayr	Holocene	Post-industrial	Deciduous	Gymnosperm	NE Russia	1880-2004 CE
NA	-26	-24.1	NA	NA	1.9	NA	Sidorova et al 2008	Jayme-Wise	Larix cajanderi Mayr	Holocene	Post-industrial	Deciduous	Gymnosperm	NE Russia	1880-2004 CE
NA	-25.2	-23.2	NA	NA	2	NA	Sidorova et al 2008	Jayme-Wise	Larix cajanderi Mayr	Holocene	Post-industrial	Deciduous	Gymnosperm	NE Russia	1880-2004 CE
NA	-25.7	-23.7	NA	NA	2	NA	Sidorova et al 2008	Jayme-Wise	Larix cajanderi Mayr	Holocene	Post-industrial	Deciduous	Gymnosperm	NE Russia	1880-2004 CE
NA	-25.9	-24.1	NA	NA	1.8	NA	Sidorova et al 2008	Jayme-Wise	Larix cajanderi Mayr	Holocene	Post-industrial	Deciduous	Gymnosperm	NE Russia	1880-2004 CE
NA	-25.6	-23.2	NA	NA	2.4	NA	Sidorova et al 2008	Jayme-Wise	Larix cajanderi Mayr	Holocene	Post-industrial	Deciduous	Gymnosperm	NE Russia	1880-2004 CE
NA	-25.6	-23.5	NA	NA	2.1	NA	Sidorova et al 2008	Jayme-Wise	Larix cajanderi Mayr	Holocene	Post-industrial	Deciduous	Gymnosperm	NE Russia	1880-2004 CE
NA	-25.8	-24	NA	NA	1.8	NA	Sidorova et al 2008	Jayme-Wise	Larix cajanderi Mayr	Holocene	Post-industrial	Deciduous	Gymnosperm	NE Russia	1880-2004 CE
NA	-25.1	-22.9	NA	NA	2.2	NA	Sidorova et al 2008	Jayme-Wise	Larix cajanderi Mayr	Holocene	Post-industrial	Deciduous	Gymnosperm	NE Russia	1880-2004 CE
NA	-25.4	-23.3	NA	NA	2.1	NA	Sidorova et al 2008	Jayme-Wise	Larix cajanderi Mayr	Holocene	Post-industrial	Deciduous	Gymnosperm	NE Russia	1880-2004 CE
NA	-25.4	-23.2	NA	NA	2.2	NA	Sidorova et al 2008	Jayme-Wise	Larix cajanderi Mayr	Holocene	Post-industrial	Deciduous	Gymnosperm	NE Russia	1880-2004 CE
NA	-25.5	-23.8	NA	NA	1.7	NA	Sidorova et al 2008	Jayme-Wise	Larix cajanderi Mayr	Holocene	Post-industrial	Deciduous	Gymnosperm	NE Russia	1880-2004 CE
NA	-26.2	-24	NA	NA	2.2	NA	Sidorova et al 2008	Jayme-Wise	Larix cajanderi Mayr	Holocene	Post-industrial	Deciduous	Gymnosperm	NE Russia	1880-2004 CE
NA	-26.6	-24.7	NA	NA	1.9	NA	Sidorova et al 2008	Jayme-Wise	Larix cajanderi Mayr	Holocene	Post-industrial	Deciduous	Gymnosperm	NE Russia	1880-2004 CE
NA	-26.4	-24.3	NA	NA	2.1	NA	Sidorova et al 2008	Jayme-Wise	Larix cajanderi Mayr	Holocene	Post-industrial	Deciduous	Gymnosperm	NE Russia	1880-2004 CE
NA	-26.5	-24.6	NA	NA	1.9	NA	Sidorova et al 2008	Jayme-Wise	Larix cajanderi Mayr	Holocene	Post-industrial	Deciduous	Gymnosperm	NE Russia	1880-2004 CE
NA	-26.5	-24.5	NA	NA	2	NA	Sidorova et al 2008	Jayme-Wise	Larix cajanderi Mayr	Holocene	Post-industrial	Deciduous	Gymnosperm	NE Russia	1880-2004 CE
NA	-26.2	-24.2	NA	NA	2	NA	Sidorova et al 2008	Jayme-Wise	Larix cajanderi Mayr	Holocene	Post-industrial	Deciduous	Gymnosperm	NE Russia	1880-2004 CE
NA	-25.8	-24	NA	NA	1.8	NA	Sidorova et al 2008	Jayme-Wise	Larix cajanderi Mayr	Holocene	Post-industrial	Deciduous	Gymnosperm	NE Russia	1880-2004 CE
NA	-25.6	-23.5	NA	NA	2.1	NA	Sidorova et al 2008	Jayme-Wise	Larix cajanderi Mayr	Holocene	Post-industrial	Deciduous	Gymnosperm	NE Russia	1880-2004 CE
NA	-25.3	-23.1	NA	NA	2.2	NA	Sidorova et al 2008	Jayme-Wise	Larix cajanderi Mayr	Holocene	Post-industrial	Deciduous	Gymnosperm	NE Russia	1880-2004 CE
NA	-26.3	-24.5	NA	NA	1.8	NA	Sidorova et al 2008	Jayme-Wise	Larix cajanderi Mayr	Holocene	Post-industrial	Deciduous	Gymnosperm	NE Russia	1880-2004 CE
NA	-25.7	-23.8	NA	NA	1.9	NA	Sidorova et al 2008	Jayme-Wise	Larix cajanderi Mayr	Holocene	Post-industrial	Deciduous	Gymnosperm	NE Russia	1880-2004 CE
NA	-26	-24.2	NA	NA	1.8	NA	Sidorova et al 2008	Jayme-Wise	Larix cajanderi Mayr	Holocene	Post-industrial	Deciduous	Gymnosperm	NE Russia	1880-2004 CE
NA	-25.1	-23.3	NA	NA	1.8	NA	Sidorova et al 2008	Jayme-Wise	Larix cajanderi Mayr	Holocene	Post-industrial	Deciduous	Gymnosperm	NE Russia	1880-2004 CE
NA	-26	-23.9	NA	NA	2.1	NA	Sidorova et al 2008	Jayme-Wise	Larix cajanderi Mayr	Holocene	Post-industrial	Deciduous	Gymnosperm	NE Russia	1880-2004 CE
NA	-26.3	-24.5	NA	NA	1.8	NA	Sidorova et al 2008	Jayme-Wise	Larix cajanderi Mayr	Holocene	Post-industrial	Deciduous	Gymnosperm	NE Russia	1880-2004 CE
NA	-26.5	-24.8	NA	NA	1.7	NA	Sidorova et al 2008	Jayme-Wise	Larix cajanderi Mayr	Holocene	Post-industrial	Deciduous	Gymnosperm	NE Russia	1880-2004 CE
NA	-24.9	-22.7	NA	NA	2.2	NA	Sidorova et al 2008	Jayme-Wise	Larix cajanderi Mayr	Holocene	Post-industrial	Deciduous	Gymnosperm	NE Russia	1880-2004 CE
NA	-25.9	-23.7	NA	NA	2.2	NA	Sidorova et al 2008	Jayme-Wise	Larix cajanderi Mayr	Holocene	Post-industrial	Deciduous	Gymnosperm	NE Russia	1880-2004 CE
NA	-25.9	-24.1	NA	NA	1.8	NA	Sidorova et al 2008	Jayme-Wise	Larix cajanderi Mayr	Holocene	Post-industrial	Deciduous	Gymnosperm	NE Russia	1880-2004 CE
NA	-25.8	-23.9	NA	NA	1.9	NA	Sidorova et al 2008	Jayme-Wise	Larix cajanderi Mayr	Holocene	Post-industrial	Deciduous	Gymnosperm	NE Russia	1880-2004 CE
NA	-26.5	-24.5	NA	NA	2	NA	Sidorova et al 2008	Jayme-Wise	Larix cajanderi Mayr	Holocene	Post-industrial	Deciduous	Gymnosperm	NE Russia	1880-2004 CE
NA	-26.3	-24.4	NA	NA	1.9	NA	Sidorova et al 2008	Jayme-Wise	Larix cajanderi Mayr	Holocene	Post-industrial	Deciduous	Gymnosperm	NE Russia	1880-2004 CE
NA	-26	-24	NA	NA	2	NA	Sidorova et al 2008	Jayme-Wise	Larix cajanderi Mayr	Holocene	Post-industrial	Deciduous	Gymnosperm	NE Russia	1880-2004 CE
NA	-26.7	-24.8	NA	NA	1.9	NA	Sidorova et al 2008	Jayme-Wise	Larix cajanderi Mayr	Holocene	Post-industrial	Deciduous	Gymnosperm	NE Russia	1880-2004 CE
NA	-26.5	-24.7	NA	NA	1.8	NA	Sidorova et al 2008	Jayme-Wise	Larix cajanderi Mayr	Holocene	Post-industrial	Deciduous	Gymnosperm	NE Russia	1880-2004 CE
NA	-26	-24	NA	NA	2	NA	Sidorova et al 2008	Jayme-Wise	Larix cajanderi Mayr	Holocene	Post-industrial	Deciduous	Gymnosperm	NE Russia	1880-2004 CE
NA	-24.9	-23	NA	NA	1.9	NA	Sidorova et al 2008	Jayme-Wise	Larix cajanderi Mayr	Holocene	Post-industrial	Deciduous	Gymnosperm	NE Russia	1880-2004 CE
NA	-25.6	-23.4	NA	NA	2.2	NA	Sidorova et al 2008	Jayme-Wise	Larix cajanderi Mayr	Holocene	Post-industrial	Deciduous	Gymnosperm	NE Russia	1880-2004 CE
NA	-24.9	-22.9	NA	NA	2	NA	Sidorova et al 2008	Jayme-Wise	Larix cajanderi Mayr	Holocene	Post-industrial	Deciduous	Gymnosperm	NE Russia	1880-2004 CE
NA	-25.3	-23.7	NA	NA	1.6	NA	Sidorova et al 2008	Jayme-Wise	Larix cajanderi Mayr	Holocene	Post-industrial	Deciduous	Gymnosperm	NE Russia	1880-2004 CE
NA	-25.8	-24.3	NA	NA	1.5	NA	Sidorova et al 2008	Jayme-Wise	Larix cajanderi Mayr	Holocene	Pre-industrial	Deciduous	Gymnosperm	NE Russia	900-1000 CE
NA	-25.4	-23.9	NA	NA	1.5	NA	Sidorova et al 2008	Jayme-Wise	Larix cajanderi Mayr	Holocene	Pre-industrial	Deciduous	Gymnosperm	NE Russia	900-1000 CE
NA	-25.2	-23.5	NA	NA	1.7	NA	Sidorova et al 2008	Jayme-Wise	Larix cajanderi Mayr	Holocene	Pre-industrial	Deciduous	Gymnosperm	NE Russia	900-1000 CE
NA	-25.4	-24.4	NA	NA	1	NA	Sidorova et al 2008	Jayme-Wise	Larix cajanderi Mayr	Holocene	Pre-industrial	Deciduous	Gymnosperm	NE Russia	900-1000 CE
NA	-25.6	-23.9	NA	NA	1.7	NA	Sidorova et al 2008	Jayme-Wise	Larix cajanderi Mayr	Holocene	Pre-industrial	Deciduous	Gymnosperm	NE Russia	900-1000 CE
NA	-25.4	-23.7	NA	NA	1.7	NA	Sidorova et al 2008	Jayme-Wise	Larix cajanderi Mayr	Holocene	Pre-industrial	Deciduous	Gymnosperm	NE Russia	900-1000 CE
NA	-25.4	-23.8	NA	NA	1.6	NA	Sidorova et al 2008	Jayme-Wise	Larix cajanderi Mayr	Holocene	Pre-industrial	Deciduous	Gymnosperm	NE Russia	900-1000 CE
NA	-25.5	-24	NA	NA	1.5	NA	Sidorova et al 2008	Jayme-Wise	Larix cajanderi Mayr	Holocene	Pre-industrial	Deciduous	Gymnosperm	NE Russia	900-1000 CE
NA	-26	-24.9	NA	NA	1.1	NA	Sidorova et al 2008	Jayme-Wise	Larix cajanderi Mayr	Holocene	Pre-industrial	Deciduous	Gymnosperm	NE Russia	900-1000 CE
NA	-25.9	-24.6	NA	NA	1.3	NA	Sidorova et al 2008	Jayme-Wise	Larix cajanderi Mayr	Holocene	Pre-industrial	Deciduous	Gymnosperm	NE Russia	900-1000 CE
NA	-25.6	-24.2	NA	NA	1.4	NA	Sidorova et al 2008	Jayme-Wise	Larix cajanderi Mayr	Holocene	Pre-industrial	Deciduous	Gymnosperm	NE Russia	900-1000 CE
NA	-25.4	-23.7	NA	NA	1.7	NA	Sidorova et al 2008	Jayme-Wise	Larix cajanderi Mayr	Holocene	Pre-industrial	Deciduous	Gymnosperm	NE Russia	900-1000 CE
NA	-25.9	-24.6	NA	NA	1.3	NA	Sidorova et al 2008	Jayme-Wise	Larix cajanderi Mayr	Holocene	Pre-industrial	Deciduous	Gymnosperm	NE Russia	900-1000 CE
NA	-25	-23.6	NA	NA	1.4	NA	Sidorova et al 2008	Jayme-Wise	Larix cajanderi Mayr	Holocene	Pre-industrial	Deciduous	Gymnosperm	NE Russia	900-1000 CE
NA	-25.6	-25.1	NA	NA	0.5	NA	Sidorova et al 2008	Jayme-Wise	Larix cajanderi Mayr	Holocene	Pre-industrial	Deciduous	Gymnosperm	NE Russia	900-1000 CE
NA	-25.2	-23.8	NA	NA	1.4	NA	Sidorova et al 2008	Jayme-Wise	Larix cajanderi Mayr	Holocene	Pre-industrial	Deciduous	Gymnosperm	NE Russia	900-1000 CE
NA	-25.8	-24.3	NA	NA	1.5	NA	Sidorova et al 2008	Jayme-Wise	Larix cajanderi Mayr	Holocene	Pre-industrial	Deciduous	Gymnosperm	NE Russia	900-1000 CE
NA	-26	-24.8	NA	NA	1.2	NA	Sidorova et al 2008	Jayme-Wise	Larix cajanderi Mayr	Holocene	Pre-industrial	Deciduous	Gymnosperm	NE Russia	900-1000 CE
NA	-26.1	-24.6	NA	NA	1.5	NA	Sidorova et al 2008	Jayme-Wise	Larix cajanderi Mayr	Holocene	Pre-industrial	Deciduous	Gymnosperm	NE Russia	900-1000 CE
NA	-25.5	-24.8	NA	NA	0.7	NA	Sidorova et al 2008	Jayme-Wise	Larix cajanderi Mayr	Holocene	Pre-industrial	Deciduous	Gymnosperm	NE Russia	900-1000 CE
NA	-26.1	-24.9	NA	NA	1.2	NA	Sidorova et al 2008	Jayme-Wise	Larix cajanderi Mayr	Holocene	Pre-industrial	Deciduous	Gymnosperm	NE Russia	900-1000 CE
NA	-26	-23.7	NA	NA	2.3	NA	Sidorova et al 2008	Jayme-Wise	Larix cajanderi Mayr	Holocene	Pre-industrial	Deciduous	Gymnosperm	NE Russia	900-1000 CE
NA	-25.9	-25.1	NA	NA	0.8	NA	Sidorova et al 2008	Jayme-Wise	Larix cajanderi Mayr	Holocene	Pre-industrial	Deciduous	Gymnosperm	NE Russia	900-1000 CE
NA	-26.4	-25.3	NA	NA	1.1	NA	Sidorova et al 2008	Jayme-Wise	Larix cajanderi Mayr	Holocene	Pre-industrial	Deciduous	Gymnosperm	NE Russia	900-1000 CE
NA	-26	-25.1	NA	NA	0.9	NA	Sidorova et al 2008	Jayme-Wise	Larix cajanderi Mayr	Holocene	Pre-industrial	Deciduous	Gymnosperm	NE Russia	900-1000 CE
NA	-25.7	-24.6	NA	NA	1.1	NA	Sidorova et al 2008	Jayme-Wise	Larix cajanderi Mayr	Holocene	Pre-industrial	Deciduous	Gymnosperm	NE Russia	900-1000 CE
NA	-26.2	-25.3	NA	NA	0.9	NA	Sidorova et al 2008	Jayme-Wise	Larix cajanderi Mayr	Holocene	Pre-industrial	Deciduous	Gymnosperm	NE Russia	900-1000 CE
NA	-25.9	-25	NA	NA	0.9	NA	Sidorova et al 2008	Jayme-Wise	Larix cajanderi Mayr	Holocene	Pre-industrial	Deciduous	Gymnosperm	NE Russia	900-1000 CE
NA	-25.9	-24.9	NA	NA	1	NA	Sidorova et al 2008	Jayme-Wise	Larix cajanderi Mayr	Holocene	Pre-industrial	Deciduous	Gymnosperm	NE Russia	900-1000 CE
NA	-25.3	-23.8	NA	NA	1.5	NA	Sidorova et al 2008	Jayme-Wise	Larix cajanderi Mayr	Holocene	Pre-industrial	Deciduous	Gymnosperm	NE Russia	900-1000 CE
NA	-26.3	-24.9	NA	NA	1.4	NA	Sidorova et al 2008	Jayme-Wise	Larix cajanderi Mayr	Holocene	Pre-industrial	Deciduous	Gymnosperm	NE Russia	900-1000 CE
NA	-26.2	-25	NA	NA	1.2	NA	Sidorova et al 2008	Jayme-Wise	Larix cajanderi Mayr	Holocene	Pre-industrial	Deciduous	Gymnosperm	NE Russia	900-1000 CE
NA	-25.4	-24.1	NA	NA	1.3	NA	Sidorova et al 2008	Jayme-Wise	Larix cajanderi Mayr	Holocene	Pre-industrial	Deciduous	Gymnosperm	NE Russia	900-1000 CE
NA	-25.7	-24.5	NA	NA	1.2	NA	Sidorova et al 2008	Jayme-Wise	Larix cajanderi Mayr	Holocene	Pre-industrial	Deciduous	Gymnosperm	NE Russia	900-1000 CE
NA	-25.9	-24.7	NA	NA	1.2	NA	Sidorova et al 2008	Jayme-Wise	Larix cajanderi Mayr	Holocene	Pre-industrial	Deciduous	Gymnosperm	NE Russia	900-1000 CE
NA	-26	-24.5	NA	NA	1.5	NA	Sidorova et al 2008	Jayme-Wise	Larix cajanderi Mayr	Holocene	Pre-industrial	Deciduous	Gymnosperm	NE Russia	900-1000 CE
NA	-26.3	-25	NA	NA	1.3	NA	Sidorova et al 2008	Jayme-Wise	Larix cajanderi Mayr	Holocene	Pre-industrial	Deciduous	Gymnosperm	NE Russia	900-1000 CE
NA	-26	-24.6	NA	NA	1.4	NA	Sidorova et al 2008	Jayme-Wise	Larix cajanderi Mayr	Holocene	Pre-industrial	Deciduous	Gymnosperm	NE Russia	900-1000 CE
NA	-26.2	-24.7	NA	NA	1.5	NA	Sidorova et al 2008	Jayme-Wise	Larix cajanderi Mayr	Holocene	Pre-industrial	Deciduous	Gymnosperm	NE Russia	900-1000 CE
NA	-25.5	-23.7	NA	NA	1.8	NA	Sidorova et al 2008	Jayme-Wise	Larix cajanderi Mayr	Holocene	Pre-industrial	Deciduous	Gymnosperm	NE Russia	900-1000 CE
NA	-25.9	-23.8	NA	NA	2.1	NA	Sidorova et al 2008	Jayme-Wise	Larix cajanderi Mayr	Holocene	Pre-industrial	Deciduous	Gymnosperm	NE Russia	900-1000 CE
NA	-25.8	-24.1	NA	NA	1.7	NA	Sidorova et al 2008	Jayme-Wise	Larix cajanderi Mayr	Holocene	Pre-industrial	Deciduous	Gymnosperm	NE Russia	900-1000 CE
NA	-25.1	-23.2	NA	NA	1.9	NA	Sidorova et al 2008	Jayme-Wise	Larix cajanderi Mayr	Holocene	Pre-industrial	Deciduous	Gymnosperm	NE Russia	900-1000 CE
NA	-25.8	-23.6	NA	NA	2.2	NA	Sidorova et al 2008	Jayme-Wise	Larix cajanderi Mayr	Holocene	Pre-industrial	Deciduous	Gymnosperm	NE Russia	900-1000 CE
NA	-25.6	-23.8	NA	NA	1.8	NA	Sidorova et al 2008	Jayme-Wise	Larix cajanderi Mayr	Holocene	Pre-industrial	Deciduous	Gymnosperm	NE Russia	900-1000 CE
NA	-25.6	-24	NA	NA	1.6	NA	Sidorova et al 2008	Jayme-Wise	Larix cajanderi Mayr	Holocene	Pre-industrial	Deciduous	Gymnosperm	NE Russia	900-1000 CE
NA	-25.4	-23.9	NA	NA	1.5	NA	Sidorova et al 2008	Jayme-Wise	Larix cajanderi Mayr	Holocene	Pre-industrial	Deciduous	Gymnosperm	NE Russia	900-1000 CE
NA	-25.5	-23.8	NA	NA	1.7	NA	Sidorova et al 2008	Jayme-Wise	Larix cajanderi Mayr	Holocene	Pre-industrial	Deciduous	Gymnosperm	NE Russia	900-1000 CE
NA	-25.3	-23.9	NA	NA	1.4	NA	Sidorova et al 2008	Jayme-Wise	Larix cajanderi Mayr	Holocene	Pre-industrial	Deciduous	Gymnosperm	NE Russia	900-1000 CE
NA	-25.8	-24.1	NA	NA	1.7	NA	Sidorova et al 2008	Jayme-Wise	Larix cajanderi Mayr	Holocene	Pre-industrial	Deciduous	Gymnosperm	NE Russia	900-1000 CE
NA	-25.7	-24.3	NA	NA	1.4	NA	Sidorova et al 2008	Jayme-Wise	Larix cajanderi Mayr	Holocene	Pre-industrial	Deciduous	Gymnosperm	NE Russia	900-1000 CE
NA	-25.8	-24.6	NA	NA	1.2	NA	Sidorova et al 2008	Jayme-Wise	Larix cajanderi Mayr	Holocene	Pre-industrial	Deciduous	Gymnosperm	NE Russia	900-1000 CE
NA	-26	-24.3	NA	NA	1.7	NA	Sidorova et al 2008	Jayme-Wise	Larix cajanderi Mayr	Holocene	Pre-industrial	Deciduous	Gymnosperm	NE Russia	900-1000 CE
NA	-26	-24.6	NA	NA	1.4	NA	Sidorova et al 2008	Jayme-Wise	Larix cajanderi Mayr	Holocene	Pre-industrial	Deciduous	Gymnosperm	NE Russia	900-1000 CE
NA	-26.1	-24.8	NA	NA	1.3	NA	Sidorova et al 2008	Jayme-Wise	Larix cajanderi Mayr	Holocene	Pre-industrial	Deciduous	Gymnosperm	NE Russia	900-1000 CE
NA	-24.8	-23.3	NA	NA	1.5	NA	Sidorova et al 2008	Jayme-Wise	Larix cajanderi Mayr	Holocene	Pre-industrial	Deciduous	Gymnosperm	NE Russia	900-1000 CE
NA	-25.1	-23.3	NA	NA	1.8	NA	Sidorova et al 2008	Jayme-Wise	Larix cajanderi Mayr	Holocene	Pre-industrial	Deciduous	Gymnosperm	NE Russia	900-1000 CE
NA	-25.4	-24.1	NA	NA	1.3	NA	Sidorova et al 2008	Jayme-Wise	Larix cajanderi Mayr	Holocene	Pre-industrial	Deciduous	Gymnosperm	NE Russia	900-1000 CE
NA	-25.6	-23.9	NA	NA	1.7	NA	Sidorova et al 2008	Jayme-Wise	Larix cajanderi Mayr	Holocene	Pre-industrial	Deciduous	Gymnosperm	NE Russia	900-1000 CE
NA	-25.7	-24.4	NA	NA	1.3	NA	Sidorova et al 2008	Jayme-Wise	Larix cajanderi Mayr	Holocene	Pre-industrial	Deciduous	Gymnosperm	NE Russia	900-1000 CE
NA	-25.7	-23.8	NA	NA	1.9	NA	Sidorova et al 2008	Jayme-Wise	Larix cajanderi Mayr	Holocene	Pre-industrial	Deciduous	Gymnosperm	NE Russia	900-1000 CE
NA	-25.6	-24	NA	NA	1.6	NA	Sidorova et al 2008	Jayme-Wise	Larix cajanderi Mayr	Holocene	Pre-industrial	Deciduous	Gymnosperm	NE Russia	900-1000 CE
NA	-25.7	-24.4	NA	NA	1.3	NA	Sidorova et al 2008	Jayme-Wise	Larix cajanderi Mayr	Holocene	Pre-industrial	Deciduous	Gymnosperm	NE Russia	900-1000 CE
NA	-26	-24.5	NA	NA	1.5	NA	Sidorova et al 2008	Jayme-Wise	Larix cajanderi Mayr	Holocene	Pre-industrial	Deciduous	Gymnosperm	NE Russia	900-1000 CE
NA	-25.9	-24.2	NA	NA	1.7	NA	Sidorova et al 2008	Jayme-Wise	Larix cajanderi Mayr	Holocene	Pre-industrial	Deciduous	Gymnosperm	NE Russia	900-1000 CE
NA	-25.7	-24.2	NA	NA	1.5	NA	Sidorova et al 2008	Jayme-Wise	Larix cajanderi Mayr	Holocene	Pre-industrial	Deciduous	Gymnosperm	NE Russia	900-1000 CE
NA	-26	-24.4	NA	NA	1.6	NA	Sidorova et al 2008	Jayme-Wise	Larix cajanderi Mayr	Holocene	Pre-industrial	Deciduous	Gymnosperm	NE Russia	900-1000 CE
NA	-26.2	-25.1	NA	NA	1.1	NA	Sidorova et al 2008	Jayme-Wise	Larix cajanderi Mayr	Holocene	Pre-industrial	Deciduous	Gymnosperm	NE Russia	900-1000 CE
NA	-26.1	-24.9	NA	NA	1.2	NA	Sidorova et al 2008	Jayme-Wise	Larix cajanderi Mayr	Holocene	Pre-industrial	Deciduous	Gymnosperm	NE Russia	900-1000 CE
NA	-25.6	-24.4	NA	NA	1.2	NA	Sidorova et al 2008	Jayme-Wise	Larix cajanderi Mayr	Holocene	Pre-industrial	Deciduous	Gymnosperm	NE Russia	900-1000 CE
NA	-25.6	-23.9	NA	NA	1.7	NA	Sidorova et al 2008	Jayme-Wise	Larix cajanderi Mayr	Holocene	Pre-industrial	Deciduous	Gymnosperm	NE Russia	900-1000 CE
NA	-25.5	-23.5	NA	NA	2	NA	Sidorova et al 2008	Jayme-Wise	Larix cajanderi Mayr	Holocene	Pre-industrial	Deciduous	Gymnosperm	NE Russia	900-1000 CE
NA	-26.3	-24.7	NA	NA	1.6	NA	Sidorova et al 2008	Jayme-Wise	Larix cajanderi Mayr	Holocene	Pre-industrial	Deciduous	Gymnosperm	NE Russia	900-1000 CE
NA	-26.5	-25.1	NA	NA	1.4	NA	Sidorova et al 2008	Jayme-Wise	Larix cajanderi Mayr	Holocene	Pre-industrial	Deciduous	Gymnosperm	NE Russia	900-1000 CE
NA	-26.3	-24.9	NA	NA	1.4	NA	Sidorova et al 2008	Jayme-Wise	Larix cajanderi Mayr	Holocene	Pre-industrial	Deciduous	Gymnosperm	NE Russia	900-1000 CE
NA	-26.2	-25	NA	NA	1.2	NA	Sidorova et al 2008	Jayme-Wise	Larix cajanderi Mayr	Holocene	Pre-industrial	Deciduous	Gymnosperm	NE Russia	900-1000 CE
NA	-26.4	-25	NA	NA	1.4	NA	Sidorova et al 2008	Jayme-Wise	Larix cajanderi Mayr	Holocene	Pre-industrial	Deciduous	Gymnosperm	NE Russia	900-1000 CE
NA	-26.3	-25.2	NA	NA	1.1	NA	Sidorova et al 2008	Jayme-Wise	Larix cajanderi Mayr	Holocene	Pre-industrial	Deciduous	Gymnosperm	NE Russia	900-1000 CE
NA	-26	-24.6	NA	NA	1.4	NA	Sidorova et al 2008	Jayme-Wise	Larix cajanderi Mayr	Holocene	Pre-industrial	Deciduous	Gymnosperm	NE Russia	900-1000 CE
NA	-25.6	-24.2	NA	NA	1.4	NA	Sidorova et al 2008	Jayme-Wise	Larix cajanderi Mayr	Holocene	Pre-industrial	Deciduous	Gymnosperm	NE Russia	900-1000 CE
NA	-25.7	-24.1	NA	NA	1.6	NA	Sidorova et al 2008	Jayme-Wise	Larix cajanderi Mayr	Holocene	Pre-industrial	Deciduous	Gymnosperm	NE Russia	900-1000 CE
NA	-25.7	-24.1	NA	NA	1.6	NA	Sidorova et al 2008	Jayme-Wise	Larix cajanderi Mayr	Holocene	Pre-industrial	Deciduous	Gymnosperm	NE Russia	900-1000 CE
NA	-25.6	-24.3	NA	NA	1.3	NA	Sidorova et al 2008	Jayme-Wise	Larix cajanderi Mayr	Holocene	Pre-industrial	Deciduous	Gymnosperm	NE Russia	900-1000 CE
NA	-26.3	-24.6	NA	NA	1.7	NA	Sidorova et al 2008	Jayme-Wise	Larix cajanderi Mayr	Holocene	Pre-industrial	Deciduous	Gymnosperm	NE Russia	900-1000 CE
NA	-26.4	-24.9	NA	NA	1.5	NA	Sidorova et al 2008	Jayme-Wise	Larix cajanderi Mayr	Holocene	Pre-industrial	Deciduous	Gymnosperm	NE Russia	900-1000 CE
NA	-26.2	-24.4	NA	NA	1.8	NA	Sidorova et al 2008	Jayme-Wise	Larix cajanderi Mayr	Holocene	Pre-industrial	Deciduous	Gymnosperm	NE Russia	900-1000 CE
NA	-26.2	-24.4	NA	NA	1.8	NA	Sidorova et al 2008	Jayme-Wise	Larix cajanderi Mayr	Holocene	Pre-industrial	Deciduous	Gymnosperm	NE Russia	900-1000 CE
NA	-26.2	-24.8	NA	NA	1.4	NA	Sidorova et al 2008	Jayme-Wise	Larix cajanderi Mayr	Holocene	Pre-industrial	Deciduous	Gymnosperm	NE Russia	900-1000 CE
NA	-26	-24.6	NA	NA	1.4	NA	Sidorova et al 2008	Jayme-Wise	Larix cajanderi Mayr	Holocene	Pre-industrial	Deciduous	Gymnosperm	NE Russia	900-1000 CE
NA	-25.6	-24	NA	NA	1.6	NA	Sidorova et al 2008	Jayme-Wise	Larix cajanderi Mayr	Holocene	Pre-industrial	Deciduous	Gymnosperm	NE Russia	900-1000 CE
NA	-25.7	-24.4	NA	NA	1.3	NA	Sidorova et al 2008	Jayme-Wise	Larix cajanderi Mayr	Holocene	Pre-industrial	Deciduous	Gymnosperm	NE Russia	900-1000 CE
NA	-25.9	-24.3	NA	NA	1.6	NA	Sidorova et al 2008	Jayme-Wise	Larix cajanderi Mayr	Holocene	Pre-industrial	Deciduous	Gymnosperm	NE Russia	900-1000 CE
NA	-25.4	-23.6	NA	NA	1.8	NA	Sidorova et al 2008	Jayme-Wise	Larix cajanderi Mayr	Holocene	Pre-industrial	Deciduous	Gymnosperm	NE Russia	900-1000 CE
NA	-25.7	-23.7	NA	NA	2	NA	Sidorova et al 2008	Jayme-Wise	Larix cajanderi Mayr	Holocene	Pre-industrial	Deciduous	Gymnosperm	NE Russia	900-1000 CE
NA	-25.3	-23.1	NA	NA	2.2	NA	Sidorova et al 2008	Jayme-Wise	Larix cajanderi Mayr	Holocene	Pre-industrial	Deciduous	Gymnosperm	NE Russia	900-1000 CE
NA	-26	-24.3	NA	NA	1.7	NA	Sidorova et al 2008	Jayme-Wise	Larix cajanderi Mayr	Holocene	Pre-industrial	Deciduous	Gymnosperm	NE Russia	900-1000 CE
NA	-25.8	-24.3	NA	NA	1.5	NA	Sidorova et al 2008	Jayme-Wise	Larix cajanderi Mayr	Holocene	Pre-industrial	Deciduous	Gymnosperm	NE Russia	900-1000 CE
NA	-26	-24.6	NA	NA	1.4	NA	Sidorova et al 2008	Jayme-Wise	Larix cajanderi Mayr	Holocene	Pre-industrial	Deciduous	Gymnosperm	NE Russia	900-1000 CE
NA	-26.1	-25.1	NA	NA	1	NA	Sidorova et al 2008	Jayme-Wise	Larix cajanderi Mayr	Holocene	Pre-industrial	Deciduous	Gymnosperm	NE Russia	900-1000 CE
NA	-26.1	-24.7	NA	NA	1.4	NA	Sidorova et al 2008	Jayme-Wise	Larix cajanderi Mayr	Holocene	Pre-industrial	Deciduous	Gymnosperm	NE Russia	900-1000 CE
NA	-28.1	-26.3	NA	NA	1.8	NA	Tei et al 2013	Jayme-Wise	Larix cajanderi	Holocene	Post-industrial	Deciduous	Gymnosperm	East Siberia	1940-2007 CE
NA	-27.7	-26.4	NA	NA	1.3	NA	Tei et al 2013	Jayme-Wise	Larix cajanderi	Holocene	Post-industrial	Deciduous	Gymnosperm	East Siberia	1940-2007 CE
NA	-27.3	-26.3	NA	NA	1	NA	Tei et al 2013	Jayme-Wise	Larix cajanderi	Holocene	Post-industrial	Deciduous	Gymnosperm	East Siberia	1940-2007 CE
NA	-27.3	-26	NA	NA	1.3	NA	Tei et al 2013	Jayme-Wise	Larix cajanderi	Holocene	Post-industrial	Deciduous	Gymnosperm	East Siberia	1940-2007 CE
NA	-27.3	-25.8	NA	NA	1.5	NA	Tei et al 2013	Jayme-Wise	Larix cajanderi	Holocene	Post-industrial	Deciduous	Gymnosperm	East Siberia	1940-2007 CE
NA	-27	-25.8	NA	NA	1.2	NA	Tei et al 2013	Jayme-Wise	Larix cajanderi	Holocene	Post-industrial	Deciduous	Gymnosperm	East Siberia	1940-2007 CE
NA	-27.2	-25.1	NA	NA	2.1	NA	Tei et al 2013	Jayme-Wise	Larix cajanderi	Holocene	Post-industrial	Deciduous	Gymnosperm	East Siberia	1940-2007 CE
NA	-26.9	-25.4	NA	NA	1.5	NA	Tei et al 2013	Jayme-Wise	Larix cajanderi	Holocene	Post-industrial	Deciduous	Gymnosperm	East Siberia	1940-2007 CE
NA	-26.8	-25.6	NA	NA	1.2	NA	Tei et al 2013	Jayme-Wise	Larix cajanderi	Holocene	Post-industrial	Deciduous	Gymnosperm	East Siberia	1940-2007 CE
NA	-26.6	-25.2	NA	NA	1.4	NA	Tei et al 2013	Jayme-Wise	Larix cajanderi	Holocene	Post-industrial	Deciduous	Gymnosperm	East Siberia	1940-2007 CE
NA	-26.4	-24.9	NA	NA	1.5	NA	Tei et al 2013	Jayme-Wise	Larix cajanderi	Holocene	Post-industrial	Deciduous	Gymnosperm	East Siberia	1940-2007 CE
NA	-26.4	-25	NA	NA	1.4	NA	Tei et al 2013	Jayme-Wise	Larix cajanderi	Holocene	Post-industrial	Deciduous	Gymnosperm	East Siberia	1940-2007 CE
NA	-26.1	-24.9	NA	NA	1.2	NA	Tei et al 2013	Jayme-Wise	Larix cajanderi	Holocene	Post-industrial	Deciduous	Gymnosperm	East Siberia	1940-2007 CE
NA	-26	-24.9	NA	NA	1.1	NA	Tei et al 2013	Jayme-Wise	Larix cajanderi	Holocene	Post-industrial	Deciduous	Gymnosperm	East Siberia	1940-2007 CE
NA	-26	-24.6	NA	NA	1.4	NA	Tei et al 2013	Jayme-Wise	Larix cajanderi	Holocene	Post-industrial	Deciduous	Gymnosperm	East Siberia	1940-2007 CE
NA	-25.8	-24.3	NA	NA	1.5	NA	Tei et al 2013	Jayme-Wise	Larix cajanderi	Holocene	Post-industrial	Deciduous	Gymnosperm	East Siberia	1940-2007 CE
NA	-25.7	-24.7	NA	NA	1	NA	Tei et al 2013	Jayme-Wise	Larix cajanderi	Holocene	Post-industrial	Deciduous	Gymnosperm	East Siberia	1940-2007 CE
NA	-25.8	-24	NA	NA	1.8	NA	Tei et al 2013	Jayme-Wise	Larix cajanderi	Holocene	Post-industrial	Deciduous	Gymnosperm	East Siberia	1940-2007 CE
NA	-25.7	-24.2	NA	NA	1.5	NA	Tei et al 2013	Jayme-Wise	Larix cajanderi	Holocene	Post-industrial	Deciduous	Gymnosperm	East Siberia	1940-2007 CE
NA	-25.6	-24.5	NA	NA	1.1	NA	Tei et al 2013	Jayme-Wise	Larix cajanderi	Holocene	Post-industrial	Deciduous	Gymnosperm	East Siberia	1940-2007 CE
NA	-25.3	-24.7	NA	NA	0.6	NA	Tei et al 2013	Jayme-Wise	Larix cajanderi	Holocene	Post-industrial	Deciduous	Gymnosperm	East Siberia	1940-2007 CE
NA	-25.3	-25.2	NA	NA	0.1	NA	Tei et al 2013	Jayme-Wise	Larix cajanderi	Holocene	Post-industrial	Deciduous	Gymnosperm	East Siberia	1940-2007 CE
NA	-25.3	-24.4	NA	NA	0.9	NA	Tei et al 2013	Jayme-Wise	Larix cajanderi	Holocene	Post-industrial	Deciduous	Gymnosperm	East Siberia	1940-2007 CE
NA	-25.4	-24.2	NA	NA	1.2	NA	Tei et al 2013	Jayme-Wise	Larix cajanderi	Holocene	Post-industrial	Deciduous	Gymnosperm	East Siberia	1940-2007 CE
NA	-24.9	-24.3	NA	NA	0.6	NA	Tei et al 2013	Jayme-Wise	Larix cajanderi	Holocene	Post-industrial	Deciduous	Gymnosperm	East Siberia	1940-2007 CE
NA	-25.6	-24	NA	NA	1.6	NA	Tei et al 2013	Jayme-Wise	Larix cajanderi	Holocene	Post-industrial	Deciduous	Gymnosperm	East Siberia	1940-2007 CE
NA	-25.5	-23.9	NA	NA	1.6	NA	Tei et al 2013	Jayme-Wise	Larix cajanderi	Holocene	Post-industrial	Deciduous	Gymnosperm	East Siberia	1940-2007 CE
NA	-25.2	-24	NA	NA	1.2	NA	Tei et al 2013	Jayme-Wise	Larix cajanderi	Holocene	Post-industrial	Deciduous	Gymnosperm	East Siberia	1940-2007 CE
NA	-22.8	-21.1	NA	NA	1.7	NA	Tei et al 2013	Jayme-Wise	Larix cajanderi	Holocene	Post-industrial	Deciduous	Gymnosperm	East Siberia	1940-2007 CE
NA	-23.1	-21.2	NA	NA	1.9	NA	Tei et al 2013	Jayme-Wise	Larix cajanderi	Holocene	Post-industrial	Deciduous	Gymnosperm	East Siberia	1940-2007 CE
NA	-23.4	-21.7	NA	NA	1.7	NA	Tei et al 2013	Jayme-Wise	Larix cajanderi	Holocene	Post-industrial	Deciduous	Gymnosperm	East Siberia	1940-2007 CE
NA	-23.3	-21.7	NA	NA	1.6	NA	Tei et al 2013	Jayme-Wise	Larix cajanderi	Holocene	Post-industrial	Deciduous	Gymnosperm	East Siberia	1940-2007 CE
NA	-23.2	-21.8	NA	NA	1.4	NA	Tei et al 2013	Jayme-Wise	Larix cajanderi	Holocene	Post-industrial	Deciduous	Gymnosperm	East Siberia	1940-2007 CE
NA	-23.2	-21.6	NA	NA	1.6	NA	Tei et al 2013	Jayme-Wise	Larix cajanderi	Holocene	Post-industrial	Deciduous	Gymnosperm	East Siberia	1940-2007 CE
NA	-23	-21.6	NA	NA	1.4	NA	Tei et al 2013	Jayme-Wise	Larix cajanderi	Holocene	Post-industrial	Deciduous	Gymnosperm	East Siberia	1940-2007 CE
NA	-23.1	-21.8	NA	NA	1.3	NA	Tei et al 2013	Jayme-Wise	Larix cajanderi	Holocene	Post-industrial	Deciduous	Gymnosperm	East Siberia	1940-2007 CE
NA	-23.2	-21.8	NA	NA	1.4	NA	Tei et al 2013	Jayme-Wise	Larix cajanderi	Holocene	Post-industrial	Deciduous	Gymnosperm	East Siberia	1940-2007 CE
NA	-23.6	-21.7	NA	NA	1.9	NA	Tei et al 2013	Jayme-Wise	Larix cajanderi	Holocene	Post-industrial	Deciduous	Gymnosperm	East Siberia	1940-2007 CE
NA	-23.7	-21.9	NA	NA	1.8	NA	Tei et al 2013	Jayme-Wise	Larix cajanderi	Holocene	Post-industrial	Deciduous	Gymnosperm	East Siberia	1940-2007 CE
NA	-24.3	-21.8	NA	NA	2.5	NA	Tei et al 2013	Jayme-Wise	Larix cajanderi	Holocene	Post-industrial	Deciduous	Gymnosperm	East Siberia	1940-2007 CE
NA	-24.1	-21.8	NA	NA	2.3	NA	Tei et al 2013	Jayme-Wise	Larix cajanderi	Holocene	Post-industrial	Deciduous	Gymnosperm	East Siberia	1940-2007 CE
NA	-23.9	-21.9	NA	NA	2	NA	Tei et al 2013	Jayme-Wise	Larix cajanderi	Holocene	Post-industrial	Deciduous	Gymnosperm	East Siberia	1940-2007 CE
NA	-24.4	-22.4	NA	NA	2	NA	Tei et al 2013	Jayme-Wise	Larix cajanderi	Holocene	Post-industrial	Deciduous	Gymnosperm	East Siberia	1940-2007 CE
NA	-23.8	-23.2	NA	NA	0.6	NA	Tei et al 2013	Jayme-Wise	Larix cajanderi	Holocene	Post-industrial	Deciduous	Gymnosperm	East Siberia	1940-2007 CE
NA	-23.7	-22.8	NA	NA	0.9	NA	Tei et al 2013	Jayme-Wise	Larix cajanderi	Holocene	Post-industrial	Deciduous	Gymnosperm	East Siberia	1940-2007 CE
NA	-23.6	-22.6	NA	NA	1	NA	Tei et al 2013	Jayme-Wise	Larix cajanderi	Holocene	Post-industrial	Deciduous	Gymnosperm	East Siberia	1940-2007 CE
NA	-23.7	-22.1	NA	NA	1.6	NA	Tei et al 2013	Jayme-Wise	Larix cajanderi	Holocene	Post-industrial	Deciduous	Gymnosperm	East Siberia	1940-2007 CE
NA	-23.7	-22.1	NA	NA	1.6	NA	Tei et al 2013	Jayme-Wise	Larix cajanderi	Holocene	Post-industrial	Deciduous	Gymnosperm	East Siberia	1940-2007 CE
NA	-23.9	-22.3	NA	NA	1.6	NA	Tei et al 2013	Jayme-Wise	Larix cajanderi	Holocene	Post-industrial	Deciduous	Gymnosperm	East Siberia	1940-2007 CE
NA	-24.1	-22.4	NA	NA	1.7	NA	Tei et al 2013	Jayme-Wise	Larix cajanderi	Holocene	Post-industrial	Deciduous	Gymnosperm	East Siberia	1940-2007 CE
NA	-24.2	-22.5	NA	NA	1.7	NA	Tei et al 2013	Jayme-Wise	Larix cajanderi	Holocene	Post-industrial	Deciduous	Gymnosperm	East Siberia	1940-2007 CE
NA	-24.1	-22.6	NA	NA	1.5	NA	Tei et al 2013	Jayme-Wise	Larix cajanderi	Holocene	Post-industrial	Deciduous	Gymnosperm	East Siberia	1940-2007 CE
NA	-24	-22.5	NA	NA	1.5	NA	Tei et al 2013	Jayme-Wise	Larix cajanderi	Holocene	Post-industrial	Deciduous	Gymnosperm	East Siberia	1940-2007 CE
NA	-24	-22.6	NA	NA	1.4	NA	Tei et al 2013	Jayme-Wise	Larix cajanderi	Holocene	Post-industrial	Deciduous	Gymnosperm	East Siberia	1940-2007 CE
NA	-24.2	-22.9	NA	NA	1.3	NA	Tei et al 2013	Jayme-Wise	Larix cajanderi	Holocene	Post-industrial	Deciduous	Gymnosperm	East Siberia	1940-2007 CE
NA	-24.3	-23.1	NA	NA	1.2	NA	Tei et al 2013	Jayme-Wise	Larix cajanderi	Holocene	Post-industrial	Deciduous	Gymnosperm	East Siberia	1940-2007 CE
NA	-24.5	-23.3	NA	NA	1.2	NA	Tei et al 2013	Jayme-Wise	Larix cajanderi	Holocene	Post-industrial	Deciduous	Gymnosperm	East Siberia	1940-2007 CE
NA	-24.9	-22.9	NA	NA	2	NA	Tei et al 2013	Jayme-Wise	Larix cajanderi	Holocene	Post-industrial	Deciduous	Gymnosperm	East Siberia	1940-2007 CE
NA	-24.9	-23.2	NA	NA	1.7	NA	Tei et al 2013	Jayme-Wise	Larix cajanderi	Holocene	Post-industrial	Deciduous	Gymnosperm	East Siberia	1940-2007 CE
NA	-24.9	-23.4	NA	NA	1.5	NA	Tei et al 2013	Jayme-Wise	Larix cajanderi	Holocene	Post-industrial	Deciduous	Gymnosperm	East Siberia	1940-2007 CE
NA	-25	-23.6	NA	NA	1.4	NA	Tei et al 2013	Jayme-Wise	Larix cajanderi	Holocene	Post-industrial	Deciduous	Gymnosperm	East Siberia	1940-2007 CE
NA	-24.8	-23.5	NA	NA	1.3	NA	Tei et al 2013	Jayme-Wise	Larix cajanderi	Holocene	Post-industrial	Deciduous	Gymnosperm	East Siberia	1940-2007 CE
NA	-24.8	-23.7	NA	NA	1.1	NA	Tei et al 2013	Jayme-Wise	Larix cajanderi	Holocene	Post-industrial	Deciduous	Gymnosperm	East Siberia	1940-2007 CE
NA	-24.7	-23.3	NA	NA	1.4	NA	Tei et al 2013	Jayme-Wise	Larix cajanderi	Holocene	Post-industrial	Deciduous	Gymnosperm	East Siberia	1940-2007 CE
NA	-24.7	-23	NA	NA	1.7	NA	Tei et al 2013	Jayme-Wise	Larix cajanderi	Holocene	Post-industrial	Deciduous	Gymnosperm	East Siberia	1940-2007 CE
NA	-25.4	-23.5	NA	NA	1.9	NA	Tei et al 2013	Jayme-Wise	Larix cajanderi	Holocene	Post-industrial	Deciduous	Gymnosperm	East Siberia	1940-2007 CE
NA	-25.4	-23.6	NA	NA	1.8	NA	Tei et al 2013	Jayme-Wise	Larix cajanderi	Holocene	Post-industrial	Deciduous	Gymnosperm	East Siberia	1940-2007 CE
NA	-25.2	-23.4	NA	NA	1.8	NA	Tei et al 2013	Jayme-Wise	Larix cajanderi	Holocene	Post-industrial	Deciduous	Gymnosperm	East Siberia	1940-2007 CE
NA	-25.2	-23.5	NA	NA	1.7	NA	Tei et al 2013	Jayme-Wise	Larix cajanderi	Holocene	Post-industrial	Deciduous	Gymnosperm	East Siberia	1940-2007 CE
NA	-25.1	-23.7	NA	NA	1.4	NA	Tei et al 2013	Jayme-Wise	Larix cajanderi	Holocene	Post-industrial	Deciduous	Gymnosperm	East Siberia	1940-2007 CE
NA	-25.4	-23.7	NA	NA	1.7	NA	Tei et al 2013	Jayme-Wise	Larix cajanderi	Holocene	Post-industrial	Deciduous	Gymnosperm	East Siberia	1940-2007 CE
NA	-24.6	-22.9	NA	NA	1.7	NA	Tei et al 2013	Jayme-Wise	Larix cajanderi	Holocene	Post-industrial	Deciduous	Gymnosperm	East Siberia	1940-2007 CE
NA	-24.4	-22.7	NA	NA	1.7	NA	Tei et al 2013	Jayme-Wise	Larix cajanderi	Holocene	Post-industrial	Deciduous	Gymnosperm	East Siberia	1940-2007 CE
NA	-28	-26.9	NA	NA	1.1	NA	Verheyden et al 2005	Jayme-Wise	Rhizophora mucronata	Holocene	Post-industrial	Evergreen	Angiosperm	Kenya	1990-1999 CE
NA	-26.9	-26	NA	NA	0.9	NA	Verheyden et al 2005	Jayme-Wise	Rhizophora mucronata	Holocene	Post-industrial	Evergreen	Angiosperm	Kenya	1990-1999 CE
NA	-26.8	-26	NA	NA	0.8	NA	Verheyden et al 2005	Jayme-Wise	Rhizophora mucronata	Holocene	Post-industrial	Evergreen	Angiosperm	Kenya	1990-1999 CE
NA	-26.6	-25.6	NA	NA	1	NA	Verheyden et al 2005	Jayme-Wise	Rhizophora mucronata	Holocene	Post-industrial	Evergreen	Angiosperm	Kenya	1990-1999 CE
NA	-26.9	-26.3	NA	NA	0.6	NA	Verheyden et al 2005	Jayme-Wise	Rhizophora mucronata	Holocene	Post-industrial	Evergreen	Angiosperm	Kenya	1990-1999 CE
NA	-27.2	-26.2	NA	NA	1	NA	Verheyden et al 2005	Jayme-Wise	Rhizophora mucronata	Holocene	Post-industrial	Evergreen	Angiosperm	Kenya	1990-1999 CE
NA	-26.8	-25.8	NA	NA	1	NA	Verheyden et al 2005	Jayme-Wise	Rhizophora mucronata	Holocene	Post-industrial	Evergreen	Angiosperm	Kenya	1990-1999 CE
NA	-25.4	-24.6	NA	NA	0.8	NA	Verheyden et al 2005	Jayme-Wise	Rhizophora mucronata	Holocene	Post-industrial	Evergreen	Angiosperm	Kenya	1990-1999 CE
NA	-27	-26.1	NA	NA	0.9	NA	Verheyden et al 2005	Jayme-Wise	Rhizophora mucronata	Holocene	Post-industrial	Evergreen	Angiosperm	Kenya	1990-1999 CE
NA	-27	-26	NA	NA	1	NA	Verheyden et al 2005	Jayme-Wise	Rhizophora mucronata	Holocene	Post-industrial	Evergreen	Angiosperm	Kenya	1990-1999 CE
NA	-26.7	-25.8	NA	NA	0.9	NA	Verheyden et al 2005	Jayme-Wise	Rhizophora mucronata	Holocene	Post-industrial	Evergreen	Angiosperm	Kenya	1990-1999 CE
NA	-25.9	-25	NA	NA	0.9	NA	Verheyden et al 2005	Jayme-Wise	Rhizophora mucronata	Holocene	Post-industrial	Evergreen	Angiosperm	Kenya	1990-1999 CE
NA	-26	-24.8	NA	NA	1.2	NA	Verheyden et al 2005	Jayme-Wise	Rhizophora mucronata	Holocene	Post-industrial	Evergreen	Angiosperm	Kenya	1990-1999 CE
NA	-25.8	-24.6	NA	NA	1.2	NA	Verheyden et al 2005	Jayme-Wise	Rhizophora mucronata	Holocene	Post-industrial	Evergreen	Angiosperm	Kenya	1990-1999 CE
NA	-25.5	-24.5	NA	NA	1	NA	Verheyden et al 2005	Jayme-Wise	Rhizophora mucronata	Holocene	Post-industrial	Evergreen	Angiosperm	Kenya	1990-1999 CE
NA	-25.6	-24.3	NA	NA	1.3	NA	Verheyden et al 2005	Jayme-Wise	Rhizophora mucronata	Holocene	Post-industrial	Evergreen	Angiosperm	Kenya	1990-1999 CE
NA	-25.2	-24.1	NA	NA	1.1	NA	Verheyden et al 2005	Jayme-Wise	Rhizophora mucronata	Holocene	Post-industrial	Evergreen	Angiosperm	Kenya	1990-1999 CE
NA	-26.6	-25.9	NA	NA	0.7	NA	Verheyden et al 2005	Jayme-Wise	Rhizophora mucronata	Holocene	Post-industrial	Evergreen	Angiosperm	Kenya	1990-1999 CE
NA	-26.2	-25.4	NA	NA	0.8	NA	Verheyden et al 2005	Jayme-Wise	Rhizophora mucronata	Holocene	Post-industrial	Evergreen	Angiosperm	Kenya	1990-1999 CE
NA	-25.9	-25.1	NA	NA	0.8	NA	Verheyden et al 2005	Jayme-Wise	Rhizophora mucronata	Holocene	Post-industrial	Evergreen	Angiosperm	Kenya	1990-1999 CE
NA	-25.9	-24.9	NA	NA	1	NA	Verheyden et al 2005	Jayme-Wise	Rhizophora mucronata	Holocene	Post-industrial	Evergreen	Angiosperm	Kenya	1990-1999 CE
NA	-25.6	-24.8	NA	NA	0.8	NA	Verheyden et al 2005	Jayme-Wise	Rhizophora mucronata	Holocene	Post-industrial	Evergreen	Angiosperm	Kenya	1990-1999 CE
NA	-25.6	-24.6	NA	NA	1	NA	Verheyden et al 2005	Jayme-Wise	Rhizophora mucronata	Holocene	Post-industrial	Evergreen	Angiosperm	Kenya	1990-1999 CE
NA	-25.4	-24.5	NA	NA	0.9	NA	Verheyden et al 2005	Jayme-Wise	Rhizophora mucronata	Holocene	Post-industrial	Evergreen	Angiosperm	Kenya	1990-1999 CE
NA	-25.3	-24.3	NA	NA	1	NA	Verheyden et al 2005	Jayme-Wise	Rhizophora mucronata	Holocene	Post-industrial	Evergreen	Angiosperm	Kenya	1990-1999 CE
NA	-25.5	-24.3	NA	NA	1.2	NA	Verheyden et al 2005	Jayme-Wise	Rhizophora mucronata	Holocene	Post-industrial	Evergreen	Angiosperm	Kenya	1990-1999 CE
NA	-27.1	-26.3	NA	NA	0.8	NA	Wieser et al 2016	Brendel	Pinus cembra	Holocene	Post-industrial	Evergreen	Gymnosperm	NA	1979-2016 CE
NA	-27.1	-25.8	NA	NA	1.3	NA	Wieser et al 2016	Brendel	Pinus cembra	Holocene	Post-industrial	Evergreen	Gymnosperm	NA	1979-2016 CE
NA	-27	-25.6	NA	NA	1.4	NA	Wieser et al 2016	Brendel	Pinus cembra	Holocene	Post-industrial	Evergreen	Gymnosperm	NA	1979-2016 CE
NA	-26.4	-25.4	NA	NA	1	NA	Wieser et al 2016	Brendel	Pinus cembra	Holocene	Post-industrial	Evergreen	Gymnosperm	NA	1979-2016 CE
NA	-26.2	-25.1	NA	NA	1.1	NA	Wieser et al 2016	Brendel	Pinus cembra	Holocene	Post-industrial	Evergreen	Gymnosperm	NA	1979-2016 CE
NA	-26	-25	NA	NA	1	NA	Wieser et al 2016	Brendel	Pinus cembra	Holocene	Post-industrial	Evergreen	Gymnosperm	NA	1979-2016 CE
NA	-25.6	-24.8	NA	NA	0.8	NA	Wieser et al 2016	Brendel	Pinus cembra	Holocene	Post-industrial	Evergreen	Gymnosperm	NA	1979-2016 CE
NA	-25.6	-24.6	NA	NA	1	NA	Wieser et al 2016	Brendel	Pinus cembra	Holocene	Post-industrial	Evergreen	Gymnosperm	NA	1979-2016 CE
NA	-25.6	-24.5	NA	NA	1.1	NA	Wieser et al 2016	Brendel	Pinus cembra	Holocene	Post-industrial	Evergreen	Gymnosperm	NA	1979-2016 CE
NA	-25.3	-24.4	NA	NA	0.9	NA	Wieser et al 2016	Brendel	Pinus cembra	Holocene	Post-industrial	Evergreen	Gymnosperm	NA	1979-2016 CE
NA	-24.9	-23.7	NA	NA	1.2	NA	Wieser et al 2016	Brendel	Pinus cembra	Holocene	Post-industrial	Evergreen	Gymnosperm	NA	1979-2016 CE
NA	-24.4	-23.1	NA	NA	1.3	NA	Wieser et al 2016	Brendel	Pinus cembra	Holocene	Post-industrial	Evergreen	Gymnosperm	NA	1979-2016 CE
NA	-27.4	-26.3	NA	NA	1.1	NA	Wieser et al 2016	Brendel	Larix decidua	Holocene	Post-industrial	Deciduous	Gymnosperm	NA	1979-2016 CE
NA	-26.8	-25.9	NA	NA	0.9	NA	Wieser et al 2016	Brendel	Larix decidua	Holocene	Post-industrial	Deciduous	Gymnosperm	NA	1979-2016 CE
NA	-26.4	-25.7	NA	NA	0.7	NA	Wieser et al 2016	Brendel	Larix decidua	Holocene	Post-industrial	Deciduous	Gymnosperm	NA	1979-2016 CE
NA	-26.3	-25.4	NA	NA	0.9	NA	Wieser et al 2016	Brendel	Larix decidua	Holocene	Post-industrial	Deciduous	Gymnosperm	NA	1979-2016 CE
NA	-26.1	-25.5	NA	NA	0.6	NA	Wieser et al 2016	Brendel	Larix decidua	Holocene	Post-industrial	Deciduous	Gymnosperm	NA	1979-2016 CE
NA	-26.3	-24.7	NA	NA	1.6	NA	Wieser et al 2016	Brendel	Larix decidua	Holocene	Post-industrial	Deciduous	Gymnosperm	NA	1979-2016 CE
NA	-26	-24.8	NA	NA	1.2	NA	Wieser et al 2016	Brendel	Larix decidua	Holocene	Post-industrial	Deciduous	Gymnosperm	NA	1979-2016 CE
NA	-25.6	-24.4	NA	NA	1.2	NA	Wieser et al 2016	Brendel	Larix decidua	Holocene	Post-industrial	Deciduous	Gymnosperm	NA	1979-2016 CE
NA	-25.3	-24	NA	NA	1.3	NA	Wieser et al 2016	Brendel	Larix decidua	Holocene	Post-industrial	Deciduous	Gymnosperm	NA	1979-2016 CE
NA	-30.603	-28.762					Schleser et al 2015	MSISS	Cariniana micrantha	Holocene	Post-industrial	NA	Angiosperm	Brazil	NA
NA	-29.68	-28.099					Schleser et al 2015	MSISS	Cariniana micrantha	Holocene	Post-industrial	NA	Angiosperm	Brazil	NA
NA	-29.639	-28.094					Schleser et al 2015	MSISS	Cariniana micrantha	Holocene	Post-industrial	NA	Angiosperm	Brazil	NA
NA	-29	-28.139					Schleser et al 2015	MSISS	Cariniana micrantha	Holocene	Post-industrial	NA	Angiosperm	Brazil	NA
NA	-29.302	-27.796					Schleser et al 2015	MSISS	Cariniana micrantha	Holocene	Post-industrial	NA	Angiosperm	Brazil	NA
NA	-29.478	-27.694					Schleser et al 2015	MSISS	Cariniana micrantha	Holocene	Post-industrial	NA	Angiosperm	Brazil	NA
NA	-29.399	-27.615					Schleser et al 2015	MSISS	Cariniana micrantha	Holocene	Post-industrial	NA	Angiosperm	Brazil	NA
NA	-29.36	-27.639					Schleser et al 2015	MSISS	Cariniana micrantha	Holocene	Post-industrial	NA	Angiosperm	Brazil	NA
NA	-29.182	-27.441					Schleser et al 2015	MSISS	Cariniana micrantha	Holocene	Post-industrial	NA	Angiosperm	Brazil	NA
NA	-28.91	-27.471					Schleser et al 2015	MSISS	Cariniana micrantha	Holocene	Post-industrial	NA	Angiosperm	Brazil	NA
NA	-28.732	-27.294					Schleser et al 2015	MSISS	Cariniana micrantha	Holocene	Post-industrial	NA	Angiosperm	Brazil	NA
NA	-28.97	-27.072					Schleser et al 2015	MSISS	Cariniana micrantha	Holocene	Post-industrial	NA	Angiosperm	Brazil	NA
NA	-28.699	-27.152					Schleser et al 2015	MSISS	Cariniana micrantha	Holocene	Post-industrial	NA	Angiosperm	Brazil	NA
NA	-28.689	-27.154					Schleser et al 2015	MSISS	Cariniana micrantha	Holocene	Post-industrial	NA	Angiosperm	Brazil	NA
NA	-28.579	-27.183					Schleser et al 2015	MSISS	Cariniana micrantha	Holocene	Post-industrial	NA	Angiosperm	Brazil	NA
NA	-28.443	-27.111					Schleser et al 2015	MSISS	Cariniana micrantha	Holocene	Post-industrial	NA	Angiosperm	Brazil	NA
NA	-28.52	-27.073					Schleser et al 2015	MSISS	Cariniana micrantha	Holocene	Post-industrial	NA	Angiosperm	Brazil	NA
NA	-28.58	-26.991					Schleser et al 2015	MSISS	Cariniana micrantha	Holocene	Post-industrial	NA	Angiosperm	Brazil	NA
NA	-28.659	-26.971					Schleser et al 2015	MSISS	Cariniana micrantha	Holocene	Post-industrial	NA	Angiosperm	Brazil	NA
NA	-28.768	-26.95					Schleser et al 2015	MSISS	Cariniana micrantha	Holocene	Post-industrial	NA	Angiosperm	Brazil	NA
NA	-28.53	-26.921					Schleser et al 2015	MSISS	Cariniana micrantha	Holocene	Post-industrial	NA	Angiosperm	Brazil	NA
NA	-28.571	-26.873					Schleser et al 2015	MSISS	Cariniana micrantha	Holocene	Post-industrial	NA	Angiosperm	Brazil	NA
NA	-28.631	-26.891					Schleser et al 2015	MSISS	Cariniana micrantha	Holocene	Post-industrial	NA	Angiosperm	Brazil	NA
NA	-28.597	-26.823					Schleser et al 2015	MSISS	Cariniana micrantha	Holocene	Post-industrial	NA	Angiosperm	Brazil	NA
NA	-28.5	-26.753					Schleser et al 2015	MSISS	Cariniana micrantha	Holocene	Post-industrial	NA	Angiosperm	Brazil	NA
NA	-28.423	-26.785					Schleser et al 2015	MSISS	Cariniana micrantha	Holocene	Post-industrial	NA	Angiosperm	Brazil	NA
NA	-28.382	-26.695					Schleser et al 2015	MSISS	Cariniana micrantha	Holocene	Post-industrial	NA	Angiosperm	Brazil	NA
NA	-28.451	-26.652					Schleser et al 2015	MSISS	Cariniana micrantha	Holocene	Post-industrial	NA	Angiosperm	Brazil	NA
NA	-28.45	-26.51					Schleser et al 2015	MSISS	Cariniana micrantha	Holocene	Post-industrial	NA	Angiosperm	Brazil	NA
NA	-28.511	-26.509					Schleser et al 2015	MSISS	Cariniana micrantha	Holocene	Post-industrial	NA	Angiosperm	Brazil	NA
NA	-28.302	-26.976					Schleser et al 2015	MSISS	Cariniana micrantha	Holocene	Post-industrial	NA	Angiosperm	Brazil	NA
NA	-27.908	-26.853					Schleser et al 2015	MSISS	Cariniana micrantha	Holocene	Post-industrial	NA	Angiosperm	Brazil	NA
NA	-27.989	-26.652					Schleser et al 2015	MSISS	Cariniana micrantha	Holocene	Post-industrial	NA	Angiosperm	Brazil	NA
NA	-27.958	-26.592					Schleser et al 2015	MSISS	Cariniana micrantha	Holocene	Post-industrial	NA	Angiosperm	Brazil	NA
NA	-28.01	-26.483					Schleser et al 2015	MSISS	Cariniana micrantha	Holocene	Post-industrial	NA	Angiosperm	Brazil	NA
NA	-27.942	-26.463					Schleser et al 2015	MSISS	Cariniana micrantha	Holocene	Post-industrial	NA	Angiosperm	Brazil	NA
NA	-27.897	-26.382					Schleser et al 2015	MSISS	Cariniana micrantha	Holocene	Post-industrial	NA	Angiosperm	Brazil	NA
NA	-27.856	-26.314					Schleser et al 2015	MSISS	Cariniana micrantha	Holocene	Post-industrial	NA	Angiosperm	Brazil	NA
NA	-28.199	-26.506					Schleser et al 2015	MSISS	Cariniana micrantha	Holocene	Post-industrial	NA	Angiosperm	Brazil	NA
NA	-28.32	-26.272					Schleser et al 2015	MSISS	Cariniana micrantha	Holocene	Post-industrial	NA	Angiosperm	Brazil	NA
NA	-28.191	-26.289					Schleser et al 2015	MSISS	Cariniana micrantha	Holocene	Post-industrial	NA	Angiosperm	Brazil	NA
NA	-28.158	-26.315					Schleser et al 2015	MSISS	Cariniana micrantha	Holocene	Post-industrial	NA	Angiosperm	Brazil	NA
NA	-28.061	-26.22					Schleser et al 2015	MSISS	Cariniana micrantha	Holocene	Post-industrial	NA	Angiosperm	Brazil	NA
NA	-27.99	-26.202					Schleser et al 2015	MSISS	Cariniana micrantha	Holocene	Post-industrial	NA	Angiosperm	Brazil	NA
NA	-27.761	-26.273					Schleser et al 2015	MSISS	Cariniana micrantha	Holocene	Post-industrial	NA	Angiosperm	Brazil	NA
NA	-27.709	-26.157					Schleser et al 2015	MSISS	Cariniana micrantha	Holocene	Post-industrial	NA	Angiosperm	Brazil	NA
NA	-27.72	-26.04					Schleser et al 2015	MSISS	Cariniana micrantha	Holocene	Post-industrial	NA	Angiosperm	Brazil	NA
NA	-28.182	-26.002					Schleser et al 2015	MSISS	Cariniana micrantha	Holocene	Post-industrial	NA	Angiosperm	Brazil	NA
NA	-27.889	-26.024					Schleser et al 2015	MSISS	Cariniana micrantha	Holocene	Post-industrial	NA	Angiosperm	Brazil	NA
NA	-27.431	-26.131					Schleser et al 2015	MSISS	Cariniana micrantha	Holocene	Post-industrial	NA	Angiosperm	Brazil	NA
NA	-27.848	-25.84					Schleser et al 2015	MSISS	Cariniana micrantha	Holocene	Post-industrial	NA	Angiosperm	Brazil	NA
NA	-28.098	-26.658					Schleser et al 2015	MSISS	Cariniana micrantha	Holocene	Post-industrial	NA	Angiosperm	Brazil	NA
NA	-28.131	-26.853					Schleser et al 2015	MSISS	Cariniana micrantha	Holocene	Post-industrial	NA	Angiosperm	Brazil	NA
NA	-27.908	-27.761					Schleser et al 2015	MSISS	Cariniana micrantha	Holocene	Post-industrial	NA	Angiosperm	Brazil	NA
NA	-28.02	-26.927					Schleser et al 2015	MSISS	Cariniana micrantha	Holocene	Post-industrial	NA	Angiosperm	Brazil	NA
NA	-27.181	-26.929					Schleser et al 2015	MSISS	Cariniana micrantha	Holocene	Post-industrial	NA	Angiosperm	Brazil	NA
NA	-28.627	-26.888					Schleser et al 2015	MSISS	Cariniana micrantha	Holocene	Post-industrial	NA	Angiosperm	Brazil	NA
NA	-28.262	-26.525					Schleser et al 2015	MSISS	Cariniana micrantha	Holocene	Post-industrial	NA	Angiosperm	Brazil	NA
NA	-28.229	-26.484					Schleser et al 2015	MSISS	Cariniana micrantha	Holocene	Post-industrial	NA	Angiosperm	Brazil	NA
NA	-28.219	-26.47					Schleser et al 2015	MSISS	Cariniana micrantha	Holocene	Post-industrial	NA	Angiosperm	Brazil	NA
NA	-28.57	-26.39					Schleser et al 2015	MSISS	Cariniana micrantha	Holocene	Post-industrial	NA	Angiosperm	Brazil	NA
NA	-28.498	-26.459					Schleser et al 2015	MSISS	Cariniana micrantha	Holocene	Post-industrial	NA	Angiosperm	Brazil	NA
NA	-28.42	-26.429					Schleser et al 2015	MSISS	Cariniana micrantha	Holocene	Post-industrial	NA	Angiosperm	Brazil	NA
NA	-28.411	-26.371					Schleser et al 2015	MSISS	Cariniana micrantha	Holocene	Post-industrial	NA	Angiosperm	Brazil	NA
NA	-28.37	-26.368					Schleser et al 2015	MSISS	Cariniana micrantha	Holocene	Post-industrial	NA	Angiosperm	Brazil	NA
NA	-28.478	-26.28					Schleser et al 2015	MSISS	Cariniana micrantha	Holocene	Post-industrial	NA	Angiosperm	Brazil	NA
NA	-28.261	-26.303					Schleser et al 2015	MSISS	Cariniana micrantha	Holocene	Post-industrial	NA	Angiosperm	Brazil	NA
NA	-28.319	-26.169					Schleser et al 2015	MSISS	Cariniana micrantha	Holocene	Post-industrial	NA	Angiosperm	Brazil	NA
NA	-27.908	-26.471					Schleser et al 2015	MSISS	Cariniana micrantha	Holocene	Post-industrial	NA	Angiosperm	Brazil	NA
NA	-27.928	-26.378					Schleser et al 2015	MSISS	Cariniana micrantha	Holocene	Post-industrial	NA	Angiosperm	Brazil	NA
NA	-27.94	-26.337					Schleser et al 2015	MSISS	Cariniana micrantha	Holocene	Post-industrial	NA	Angiosperm	Brazil	NA
NA	-27.879	-26.299					Schleser et al 2015	MSISS	Cariniana micrantha	Holocene	Post-industrial	NA	Angiosperm	Brazil	NA
NA	-27.85	-26.264					Schleser et al 2015	MSISS	Cariniana micrantha	Holocene	Post-industrial	NA	Angiosperm	Brazil	NA
NA	-27.799	-26.196					Schleser et al 2015	MSISS	Cariniana micrantha	Holocene	Post-industrial	NA	Angiosperm	Brazil	NA
NA	-27.8	-26.178					Schleser et al 2015	MSISS	Cariniana micrantha	Holocene	Post-industrial	NA	Angiosperm	Brazil	NA
NA	-27.788	-26.195					Schleser et al 2015	MSISS	Cariniana micrantha	Holocene	Post-industrial	NA	Angiosperm	Brazil	NA
NA	-27.65	-26.281					Schleser et al 2015	MSISS	Cariniana micrantha	Holocene	Post-industrial	NA	Angiosperm	Brazil	NA
NA	-27.588	-26.234					Schleser et al 2015	MSISS	Cariniana micrantha	Holocene	Post-industrial	NA	Angiosperm	Brazil	NA
NA	-28.059	-26.257					Schleser et al 2015	MSISS	Cariniana micrantha	Holocene	Post-industrial	NA	Angiosperm	Brazil	NA
NA	-28.058	-26.178					Schleser et al 2015	MSISS	Cariniana micrantha	Holocene	Post-industrial	NA	Angiosperm	Brazil	NA
NA	-28.108	-26.108					Schleser et al 2015	MSISS	Cariniana micrantha	Holocene	Post-industrial	NA	Angiosperm	Brazil	NA
NA	-28.207	-26.069					Schleser et al 2015	MSISS	Cariniana micrantha	Holocene	Post-industrial	NA	Angiosperm	Brazil	NA
NA	-28.071	-26.028					Schleser et al 2015	MSISS	Cariniana micrantha	Holocene	Post-industrial	NA	Angiosperm	Brazil	NA
NA	-27.85	-26.059					Schleser et al 2015	MSISS	Cariniana micrantha	Holocene	Post-industrial	NA	Angiosperm	Brazil	NA
NA	-27.737	-26.04					Schleser et al 2015	MSISS	Cariniana micrantha	Holocene	Post-industrial	NA	Angiosperm	Brazil	NA
NA	-27.738	-25.927					Schleser et al 2015	MSISS	Cariniana micrantha	Holocene	Post-industrial	NA	Angiosperm	Brazil	NA
NA	-27.729	-25.89					Schleser et al 2015	MSISS	Cariniana micrantha	Holocene	Post-industrial	NA	Angiosperm	Brazil	NA
NA	-27.708	-25.894					Schleser et al 2015	MSISS	Cariniana micrantha	Holocene	Post-industrial	NA	Angiosperm	Brazil	NA
NA	-27.621	-25.938					Schleser et al 2015	MSISS	Cariniana micrantha	Holocene	Post-industrial	NA	Angiosperm	Brazil	NA
NA	-28.021	-25.866					Schleser et al 2015	MSISS	Cariniana micrantha	Holocene	Post-industrial	NA	Angiosperm	Brazil	NA
NA	-28.058	-25.778					Schleser et al 2015	MSISS	Cariniana micrantha	Holocene	Post-industrial	NA	Angiosperm	Brazil	NA
NA	-24.5	-22.4	NA	NA	2.1	35.8	Bechtel et al., 2003	Jayme-Wise	Unknown	Pliocene	Deep-time	Unknown	Gymnosperm	Slovenia	2.58-5.333 Ma
NA	-24.9	-22.8	NA	NA	2.1	51.7	Bechtel et al., 2003	Jayme-Wise	Unknown	Pliocene	Deep-time	Unknown	Gymnosperm	Slovenia	2.58-5.333 Ma
NA	-23.8	-21.5	NA	NA	2.3	25.6	Bechtel et al., 2003	Jayme-Wise	Unknown	Pliocene	Deep-time	Unknown	Gymnosperm	Slovenia	2.58-5.333 Ma
NA	-25.9	-22.3	NA	NA	3.6	20	Bechtel et al., 2003	Jayme-Wise	Unknown	Pliocene	Deep-time	Unknown	Gymnosperm	Slovenia	2.58-5.333 Ma
NA	-24	-22.6	NA	NA	1.4	23.1	Bechtel et al., 2003	Jayme-Wise	Unknown	Pliocene	Deep-time	Unknown	Gymnosperm	Slovenia	2.58-5.333 Ma
NA	-22.8	-20.6	NA	NA	2.2	20.8	Bechtel et al., 2003	Jayme-Wise	Unknown	Pliocene	Deep-time	Unknown	Gymnosperm	Slovenia	2.58-5.333 Ma
NA	-24.9	-21.7	NA	NA	3.2	13.7	Bechtel et al., 2003	Jayme-Wise	Unknown	Pliocene	Deep-time	Unknown	Gymnosperm	Slovenia	2.58-5.333 Ma
NA	-25.6	-22.6	NA	NA	3	10.6	Bechtel et al., 2003	Jayme-Wise	Unknown	Pliocene	Deep-time	Unknown	Gymnosperm	Slovenia	2.58-5.333 Ma
NA	-22.8	-19.5	NA	NA	3.3	34.4	Bechtel et al., 2007	Jayme-Wise	Unknown	Middle Miocene	Deep-time	Unknown	Gymnosperm	Poland	Middle Miocene
NA	-25.7	-22.6	NA	NA	3.1	7.1	Bechtel et al., 2007	Jayme-Wise	Unknown	Middle Miocene	Deep-time	Unknown	Gymnosperm	Poland	Middle Miocene
NA	-25.7	-21.1	NA	NA	4.6	4.5	Bechtel et al., 2007	Jayme-Wise	Unknown	Middle Miocene	Deep-time	Unknown	Gymnosperm	Poland	Middle Miocene
NA	-24.2	-21	NA	NA	3.2	12.8	Bechtel et al., 2007	Jayme-Wise	Unknown	Middle Miocene	Deep-time	Unknown	Gymnosperm	Poland	Middle Miocene
NA	-24.5	-20.8	NA	NA	3.7	4.8	Bechtel et al., 2007	Jayme-Wise	Unknown	Middle Miocene	Deep-time	Unknown	Gymnosperm	Poland	Middle Miocene
NA	-23.1	-19.6	NA	NA	3.5	31.1	Bechtel et al., 2007	Jayme-Wise	Unknown	Middle Miocene	Deep-time	Unknown	Gymnosperm	Poland	Middle Miocene
NA	-25.3	-21.4	NA	NA	3.9	25.3	Bechtel et al., 2007	Jayme-Wise	Unknown	Middle Miocene	Deep-time	Unknown	Gymnosperm	Poland	Middle Miocene
NA	-24.3	-20.6	NA	NA	3.7	11.8	Bechtel et al., 2002	Jayme-Wise	Unknown	Early Miocene	Deep-time	Unknown	Gymnosperm	Austria	Early Miocene
NA	-24.5	-20.6	NA	NA	3.9	16.5	Bechtel et al., 2002	Jayme-Wise	Unknown	Early Miocene	Deep-time	Unknown	Gymnosperm	Austria	Early Miocene
NA	-23.8	-20.4	NA	NA	3.4	5.9	Bechtel et al., 2002	Jayme-Wise	Unknown	Early Miocene	Deep-time	Unknown	Gymnosperm	Austria	Early Miocene
NA	-23.7	-20	NA	NA	3.7	2.8	Bechtel et al., 2002	Jayme-Wise	Unknown	Early Miocene	Deep-time	Unknown	Gymnosperm	Austria	Early Miocene
NA	-24	-23.9	NA	NA	0.1	5.6	Bechtel et al., 2002	Jayme-Wise	Unknown	Early Miocene	Deep-time	Unknown	Gymnosperm	Austria	Early Miocene
NA	-23.4	-20.9	NA	NA	2.5	1.4	Bechtel et al., 2002	Jayme-Wise	Unknown	Early Miocene	Deep-time	Unknown	Gymnosperm	Austria	Early Miocene
NA	-25.6	-23.1	NA	NA	2.5	12.4	Bechtel et al., 2003b	Jayme-Wise	Unknown	Late Miocene	Deep-time	Unknown	Angiosperm	Austria	Pannonian
NA	-25.8	-23	NA	NA	2.8	11.5	Bechtel et al., 2003b	Jayme-Wise	Unknown	Late Miocene	Deep-time	Unknown	Angiosperm	Austria	Pannonian
NA	-22.7	-19.4	NA	NA	3.3	20.3	Bechtel et al., 2003b	Jayme-Wise	Unknown	Late Miocene	Deep-time	Unknown	Gymnosperm	Austria	Pannonian
NA	-24.4	-21	NA	NA	3.4	8.3	Bechtel et al., 2003b	Jayme-Wise	Unknown	Late Miocene	Deep-time	Unknown	Gymnosperm	Austria	Pannonian
NA	-26.6	-24.1	NA	NA	2.5	10.9	Bechtel et al., 2003b	Jayme-Wise	Unknown	Late Miocene	Deep-time	Unknown	Angiosperm	Austria	Pannonian
NA	-25.1	-21.6	NA	NA	3.5	13.9	Bechtel et al., 2003b	Jayme-Wise	Unknown	Late Miocene	Deep-time	Unknown	Gymnosperm	Austria	Pannonian
NA	-24.7	-21.9	NA	NA	2.8	0.6	Bechtel et al., 2003b	Jayme-Wise	Unknown	Late Miocene	Deep-time	Unknown	Gymnosperm	Austria	Pannonian
NA	-24	-21.1	NA	NA	2.9	2.8	Bechtel et al., 2003b	Jayme-Wise	Unknown	Late Miocene	Deep-time	Unknown	Gymnosperm	Austria	Pannonian
NA	-26.6	-23.5	NA	NA	3.1	4.3	Bechtel et al., 2007b	Jayme-Wise	Unknown	Late Miocene	Deep-time	Unknown	Angiosperm	Austria	Pannonian
NA	-24.2	-20.8	NA	NA	3.4	5.4	Bechtel et al., 2007b	Jayme-Wise	Unknown	Late Miocene	Deep-time	Unknown	Gymnosperm	Austria	Pannonian
NA	-24.9	-21.1	NA	NA	3.8	3.5	Bechtel et al., 2007b	Jayme-Wise	Unknown	Late Miocene	Deep-time	Unknown	Gymnosperm	Austria	Pannonian
NA	-24.1	-20.8	NA	NA	3.3	1.1	Bechtel et al., 2007b	Jayme-Wise	Unknown	Late Miocene	Deep-time	Unknown	Gymnosperm	Austria	Pannonian
NA	-22.5	-18.5	NA	NA	4	3.3	Bechtel et al., 2007b	Jayme-Wise	Unknown	Late Miocene	Deep-time	Unknown	Gymnosperm	Austria	Pannonian
NA	-25.5	-22.2	NA	NA	3.3	4.2	Bechtel et al., 2007b	Jayme-Wise	Unknown	Late Miocene	Deep-time	Unknown	Angiosperm	Austria	Pannonian
NF01	-23.6	-20.4	0.1	NA	3.2	2.7	This study	Brendel	Unknown	Miocene	Deep-time	Unknown	Unknown	Yunnan, China	Miocene
EE-01	-22.6	-19.8	0	0.4	2.8	0.4	This study	Brendel	Unknown	Eocene	Deep-time	Unknown	Gymnosperm	Banks Island, Canada	53-54.5 Ma
ER-04	-24.1	-20.8	0.17	NA	3.3	NA	This study	Brendel	Unknown	Eocene	Deep-time	Unknown	Gymnosperm	Banks Island, Canada	53-54.5 Ma
ER-05_01	-23.2	-21.4	0.07	1.77	1.8	NA	This study	Brendel	Unknown	Eocene	Deep-time	Unknown	Gymnosperm	Banks Island, Canada	53-54.5 Ma
ER-05_02	-23.2	-20.1	0.07	0.12	3.1	NA	This study	Brendel	Unknown	Eocene	Deep-time	Unknown	Gymnosperm	Banks Island, Canada	53-54.5 Ma
ER-05_03	-23.2	-20	0.07	0.15	3.2	NA	This study	Brendel	Unknown	Eocene	Deep-time	Unknown	Gymnosperm	Banks Island, Canada	53-54.5 Ma
ER-05_04	-23.2	-20.3	0.1	0	2.9	0.8	This study	Brendel	Unknown	Eocene	Deep-time	Unknown	Gymnosperm	Banks Island, Canada	53-54.5 Ma
IC-01_01	-22.9	-20.1	0.04	0.18	2.8	NA	This study	Brendel	Unknown	Eocene	Deep-time	Unknown	Gymnosperm	Banks Island, Canada	53-54.5 Ma
IC-01_02	-22.9	-20	0.04	0.17	2.9	NA	This study	Brendel	Unknown	Eocene	Deep-time	Unknown	Gymnosperm	Banks Island, Canada	53-54.5 Ma
IC-01_03	-22.9	-19.8	0	0	3.1	1.5	This study	Brendel	Unknown	Eocene	Deep-time	Unknown	Gymnosperm	Banks Island, Canada	53-54.5 Ma
IC-01_04	-22.9	-20	0	0.1	2.9	2.1	This study	Brendel	Unknown	Eocene	Deep-time	Unknown	Gymnosperm	Banks Island, Canada	53-54.5 Ma
IC-02	-24.6	-21.9	0.3	NA	2.7	0.6	This study	Brendel	Unknown	Eocene	Deep-time	Unknown	Gymnosperm	Banks Island, Canada	53-54.5 Ma
IC-03A	-24.3	-22.4	0.2	0.1	1.9	2.2	This study	Brendel	Unknown	Eocene	Deep-time	Unknown	Gymnosperm	Banks Island, Canada	53-54.5 Ma
IC-04	-23.3	-21.1	0.27	NA	2.2	NA	This study	Brendel	Unknown	Eocene	Deep-time	Unknown	Gymnosperm	Banks Island, Canada	53-54.5 Ma
IC-04A	-24.2	-21.9	0.2	0	2.3	0	This study	Brendel	Unknown	Eocene	Deep-time	Unknown	Gymnosperm	Banks Island, Canada	53-54.5 Ma
NNW073	-27.7	-25.4	0.2	NA	2.3	12.2	This study	Brendel	Unknown	Oligocene	Deep-time	Unknown	Unknown	Nanning, China	Oligocene
NNW019	-28.5	-25.4	0.1	0	3.1	2.98	This study	Brendel	Unknown	Oligocene	Deep-time	Unknown	Unknown	Nanning, China	Oligocene
NNW033	-29.6	-27.8	0	1.1	1.8	3.94	This study	Brendel	Unknown	Oligocene	Deep-time	Unknown	Unknown	Nanning, China	Oligocene
NNW037	-29.3	-28.3	0.4	0.1	1	38.51	This study	Brendel	Unknown	Oligocene	Deep-time	Unknown	Unknown	Nanning, China	Oligocene
NNW010	-29.1	-26.9	0	0	2.2	4.02	This study	Brendel	Unknown	Oligocene	Deep-time	Unknown	Unknown	Nanning, China	Oligocene
NNW008	-29.3	-26.6	NA	0	2.7	6.6	This study	Brendel	Unknown	Oligocene	Deep-time	Unknown	Unknown	Nanning, China	Oligocene
NNW060	-29.8	-26.5	0	0.1	3.3	2.87	This study	Brendel	Unknown	Oligocene	Deep-time	Unknown	Unknown	Nanning, China	Oligocene
NNW012	-29.2	-27.4	0.1	0.1	1.8	31.4	This study	Brendel	Unknown	Oligocene	Deep-time	Unknown	Unknown	Nanning, China	Oligocene
NNW029	-27.7	-25.3	0	0	2.4	1.63	This study	Brendel	Unknown	Oligocene	Deep-time	Unknown	Unknown	Nanning, China	Oligocene
NNW024	-31.8	-30.2	0	0	1.6	4.73	This study	Brendel	Unknown	Oligocene	Deep-time	Unknown	Unknown	Nanning, China	Oligocene
NNW018	-29.5	-27.3	0.2	0.1	2.2	3.65	This study	Brendel	Unknown	Oligocene	Deep-time	Unknown	Unknown	Nanning, China	Oligocene
NNW068	-28.3	-25.5	0	0	2.8	4.15	This study	Brendel	Unknown	Oligocene	Deep-time	Unknown	Unknown	Nanning, China	Oligocene
NNW065	-30.2	-27.9	0.1	0.1	2.3	2.3	This study	Brendel	Unknown	Oligocene	Deep-time	Unknown	Unknown	Nanning, China	Oligocene
NNW040	-28.9	-25.6	0	0	3.3	1.74	This study	Brendel	Unknown	Oligocene	Deep-time	Unknown	Unknown	Nanning, China	Oligocene
NNW073	-27.1	-25.7	0.1	0	1.4	12.76	This study	Brendel	Unknown	Oligocene	Deep-time	Unknown	Unknown	Nanning, China	Oligocene
NNW069	-27.5	-26.2	0.1	0	1.3	44.49	This study	Brendel	Unknown	Oligocene	Deep-time	Unknown	Unknown	Nanning, China	Oligocene
NNW101	-29.6	-26.6	0.1	0.1	3	3.42	This study	Brendel	Unknown	Oligocene	Deep-time	Unknown	Unknown	Nanning, China	Oligocene
NNW101A	-29.6	-26.5	0	0	3.1	4.23	This study	Brendel	Unknown	Oligocene	Deep-time	Unknown	Unknown	Nanning, China	Oligocene
NNW035	-29.4	-27.5	0.2	0.1	1.9	20.44	This study	Brendel	Unknown	Oligocene	Deep-time	Unknown	Unknown	Nanning, China	Oligocene
FC13-04	-27.3	-25	0.1	0.1	2.3	18.85	This study	Brendel	Unknown	Miocene	Deep-time	Unknown	Unknown	Finish Stream, Russia	11.6-5.3 Ma
FC13-02	-26	-23.4	0.2	0.1	2.6	29.99	This study	Brendel	Unknown	Miocene	Deep-time	Unknown	Unknown	Finish Stream, Russia	11.6-5.3 Ma
FC13-04	-27.5	-25	0.4	0.3	2.5	26.88	This study	Brendel	Unknown	Miocene	Deep-time	Unknown	Unknown	Finish Stream, Russia	11.6-5.3 Ma
FC1302	-29.3	-24.9	0.1	0.2	4.4	18.6	This study	Brendel	Unknown	Miocene	Deep-time	Unknown	Unknown	Finish Stream, Russia	11.6-5.3 Ma
NA	-22.8	-20.35	1.27	1.24	2.45	NA	Jahren and Stenberg 2008	Jayme-Wise	Mestasequoia sp.	Eocene	Deep-time	Deciduous	Gymnosperm	Canada	45 Ma
